# Supplementary material for: A High-Resolution Anatomical Atlas of the Transcriptome in the Mouse Embryo
Source: PubMed Central journal article supplement (PMC3022534; doi:10.1371/journal.pbio.1000582), 2011-01-18
Supplement: pbio.1000582.s008.pdf [file pbio.1000582.s008.pdf]

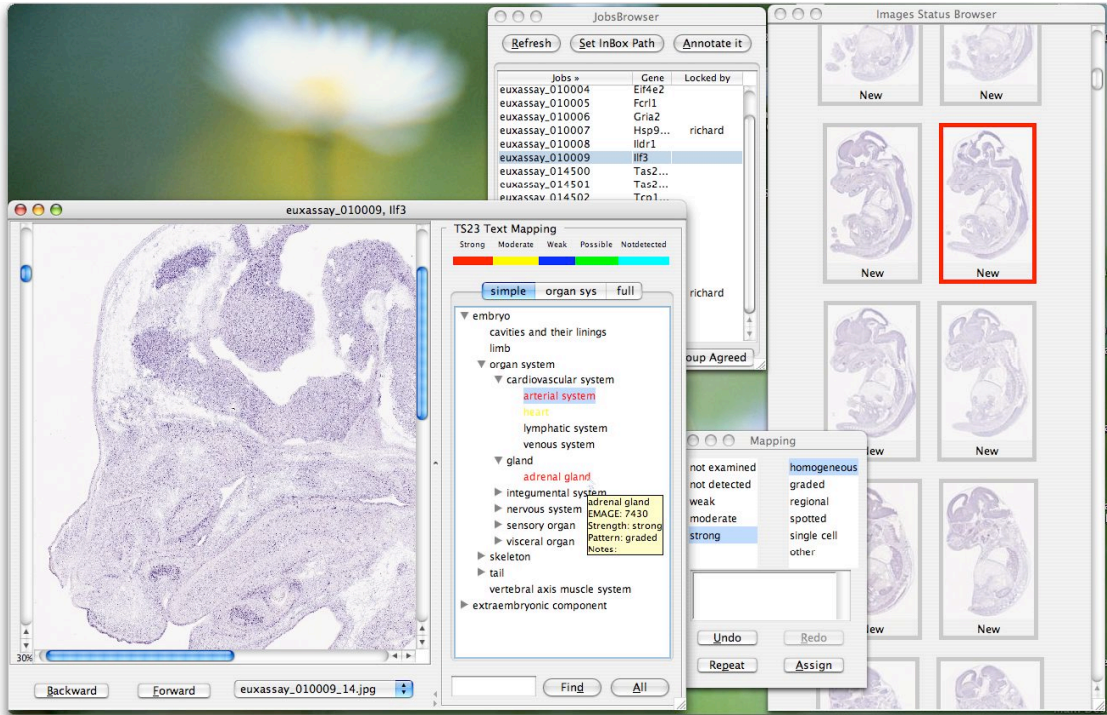

Figure S8
