# Supplementary material for: A High-Resolution Anatomical Atlas of the Transcriptome in the Mouse Embryo
Source: PubMed Central journal article supplement (PMC3022534; doi:10.1371/journal.pbio.1000582), 2011-01-18
Supplement: pbio.1000582.s009.pdf [file pbio.1000582.s009.pdf]

Table S1: Comparison of independently produced ISH-data for the solute carrier superfamily

| Family                                                                         | Gene Symbol<br>(NCBI-link) | set 1<br>(DB-link)     | set 2<br>(DB-link)              | set1<br>Pattern | set2<br>Pattern |  |
|--------------------------------------------------------------------------------|----------------------------|------------------------|---------------------------------|-----------------|-----------------|--|
| high-affinity glutamate and neutral amino acid transporter                     | <a href="#">Slc1a1</a>     | <a href="#">MH2024</a> | <a href="#">euxassay_010393</a> | uwp             | reg             |  |
|                                                                                | <a href="#">Slc1a2</a>     | <a href="#">MH2136</a> | <a href="#">euxassay_009471</a> | reg             | reg             |  |
|                                                                                | <a href="#">Slc1a3</a>     | <a href="#">MH1882</a> | <a href="#">euxassay_001899</a> | reg             | reg             |  |
|                                                                                | <a href="#">Slc1a4</a>     | <a href="#">MH2137</a> | <a href="#">euxassay_000562</a> | reg             | reg             |  |
|                                                                                | <a href="#">Slc1a6</a>     | <a href="#">MH2138</a> | <a href="#">euxassay_009472</a> | reg             | reg             |  |
|                                                                                | <a href="#">Slc1a7</a>     | <a href="#">MH2377</a> | <a href="#">euxassay_003213</a> | ubi             | ubi             |  |
| facilitative GLUT transporter                                                  | <a href="#">Slc2a1</a>     | <a href="#">MH1862</a> | <a href="#">euxassay_000500</a> | reg             | uwp             |  |
|                                                                                | <a href="#">Slc2a2</a>     | <a href="#">MH2211</a> | <a href="#">euxassay_005057</a> | reg             | reg             |  |
|                                                                                | <a href="#">Slc2a3</a>     | <a href="#">MH1883</a> | <a href="#">euxassay_017628</a> | reg             | reg             |  |
|                                                                                | <a href="#">Slc2a4</a>     | <a href="#">MH1858</a> | <a href="#">euxassay_008805</a> | nd              | nd              |  |
|                                                                                | <a href="#">Slc2a5</a>     | <a href="#">MH2092</a> | <a href="#">euxassay_017789</a> | nd              | nd              |  |
|                                                                                | <a href="#">Slc2a6</a>     | <a href="#">MH2145</a> | <a href="#">euxassay_009476</a> | nd              | nd              |  |
|                                                                                | <a href="#">Slc2a9</a>     | <a href="#">MH2344</a> | <a href="#">euxassay_006278</a> | reg             | reg             |  |
|                                                                                | <a href="#">Slc2a10</a>    | <a href="#">MH1917</a> | <a href="#">euxassay_014490</a> | ubi             | reg             |  |
|                                                                                | <a href="#">Slc2a12</a>    | <a href="#">MH3172</a> | <a href="#">euxassay_014526</a> | reg             | reg             |  |
|                                                                                | <a href="#">Slc2a13</a>    | <a href="#">MH2144</a> | <a href="#">euxassay_002584</a> | reg             | reg             |  |
| heavy subunits of heteromeric amino acids transporters                         | <a href="#">Slc3a2</a>     | <a href="#">MH2366</a> | <a href="#">euxassay_007752</a> | reg             | reg             |  |
| bicarbonate transporter                                                        | <a href="#">Slc4a5</a>     | <a href="#">MH3173</a> | <a href="#">euxassay_013237</a> | reg             | reg             |  |
|                                                                                | <a href="#">Slc4a10</a>    | <a href="#">MH2878</a> | <a href="#">euxassay_005787</a> | reg             | reg             |  |
|                                                                                | <a href="#">Slc4a11</a>    | <a href="#">MH1963</a> | <a href="#">euxassay_012145</a> | nd              | nd              |  |
| sodium glucose cotransporter                                                   | <a href="#">Slc5a1</a>     | <a href="#">MH2892</a> | <a href="#">euxassay_006141</a> | reg             | nd              |  |
|                                                                                | <a href="#">Slc5a2</a>     | <a href="#">MH2255</a> | <a href="#">euxassay_008654</a> | reg             | nd              |  |
|                                                                                | <a href="#">Slc5a4a</a>    | <a href="#">MH2153</a> | <a href="#">euxassay_002846</a> | ubi             | nd              |  |
|                                                                                | <a href="#">Slc5a5</a>     | <a href="#">MH2845</a> | <a href="#">euxassay_012146</a> | reg             | reg             |  |
|                                                                                | <a href="#">Slc5a6</a>     | <a href="#">MH1938</a> | <a href="#">euxassay_016837</a> | uwp             | uwp             |  |
|                                                                                | <a href="#">Slc5a7</a>     | <a href="#">MH2213</a> | <a href="#">euxassay_017136</a> | reg             | reg             |  |
|                                                                                | <a href="#">Slc5a8</a>     | <a href="#">MH2806</a> | <a href="#">euxassay_016829</a> | reg             | nd              |  |
|                                                                                | <a href="#">Slc5a11</a>    | <a href="#">MH2829</a> | <a href="#">euxassay_012346</a> | nd              | nd              |  |
|                                                                                | <a href="#">Slc5a12</a>    | <a href="#">MH2830</a> | <a href="#">euxassay_017111</a> | ubi             | nd              |  |
| sodium- and chloride-dependent neurotransmitter transporter                    | <a href="#">Slc6a2</a>     | <a href="#">MH1976</a> | <a href="#">euxassay_004595</a> | reg             | reg             |  |
|                                                                                | <a href="#">Slc6a5</a>     | <a href="#">MH1964</a> | <a href="#">euxassay_012148</a> | reg             | reg             |  |
|                                                                                | <a href="#">Slc6a6</a>     | <a href="#">MH1975</a> | <a href="#">euxassay_004447</a> | reg             | reg             |  |
|                                                                                | <a href="#">Slc6a7</a>     | <a href="#">MH2155</a> | <a href="#">euxassay_012672</a> | reg             | reg             |  |
|                                                                                | <a href="#">Slc6a8</a>     | <a href="#">MH1921</a> | <a href="#">euxassay_008232</a> | ubi             | ubi             |  |
|                                                                                | <a href="#">Slc6a9</a>     | <a href="#">MH2348</a> | <a href="#">euxassay_003521</a> | reg             | reg             |  |
|                                                                                | <a href="#">Slc6a11</a>    | <a href="#">MH1911</a> | <a href="#">euxassay_009039</a> | reg             | reg             |  |
|                                                                                | <a href="#">Slc6a14</a>    | <a href="#">MH1866</a> | <a href="#">euxassay_016455</a> | nd              | nd              |  |
|                                                                                | <a href="#">Slc6a15</a>    | <a href="#">MH2154</a> | <a href="#">euxassay_012147</a> | reg             | reg             |  |
|                                                                                | <a href="#">Slc6a17</a>    | <a href="#">MH2893</a> | <a href="#">euxassay_016993</a> | reg             | reg             |  |
|                                                                                | <a href="#">Slc6a18</a>    | <a href="#">MH2346</a> | <a href="#">euxassay_007790</a> | reg             | reg             |  |
|                                                                                | <a href="#">Slc6a19</a>    | <a href="#">MH2196</a> | <a href="#">euxassay_012968</a> | nd              | nd              |  |
|                                                                                | <a href="#">Slc6a20</a>    | <a href="#">MH2347</a> | <a href="#">euxassay_004446</a> | reg             | reg             |  |
| cationic amino acid transporter/glycoprotein-associated amino acid transporter | <a href="#">Slc7a1</a>     | <a href="#">MH2156</a> | <a href="#">euxassay_012248</a> | reg             | reg             |  |
|                                                                                | <a href="#">Slc7a2</a>     | <a href="#">MH1890</a> | <a href="#">euxassay_012150</a> | reg             | reg             |  |
|                                                                                | <a href="#">Slc7a3</a>     | <a href="#">MH1965</a> | <a href="#">euxassay_006447</a> | reg             | reg             |  |
|                                                                                | <a href="#">Slc7a5</a>     | <a href="#">MH1993</a> | <a href="#">euxassay_003902</a> | uwp             | nd              |  |
|                                                                                | <a href="#">Slc7a6</a>     | <a href="#">MH2159</a> | <a href="#">euxassay_005955</a> | reg             | reg             |  |
|                                                                                | <a href="#">Slc7a9</a>     | <a href="#">MH2350</a> | <a href="#">euxassay_006096</a> | reg             | reg             |  |
|                                                                                | <a href="#">Slc7a10</a>    | <a href="#">MH2157</a> | <a href="#">euxassay_006170</a> | reg             | reg             |  |
|                                                                                | <a href="#">Slc7a11</a>    | <a href="#">MH2074</a> | <a href="#">euxassay_012149</a> | reg             | reg             |  |
|                                                                                | <a href="#">Slc7a12</a>    | <a href="#">MH2370</a> | <a href="#">euxassay_016352</a> | ubi             | nd              |  |
|                                                                                | <a href="#">Slc7a14</a>    | <a href="#">MH2313</a> | <a href="#">euxassay_004372</a> | reg             | reg             |  |
| Na <sup>+</sup> /Ca <sup>2+</sup> exchanger                                    | <a href="#">Slc8a1</a>     | <a href="#">MH1892</a> | <a href="#">euxassay_009439</a> | reg             | reg             |  |
|                                                                                | <a href="#">Slc8a2</a>     | <a href="#">MH2831</a> | <a href="#">euxassay_005720</a> | reg             | reg             |  |

| Family                                             | Gene Symbol<br>(NCBI-link) | set 1<br>(DB-link)              | set 2<br>(DB-link)              | set1<br>Pattern | set2<br>Pattern |  |
|----------------------------------------------------|----------------------------|---------------------------------|---------------------------------|-----------------|-----------------|--|
| Na <sup>+</sup> /Ca <sup>2+</sup> exchanger        | <a href="#">Slc8a3</a>     | <a href="#">MH2034</a>          | <a href="#">euxassay_016353</a> | reg             | reg             |  |
| Na <sup>+</sup> /H <sup>+</sup> exchanger          | <a href="#">Slc9a1</a>     | <a href="#">MH2894</a>          | <a href="#">euxassay_001642</a> | uwp             | uwp             |  |
|                                                    | <a href="#">Slc9a2</a>     | <a href="#">MH2109</a>          | <a href="#">euxassay_012151</a> | nd              | nd              |  |
|                                                    | <a href="#">Slc9a4</a>     | <a href="#">MH2895</a>          | <a href="#">euxassay_012249</a> | nd              | nd              |  |
|                                                    | <a href="#">Slc9a6</a>     | <a href="#">MH1901</a>          | <a href="#">euxassay_012153</a> | reg             | reg             |  |
|                                                    | <a href="#">Slc9a7</a>     | <a href="#">MH1893</a>          | <a href="#">euxassay_012313</a> | nd              | nd              |  |
|                                                    | <a href="#">Slc9a9</a>     | <a href="#">MH3147</a>          | <a href="#">euxassay_014481</a> | reg             | reg             |  |
| sodium bile salt cotransporter                     | <a href="#">Slc10a1</a>    | <a href="#">MH2392</a>          | <a href="#">euxassay_016659</a> | nd              | nd              |  |
|                                                    | <a href="#">Slc10a4</a>    | <a href="#">MH2813</a>          | <a href="#">euxassay_010865</a> | reg             | reg             |  |
|                                                    | <a href="#">Slc10a5</a>    | <a href="#">MH3145</a>          | <a href="#">euxassay_013752</a> | nd              | nd              |  |
|                                                    | <a href="#">Slc10a6</a>    | <a href="#">MH2315</a>          | <a href="#">euxassay_006446</a> | nd              | nd              |  |
|                                                    | <a href="#">Slc10a7</a>    | <a href="#">MH2787</a>          | <a href="#">euxassay_017793</a> | reg             | reg             |  |
| proton coupled metal ion transporter               | <a href="#">Slc11a1</a>    | <a href="#">MH2133</a>          | <a href="#">euxassay_009438</a> | nd              | nd              |  |
|                                                    | <a href="#">Slc11a2</a>    | <a href="#">MH2134</a>          | <a href="#">euxassay_002307</a> | uwp             | uwp             |  |
| electroneutral cation-Cl cotransporter             | <a href="#">Slc12a1</a>    | <a href="#">MH2265</a>          | <a href="#">euxassay_005056</a> | reg             | uwp             |  |
|                                                    | <a href="#">Slc12a2</a>    | <a href="#">MH1948</a>          | <a href="#">euxassay_008837</a> | reg             | reg             |  |
|                                                    | <a href="#">Slc12a3</a>    | <a href="#">MH3148</a>          | <a href="#">euxassay_001990</a> | nd              | nd              |  |
|                                                    | <a href="#">Slc12a5</a>    | <a href="#">MH1950</a>          | <a href="#">euxassay_016890</a> | reg             | reg             |  |
|                                                    | <a href="#">Slc12a6</a>    | <a href="#">MH1951</a>          | <a href="#">euxassay_016520</a> | reg             | reg             |  |
|                                                    | <a href="#">Slc12a7</a>    | <a href="#">MH2022</a>          | <a href="#">euxassay_009467</a> | reg             | reg             |  |
| Na <sup>+</sup> -sulfate/carboxylate cotransporter | <a href="#">Slc13a1</a>    | <a href="#">MH2873</a>          | <a href="#">euxassay_003034</a> | nd              | reg             |  |
|                                                    | <a href="#">Slc13a2</a>    | <a href="#">MH2881</a>          | <a href="#">euxassay_011431</a> | reg             | nd              |  |
|                                                    | <a href="#">Slc13a3</a>    | <a href="#">MH1953</a>          | <a href="#">euxassay_002522</a> | nd              | nd              |  |
| urea transporter                                   | <a href="#">Slc14a1</a>    | <a href="#">MH2207</a>          | <a href="#">euxassay_014569</a> | reg             | reg             |  |
|                                                    | <a href="#">Slc14a2</a>    | <a href="#">MH2270</a>          | <a href="#">euxassay_000491</a> | reg             | reg             |  |
| proton oligopeptide cotransporter                  | <a href="#">Slc15a1</a>    | <a href="#">MH2400</a>          | <a href="#">euxassay_016347</a> | ubi             | nd              |  |
|                                                    | <a href="#">Slc15a2</a>    | <a href="#">MH2882</a>          | <a href="#">euxassay_006140</a> | reg             | reg             |  |
|                                                    | <a href="#">Slc15a3</a>    | <a href="#">MH2023</a>          | <a href="#">euxassay_005166</a> | reg             | reg             |  |
|                                                    | <a href="#">Slc15a4</a>    | <a href="#">MH2218</a>          | <a href="#">euxassay_002984</a> | uwp             | uwp             |  |
| monocarboxylate transporter                        | <a href="#">Slc16a4</a>    | <a href="#">MH2203</a>          | <a href="#">euxassay_001537</a> | reg             | reg             |  |
|                                                    | <a href="#">Slc16a5</a>    | <a href="#">MH2397</a>          | <a href="#">euxassay_016348</a> | nd              | nd              |  |
|                                                    | <a href="#">Slc16a8</a>    | <a href="#">MH1969</a>          | <a href="#">euxassay_004301</a> | ubi             | nd              |  |
|                                                    | <a href="#">Slc16a9</a>    | <a href="#">MH1983</a>          | <a href="#">euxassay_009116</a> | reg             | reg             |  |
|                                                    | <a href="#">Slc16a10</a>   | <a href="#">MH1980</a>          | <a href="#">euxassay_010493</a> | reg             | reg             |  |
|                                                    | <a href="#">Slc16a11</a>   | <a href="#">MH2842</a>          | <a href="#">euxassay_009468</a> | ubi             | nd              |  |
|                                                    | <a href="#">Slc16a12</a>   | <a href="#">MH2001</a>          | <a href="#">euxassay_007957</a> | reg             | reg             |  |
| vesicular glutamate transporter                    | <a href="#">Slc17a1</a>    | <a href="#">MH2788</a>          | <a href="#">euxassay_004444</a> | nd              | nd              |  |
|                                                    | <a href="#">Slc17a2</a>    | <a href="#">MH2084</a>          | <a href="#">euxassay_006703</a> | nd              | nd              |  |
|                                                    | <a href="#">Slc17a3</a>    | <a href="#">MH2340</a>          | <a href="#">euxassay_001538</a> | reg             | reg             |  |
|                                                    | <a href="#">Slc17a5</a>    | <a href="#">MH1984</a>          | <a href="#">euxassay_005553</a> | ubi             | nd              |  |
|                                                    | <a href="#">Slc17a6</a>    | <a href="#">MH2208</a>          | <a href="#">euxassay_004371</a> | reg             | reg             |  |
|                                                    | <a href="#">Slc17a7</a>    | <a href="#">MH2789</a>          | <a href="#">euxassay_001627</a> | uwp             | uwp             |  |
| vesicular amine transporter                        | <a href="#">Slc18a1</a>    | <a href="#">MH2341</a>          | <a href="#">euxassay_005750</a> | reg             | reg             |  |
|                                                    | <a href="#">Slc18a3</a>    | <a href="#">MH1954</a>          | <a href="#">euxassay_009469</a> | reg             | reg             |  |
| folate/thiamine transporter                        | <a href="#">Slc19a1</a>    | <a href="#">MY266</a>           | <a href="#">euxassay_008691</a> | uwp             | uwp             |  |
|                                                    | <a href="#">Slc19a3</a>    | <a href="#">MH1956</a>          | <a href="#">euxassay_009470</a> | nd              | nd              |  |
| type-III Na <sup>+</sup> -phosphate cotransporter  | <a href="#">Slc20a1</a>    | <a href="#">MH2883</a>          | <a href="#">euxassay_009182</a> | reg             | reg             |  |
| organic anion transporter                          | <a href="#">Slco1a1</a>    | <a href="#">MH2263</a>          | <a href="#">euxassay_001539</a> | uwp             | uwp             |  |
|                                                    | <a href="#">Slco1a4</a>    | <a href="#">MH2052</a>          | <a href="#">euxassay_012154</a> | reg             | reg             |  |
|                                                    | <a href="#">Slco1a6</a>    | <a href="#">MH2351</a>          | <a href="#">euxassay_001548</a> | reg             | reg             |  |
|                                                    | <a href="#">Slco1c1</a>    | <a href="#">MH1994</a>          | <a href="#">euxassay_007061</a> | reg             | reg             |  |
|                                                    | <a href="#">Slco2a1</a>    | <a href="#">MH2896</a>          | <a href="#">euxassay_014301</a> | reg             | reg             |  |
|                                                    | <a href="#">Slco2b1</a>    | <a href="#">MH2205</a>          | <a href="#">euxassay_012250</a> | reg             | reg             |  |
|                                                    | <a href="#">Slco3a1</a>    | <a href="#">MH2053</a>          | <a href="#">euxassay_000780</a> | reg             | reg             |  |
| <a href="#">Slco5a1</a>                            | <a href="#">MH1995</a>     | <a href="#">euxassay_012155</a> | reg                             | reg             |                 |  |

| Family                                      | Gene Symbol<br>(NCBI-link) | set 1<br>(DB-link)              | set 2<br>(DB-link)              | set1<br>Pattern | set2<br>Pattern |  |
|---------------------------------------------|----------------------------|---------------------------------|---------------------------------|-----------------|-----------------|--|
| organic anion transporter                   | <a href="#">Slc06c1</a>    | <a href="#">MH2381</a>          | <a href="#">euxassay_014527</a> | nd              | nd              |  |
| organic cation/anion/zwitterion transporter | <a href="#">Slc22a1</a>    | <a href="#">MH2085</a>          | <a href="#">euxassay_000534</a> | ubi             | ubi             |  |
|                                             | <a href="#">Slc22a3</a>    | <a href="#">MH2044</a>          | <a href="#">euxassay_014478</a> | reg             | reg             |  |
|                                             | <a href="#">Slc22a4</a>    | <a href="#">MH2077</a>          | <a href="#">euxassay_006930</a> | reg             | reg             |  |
|                                             | <a href="#">Slc22a5</a>    | <a href="#">MH1970</a>          | <a href="#">euxassay_007211</a> | uwp             | nd              |  |
|                                             | <a href="#">Slc22a6</a>    | <a href="#">MH1959</a>          | <a href="#">euxassay_012001</a> | reg             | reg             |  |
|                                             | <a href="#">Slc22a9</a>    | <a href="#">MH2393</a>          | <a href="#">euxassay_008882</a> | nd              | nd              |  |
|                                             | <a href="#">Slc22a12</a>   | <a href="#">MH2106</a>          | <a href="#">euxassay_003608</a> | reg             | reg             |  |
|                                             | <a href="#">Slc22a13</a>   | <a href="#">MH3097</a>          | <a href="#">euxassay_007886</a> | reg             | reg             |  |
|                                             | <a href="#">Slc22a15</a>   | <a href="#">MH2079</a>          | <a href="#">euxassay_000391</a> | uwp             | uwp             |  |
|                                             | <a href="#">Slc22a16</a>   | <a href="#">MH1958</a>          | <a href="#">euxassay_016349</a> | nd              | nd              |  |
|                                             | <a href="#">Slc22a18</a>   | <a href="#">MH2884</a>          | <a href="#">euxassay_006554</a> | reg             | nd              |  |
|                                             | <a href="#">Slc22a20</a>   | <a href="#">MH2822</a>          | <a href="#">euxassay_005954</a> | nd              | nd              |  |
| Na+-dependent ascorbic acid transporter     | <a href="#">Slc23a1</a>    | <a href="#">MH3198</a>          | <a href="#">euxassay_008672</a> | reg             | reg             |  |
|                                             | <a href="#">Slc23a2</a>    | <a href="#">MH2004</a>          | <a href="#">euxassay_019254</a> | reg             | reg             |  |
|                                             | <a href="#">Slc23a3</a>    | <a href="#">MH2086</a>          | <a href="#">euxassay_002900</a> | nd              | nd              |  |
| Na+/(Ca2+-K+) exchanger                     | <a href="#">Slc24a1</a>    | <a href="#">MH2231</a>          | <a href="#">euxassay_017761</a> | nd              | nd              |  |
|                                             | <a href="#">Slc24a2</a>    | <a href="#">MH2139</a>          | <a href="#">euxassay_014525</a> | nd              | nd              |  |
|                                             | <a href="#">Slc24a3</a>    | <a href="#">MH2005</a>          | <a href="#">euxassay_005602</a> | reg             | reg             |  |
|                                             | <a href="#">Slc24a5</a>    | <a href="#">MH1987</a>          | <a href="#">euxassay_006990</a> | reg             | reg             |  |
| mitochondrial carrier                       | <a href="#">Slc25a1</a>    | <a href="#">MH1988</a>          | <a href="#">euxassay_007829</a> | reg             | reg             |  |
|                                             | <a href="#">Slc25a2</a>    | <a href="#">MH2859</a>          | <a href="#">euxassay_014479</a> | nd              | nd              |  |
|                                             | <a href="#">Slc25a4</a>    | <a href="#">MH2210</a>          | <a href="#">euxassay_010636</a> | uwp             | uwp             |  |
|                                             | <a href="#">Slc25a5</a>    | <a href="#">MH2047</a>          | <a href="#">euxassay_004504</a> | uwp             | uwp             |  |
|                                             | <a href="#">Ucp1</a>       | <a href="#">MH2096</a>          | <a href="#">euxassay_017846</a> | nd              | nd              |  |
|                                             | <a href="#">Ucp3</a>       | <a href="#">MH2333</a>          | <a href="#">euxassay_011894</a> | nd              | nd              |  |
|                                             | <a href="#">Slc25a10</a>   | <a href="#">MH2858</a>          | <a href="#">euxassay_008673</a> | uwp             | uwp             |  |
|                                             | <a href="#">Slc25a11</a>   | <a href="#">MH2025</a>          | <a href="#">euxassay_006233</a> | uwp             | uwp             |  |
|                                             | <a href="#">Slc25a12</a>   | <a href="#">MH2087</a>          | <a href="#">euxassay_003824</a> | ubi             | ubi             |  |
|                                             | <a href="#">Slc25a13</a>   | <a href="#">MH2088</a>          | <a href="#">euxassay_006704</a> | reg             | reg             |  |
|                                             | <a href="#">Slc25a14</a>   | <a href="#">MH2089</a>          | <a href="#">euxassay_004145</a> | nd              | nd              |  |
|                                             | <a href="#">Slc25a15</a>   | <a href="#">MH2026</a>          | <a href="#">euxassay_012785</a> | reg             | reg             |  |
|                                             | <a href="#">Slc25a16</a>   | <a href="#">MH2027</a>          | <a href="#">euxassay_010736</a> | nd              | nd              |  |
|                                             | <a href="#">Slc25a17</a>   | <a href="#">MH2045</a>          | <a href="#">euxassay_004503</a> | uwp             | uwp             |  |
|                                             | <a href="#">Slc25a19</a>   | <a href="#">MH2039</a>          | <a href="#">euxassay_010653</a> | ubi             | ubi             |  |
|                                             | <a href="#">Slc25a20</a>   | <a href="#">MH2046</a>          | <a href="#">euxassay_007750</a> | uwp             | nd              |  |
|                                             | <a href="#">Slc25a23</a>   | <a href="#">MH2078</a>          | <a href="#">euxassay_007865</a> | uwp             | uwp             |  |
|                                             | <a href="#">Slc25a25</a>   | <a href="#">MH2028</a>          | <a href="#">euxassay_005554</a> | ubi             | nd              |  |
|                                             | <a href="#">Slc25a26</a>   | <a href="#">MH2141</a>          | <a href="#">euxassay_002888</a> | ubi             | nd              |  |
|                                             | <a href="#">Slc25a27</a>   | <a href="#">MH2219</a>          | <a href="#">euxassay_014487</a> | reg             | reg             |  |
|                                             | <a href="#">Slc25a28</a>   | <a href="#">MH2091</a>          | <a href="#">euxassay_001566</a> | nd              | nd              |  |
|                                             | <a href="#">Slc25a29</a>   | <a href="#">MH2029</a>          | <a href="#">euxassay_004416</a> | ubi             | nd              |  |
|                                             | <a href="#">Slc25a30</a>   | <a href="#">MH2063</a>          | <a href="#">euxassay_014289</a> | reg             | nd              |  |
|                                             | <a href="#">Slc25a32</a>   | <a href="#">MH2791</a>          | <a href="#">euxassay_005621</a> | reg             | nd              |  |
|                                             | <a href="#">Slc25a33</a>   | <a href="#">MH2815</a>          | <a href="#">euxassay_016418</a> | nd              | nd              |  |
|                                             | <a href="#">Slc25a35</a>   | <a href="#">MH2317</a>          | <a href="#">euxassay_013622</a> | reg             | reg             |  |
|                                             | <a href="#">Slc25a36</a>   | <a href="#">MH2318</a>          | <a href="#">euxassay_003666</a> | reg             | uwp             |  |
|                                             | <a href="#">Slc25a37</a>   | <a href="#">MH2319</a>          | <a href="#">euxassay_007768</a> | reg             | reg             |  |
|                                             | <a href="#">Slc25a38</a>   | <a href="#">MH2310</a>          | <a href="#">euxassay_000811</a> | reg             | reg             |  |
|                                             | <a href="#">Slc25a39</a>   | <a href="#">MH2306</a>          | <a href="#">euxassay_000139</a> | reg             | uwp             |  |
|                                             | <a href="#">Slc25a40</a>   | <a href="#">MH2308</a>          | <a href="#">euxassay_007962</a> | nd              | nd              |  |
|                                             | <a href="#">Slc25a43</a>   | <a href="#">MH2794</a>          | <a href="#">euxassay_013708</a> | nd              | nd              |  |
| <a href="#">Slc25a44</a>                    | <a href="#">MH2309</a>     | <a href="#">euxassay_003808</a> | nd                              | nd              |                 |  |
| multifunctional anion exchanger             | <a href="#">Slc26a3</a>    | <a href="#">MH2342</a>          | <a href="#">euxassay_010893</a> | nd              | nd              |  |
|                                             | <a href="#">Slc26a4</a>    | <a href="#">MH2844</a>          | <a href="#">euxassay_014488</a> | reg             | reg             |  |

| Family                                                        | Gene Symbol<br>(NCBI-link) | set 1<br>(DB-link)              | set 2<br>(DB-link)              | set1<br>Pattern | set2<br>Pattern |  |
|---------------------------------------------------------------|----------------------------|---------------------------------|---------------------------------|-----------------|-----------------|--|
| multifunctional anion exchanger                               | <a href="#">Slc26a5</a>    | <a href="#">MH2132</a>          | <a href="#">euxassay_016350</a> | uwp             | nd              |  |
|                                                               | <a href="#">Slc26a6</a>    | <a href="#">MH2343</a>          | <a href="#">euxassay_002740</a> | ubi             | nd              |  |
|                                                               | <a href="#">Slc26a8</a>    | <a href="#">MH2378</a>          | <a href="#">euxassay_002632</a> | ubi             | ubi             |  |
|                                                               | <a href="#">Slc26a9</a>    | <a href="#">MH2401</a>          | <a href="#">euxassay_014489</a> | nd              | reg             |  |
|                                                               | <a href="#">Slc26a11</a>   | <a href="#">MH1989</a>          | <a href="#">euxassay_012246</a> | nd              | nd              |  |
| fatty acid transporter                                        | <a href="#">Slc27a1</a>    | <a href="#">MH2204</a>          | <a href="#">euxassay_010364</a> | reg             | reg             |  |
|                                                               | <a href="#">Slc27a2</a>    | <a href="#">MH1914</a>          | <a href="#">euxassay_011400</a> | reg             | reg             |  |
|                                                               | <a href="#">Slc27a3</a>    | <a href="#">MH1915</a>          | <a href="#">euxassay_009473</a> | reg             | reg             |  |
|                                                               | <a href="#">Slc27a6</a>    | <a href="#">MH1960</a>          | <a href="#">euxassay_009474</a> | reg             | reg             |  |
| Na <sup>+</sup> -coupled nucleoside transporter               | <a href="#">Slc28a1</a>    | <a href="#">MH2379</a>          | <a href="#">euxassay_006962</a> | nd              | reg             |  |
|                                                               | <a href="#">Slc28a2</a>    | <a href="#">MH2191</a>          | <a href="#">euxassay_001709</a> | reg             | reg             |  |
|                                                               | <a href="#">Slc28a3</a>    | <a href="#">MH2886</a>          | <a href="#">euxassay_006705</a> | ubi             | reg             |  |
| facilitative nucleoside transporter                           | <a href="#">Slc29a1</a>    | <a href="#">MH1916</a>          | <a href="#">euxassay_002695</a> | reg             | reg             |  |
|                                                               | <a href="#">Slc29a2</a>    | <a href="#">MH2032</a>          | <a href="#">euxassay_010127</a> | ubi             | nd              |  |
|                                                               | <a href="#">Slc29a3</a>    | <a href="#">MH1990</a>          | <a href="#">euxassay_009475</a> | uwp             | nd              |  |
|                                                               | <a href="#">Slc29a4</a>    | <a href="#">MH2107</a>          | <a href="#">euxassay_005625</a> | uwp             | uwp             |  |
| zinc efflux transporter                                       | <a href="#">Slc30a1</a>    | <a href="#">MH2887</a>          | <a href="#">euxassay_004146</a> | reg             | reg             |  |
|                                                               | <a href="#">Slc30a2</a>    | <a href="#">MH1961</a>          | <a href="#">euxassay_016470</a> | reg             | uwp             |  |
|                                                               | <a href="#">Slc30a3</a>    | <a href="#">MH2373</a>          | <a href="#">euxassay_009477</a> | reg             | reg             |  |
|                                                               | <a href="#">Slc30a4</a>    | <a href="#">MH1991</a>          | <a href="#">euxassay_013986</a> | reg             | nd              |  |
|                                                               | <a href="#">Slc30a5</a>    | <a href="#">MH1962</a>          | <a href="#">euxassay_010448</a> | uwp             | uwp             |  |
|                                                               | <a href="#">Slc30a6</a>    | <a href="#">MH1885</a>          | <a href="#">euxassay_005975</a> | nd              | uwp             |  |
|                                                               | <a href="#">Slc30a9</a>    | <a href="#">MH2069</a>          | <a href="#">euxassay_010926</a> | uwp             | uwp             |  |
| vesicular inhibitory amino acid transporter                   | <a href="#">Slc32a1</a>    | <a href="#">MH2889</a>          | <a href="#">euxassay_010420</a> | reg             | reg             |  |
| acetylc-CoA transporter                                       | <a href="#">Slc33a1</a>    | <a href="#">MH2363</a>          | <a href="#">euxassay_004169</a> | uwp             | nd              |  |
| type-II Na <sup>+</sup> -phosphate cotransporter              | <a href="#">Slc34a1</a>    | <a href="#">MH2064</a>          | <a href="#">euxassay_011507</a> | reg             | reg             |  |
|                                                               | <a href="#">Slc34a2</a>    | <a href="#">MH2395</a>          | <a href="#">euxassay_017064</a> | ubi             | nd              |  |
|                                                               | <a href="#">Slc34a3</a>    | <a href="#">MH2797</a>          | <a href="#">euxassay_016351</a> | nd              | nd              |  |
| nucleoside-sugar transporter                                  | <a href="#">Slc35a1</a>    | <a href="#">MH1971</a>          | <a href="#">euxassay_006887</a> | reg             | reg             |  |
|                                                               | <a href="#">Slc35a3</a>    | <a href="#">MH1972</a>          | <a href="#">euxassay_003279</a> | uwp             | reg             |  |
|                                                               | <a href="#">Slc35a4</a>    | <a href="#">MH2146</a>          | <a href="#">euxassay_004834</a> | uwp             | uwp             |  |
|                                                               | <a href="#">Slc35a5</a>    | <a href="#">MH2071</a>          | <a href="#">euxassay_002309</a> | nd              | nd              |  |
|                                                               | <a href="#">Slc35b1</a>    | <a href="#">MH1929</a>          | <a href="#">euxassay_005005</a> | uwp             | uwp             |  |
|                                                               | <a href="#">Slc35b2</a>    | <a href="#">MH2072</a>          | <a href="#">euxassay_010411</a> | uwp             | uwp             |  |
|                                                               | <a href="#">Slc35b3</a>    | <a href="#">MH2192</a>          | <a href="#">euxassay_003609</a> | uwp             | uwp             |  |
|                                                               | <a href="#">Slc35c2</a>    | <a href="#">MH1930</a>          | <a href="#">euxassay_003890</a> | uwp             | nd              |  |
|                                                               | <a href="#">Slc35d1</a>    | <a href="#">MH2073</a>          | <a href="#">euxassay_016992</a> | reg             | reg             |  |
|                                                               | <a href="#">Slc35d3</a>    | <a href="#">MH2042</a>          | <a href="#">euxassay_009478</a> | reg             | reg             |  |
|                                                               | <a href="#">Slc35e1</a>    | <a href="#">MH2798</a>          | <a href="#">euxassay_015962</a> | uwp             | uwp             |  |
|                                                               | <a href="#">Slc35e3</a>    | <a href="#">MH2043</a>          | <a href="#">euxassay_004678</a> | reg             | reg             |  |
|                                                               | <a href="#">Slc35f1</a>    | <a href="#">MH2048</a>          | <a href="#">euxassay_008274</a> | reg             | reg             |  |
|                                                               | <a href="#">Slc35f2</a>    | <a href="#">MH3177</a>          | <a href="#">euxassay_003909</a> | reg             | reg             |  |
|                                                               | <a href="#">Slc35f3</a>    | <a href="#">MH2396</a>          | <a href="#">euxassay_012247</a> | ubi             | nd              |  |
|                                                               | <a href="#">Slc35f4</a>    | <a href="#">MH2799</a>          | <a href="#">euxassay_015857</a> | nd              | nd              |  |
| <a href="#">Slc35f5</a>                                       | <a href="#">MH2049</a>     | <a href="#">euxassay_000120</a> | uwp                             | uwp             |                 |  |
| proton-coupled amino acid transporter                         | <a href="#">Slc36a1</a>    | <a href="#">MH1931</a>          | <a href="#">euxassay_012143</a> | reg             | reg             |  |
|                                                               | <a href="#">Slc36a2</a>    | <a href="#">MH2380</a>          | <a href="#">euxassay_003901</a> | reg             | reg             |  |
|                                                               | <a href="#">Slc36a4</a>    | <a href="#">MH2823</a>          | <a href="#">euxassay_004078</a> | nd              | nd              |  |
| sugar-phosphate/phosphate exchanger                           | <a href="#">Slc37a1</a>    | <a href="#">MH2150</a>          | <a href="#">euxassay_003753</a> | ubi             | nd              |  |
|                                                               | <a href="#">Slc37a2</a>    | <a href="#">MH1886</a>          | <a href="#">euxassay_016891</a> | nd              | nd              |  |
|                                                               | <a href="#">Slc37a3</a>    | <a href="#">MH1932</a>          | <a href="#">euxassay_017080</a> | uwp             | nd              |  |
|                                                               | <a href="#">Slc37a4</a>    | <a href="#">MH2875</a>          | <a href="#">euxassay_005966</a> | reg             | uwp             |  |
| System A and N, sodium-coupled neutral amino acid transporter | <a href="#">Slc38a2</a>    | <a href="#">MH1895</a>          | <a href="#">euxassay_008760</a> | reg             | reg             |  |
|                                                               | <a href="#">Slc38a3</a>    | <a href="#">MH2193</a>          | <a href="#">euxassay_004113</a> | reg             | reg             |  |
|                                                               | <a href="#">Slc38a4</a>    | <a href="#">MH2364</a>          | <a href="#">euxassay_004567</a> | nd              | reg             |  |

| Family                                                        | Gene Symbol<br>(NCBI-link) | set 1<br>(DB-link)     | set 2<br>(DB-link)              | set1<br>Pattern | set2<br>Pattern |        |
|---------------------------------------------------------------|----------------------------|------------------------|---------------------------------|-----------------|-----------------|--------|
| System A and N, sodium-coupled neutral amino acid transporter | <a href="#">Slc38a5</a>    | <a href="#">MH2051</a> | <a href="#">euxassay_002353</a> | reg             | reg             | green  |
|                                                               | <a href="#">Slc38a6</a>    | <a href="#">MH2800</a> | <a href="#">euxassay_016081</a> | reg             | nd              | red    |
|                                                               | <a href="#">Slc38a9</a>    | <a href="#">MH3154</a> | <a href="#">euxassay_005652</a> | nd              | nd              | green  |
|                                                               | <a href="#">Slc38a10</a>   | <a href="#">MH3099</a> | <a href="#">euxassay_004151</a> | uwp             | uwp             | green  |
|                                                               | <a href="#">Slc38a11</a>   | <a href="#">MH3154</a> | <a href="#">euxassay_013418</a> | nd              | nd              | green  |
| metal ion transporter                                         | <a href="#">Slc39a1</a>    | <a href="#">MH3187</a> | <a href="#">euxassay_004867</a> | uwp             | uwp             | green  |
|                                                               | <a href="#">Slc39a4</a>    | <a href="#">MH2008</a> | <a href="#">euxassay_003030</a> | uwp             | reg             | green  |
|                                                               | <a href="#">Slc39a5</a>    | <a href="#">MH1934</a> | <a href="#">euxassay_009125</a> | reg             | ubi             | red    |
|                                                               | <a href="#">Slc39a6</a>    | <a href="#">MH1935</a> | <a href="#">euxassay_001445</a> | uwp             | uwp             | green  |
|                                                               | <a href="#">Slc39a7</a>    | <a href="#">MH1918</a> | <a href="#">euxassay_002762</a> | uwp             | uwp             | green  |
|                                                               | <a href="#">Slc39a8</a>    | <a href="#">MH2409</a> | <a href="#">euxassay_011277</a> | reg             | reg             | green  |
|                                                               | <a href="#">Slc39a9</a>    | <a href="#">MH1919</a> | <a href="#">euxassay_014261</a> | uwp             | nd              | yellow |
|                                                               | <a href="#">Slc39a10</a>   | <a href="#">MH2006</a> | <a href="#">euxassay_008838</a> | reg             | reg             | green  |
| basolateral ion transporter                                   | <a href="#">Slc40a1</a>    | <a href="#">MH1936</a> | <a href="#">euxassay_003910</a> | reg             | reg             | green  |
| MgtE-like magnesium transporter                               | <a href="#">Slc41a1</a>    | <a href="#">MH2877</a> | <a href="#">euxassay_012144</a> | reg             | reg             | green  |
|                                                               | <a href="#">Slc41a2</a>    | <a href="#">MH1887</a> | <a href="#">euxassay_009324</a> | nd              | nd              | green  |
|                                                               | <a href="#">Slc41a3</a>    | <a href="#">MH3183</a> | <a href="#">euxassay_006674</a> | reg             | reg             | green  |
| Rh ammonium transporter (pending)                             | <a href="#">Rhag</a>       | <a href="#">MH2082</a> | <a href="#">euxassay_009664</a> | reg             | reg             | green  |
|                                                               | <a href="#">Rhcg</a>       | <a href="#">MH2821</a> | <a href="#">euxassay_007842</a> | reg             | reg             | green  |
| Na+-independent, syste-L-like amino acid transporter          | <a href="#">Slc43a3</a>    | <a href="#">MH2403</a> | <a href="#">euxassay_005875</a> | reg             | reg             | green  |
| Choline-like transporter family                               | <a href="#">Slc44a1</a>    | <a href="#">MH2817</a> | <a href="#">euxassay_012718</a> | reg             | nd              | red    |
|                                                               | <a href="#">Slc44a2</a>    | <a href="#">MH2824</a> | <a href="#">euxassay_003668</a> | reg             | reg             | green  |
|                                                               | <a href="#">Slc44a3</a>    | <a href="#">MH2818</a> | <a href="#">euxassay_002530</a> | reg             | reg             | green  |
|                                                               | <a href="#">Slc44a4</a>    | <a href="#">MH2801</a> | <a href="#">euxassay_007818</a> | reg             | reg             | green  |
| Putative sugar transporter family                             | <a href="#">Slc45a1</a>    | <a href="#">MH2803</a> | <a href="#">euxassay_000403</a> | nd              | nd              | green  |
|                                                               | <a href="#">Slc45a2</a>    | <a href="#">MH2825</a> | <a href="#">euxassay_013778</a> | nd              | nd              | green  |
| Heme transporter family                                       | <a href="#">Slc46a1</a>    | <a href="#">MH2808</a> | <a href="#">euxassay_001608</a> | nd              | nd              | green  |
|                                                               | <a href="#">Slc46a2</a>    | <a href="#">MH2826</a> | <a href="#">euxassay_012435</a> | reg             | reg             | green  |
|                                                               | <a href="#">Slc46a3</a>    | <a href="#">MH2809</a> | <a href="#">euxassay_000957</a> | nd              | nd              | green  |
| Multidrug and toxin extrusion                                 | <a href="#">Slc47a2</a>    | <a href="#">MH2810</a> | <a href="#">euxassay_013290</a> | nd              | nd              | green  |

set 1: data from [www.genepaint.org](http://www.genepaint.org) (Geffers and Eichele, unpublished data)

set 2: data from [www.eurexpress.org](http://www.eurexpress.org)

abbreviations: reg = regional; nd = not detected; uwp = ubiquitous with pattern; ubi = ubiquitous

color code: consistent (green); nd and weak ubi or weak uwp (yellow); inconsistent (red)

The majority of cases are consistent between sets 1 and 2 (green, n = 195, 78%). ISH often cannot distinguish between nd and weak ubi or weak uwp, and 25 (10%) cases fell into this class and are marked in yellow. 28 (12%) cases were inconsistent between sets 1 and 2 and are marked in red. Thus of the 122 reg expression patterns of set 2, 113 are also reg in set 1, while 9 are either uwp, ubi or nd. Hence in the most informative category of regional expression, the two sets agree more than 90%. A similar agreement is seen with the uwp of sets 1 and 2. As can be expected the agreement for nd is somewhat lower with an agreement of 52 out of 86 patterns.
