# Supplementary material for: A High-Resolution Anatomical Atlas of the Transcriptome in the Mouse Embryo
Source: PubMed Central journal article supplement (PMC3022534; doi:10.1371/journal.pbio.1000582), 2011-01-18
Supplement: pbio.1000582.s010.pdf [file pbio.1000582.s010.pdf]

**Table S2: Comparison of EURExpress data against published expression data**

| Template ID | RefSeq accession | Gene symbol          | Concordance         | Reference                                                                                                                                                                                                                                                                                                                                                                                                                          |
|-------------|------------------|----------------------|---------------------|------------------------------------------------------------------------------------------------------------------------------------------------------------------------------------------------------------------------------------------------------------------------------------------------------------------------------------------------------------------------------------------------------------------------------------|
| T1569       | NM_023906        | Asb3                 | NP                  |                                                                                                                                                                                                                                                                                                                                                                                                                                    |
| T4116       | NM_133733        | 9030425E11Rik        | NP                  |                                                                                                                                                                                                                                                                                                                                                                                                                                    |
| T5339       | NM_133190        | Cacng8               | NP                  |                                                                                                                                                                                                                                                                                                                                                                                                                                    |
| T7613       | NM_133750        | 3110048E14Rik        | NP                  |                                                                                                                                                                                                                                                                                                                                                                                                                                    |
| T8641       | NM_013581        | Coq1                 | NP                  |                                                                                                                                                                                                                                                                                                                                                                                                                                    |
| T8887       | NM_008151        | Gpr12                | CONCORDANCE         | Ignatov A, Lintzel J, Hermans-Borgmeyer I, Kreienkamp HJ, Joost P, Thomsen S, Methner A, Schaller HC. Role of the G-protein-coupled receptor GPR12 as high-affinity receptor for sphingosylphosphorylcholine and its expression and function in brain development. <i>J Neurosci</i> 2003 Feb 1,23(3):907-14                                                                                                                       |
| T7122       | NM_016736        | 6330412F12Rik (Nub1) | NP                  |                                                                                                                                                                                                                                                                                                                                                                                                                                    |
| T35200      | NM_177383        | Gpr21                | NP                  |                                                                                                                                                                                                                                                                                                                                                                                                                                    |
| T2778       | NM_010903        | Nfe2l3               | NP                  |                                                                                                                                                                                                                                                                                                                                                                                                                                    |
| T35433      | NM_175647        | Dmrta1               | NP                  |                                                                                                                                                                                                                                                                                                                                                                                                                                    |
| T35847      | XR_005251        | A930024E05Rik        | NP                  |                                                                                                                                                                                                                                                                                                                                                                                                                                    |
| T36070      | XM_355752        | Dgki                 | NP                  |                                                                                                                                                                                                                                                                                                                                                                                                                                    |
| T9316       | NM_027135        | Sec24d               | NP                  |                                                                                                                                                                                                                                                                                                                                                                                                                                    |
| T31018      | NM_021499        | Wdr8                 | NP                  |                                                                                                                                                                                                                                                                                                                                                                                                                                    |
| T31985      | NM_027260        | Vrk2                 | NP                  |                                                                                                                                                                                                                                                                                                                                                                                                                                    |
| T30457      | NM_008992        | Abcd4                | NP                  |                                                                                                                                                                                                                                                                                                                                                                                                                                    |
| T37784      | NM_080795        | Lnx2                 | CONCORDANCE         | Rice DS, Northcutt GM, Kurschner C. "The Lnx family proteins function as molecular scaffolds for Numb family proteins." <i>Mol Cell Neurosci</i> 2001 Nov,18(5):525-40                                                                                                                                                                                                                                                             |
| T40492      | AK018398         | 8430408J09Rik        | NP                  |                                                                                                                                                                                                                                                                                                                                                                                                                                    |
| T45541      | NM_001014390     | Dyrk2                | NP                  |                                                                                                                                                                                                                                                                                                                                                                                                                                    |
| T70151      | MIMAT0003491     | mmu-miR-701          | NP                  |                                                                                                                                                                                                                                                                                                                                                                                                                                    |
| T36964      | NM_172516        | Ripk5                | NP                  |                                                                                                                                                                                                                                                                                                                                                                                                                                    |
| T3840       | NM_018884        | Pdzrn3               | NP                  |                                                                                                                                                                                                                                                                                                                                                                                                                                    |
| T2359       | NM_023850        | Chst1                | NO CONCORDANCE      | van der Zwaag B, Burbach JP, Scharfe C, Oefner PJ, Brunner HG, Padberg GW, van Bokhoven H. "Identifying new candidate genes for hereditary facial paresis on chromosome 3q21-q22 by RNA in situ hybridization in mouse." <i>Genomics</i> 2005 Jul,86(1):55-67                                                                                                                                                                      |
| T4098       | NM_172310        | Tarsl2               | NP                  |                                                                                                                                                                                                                                                                                                                                                                                                                                    |
| T7610       | NM_178891        | Hrmt1l6              | NP                  |                                                                                                                                                                                                                                                                                                                                                                                                                                    |
| T35194      | NM_181543        | Gpr151               | CONCORDANCE         | Ignatov A, Hermans-Borgmeyer I, Schaller HC. "Cloning and characterization of a novel G-protein-coupled receptor with homology to galanin receptors." <i>Neuropharmacology</i> 2004 Jun,46(8):1114-20                                                                                                                                                                                                                              |
| T36957      | NM_021892        | Rfrp                 | NP                  |                                                                                                                                                                                                                                                                                                                                                                                                                                    |
| T38159      | NM_177892        | A230097C02           | NP                  |                                                                                                                                                                                                                                                                                                                                                                                                                                    |
| T30773      | NM_009383        | Tial1                | NP                  |                                                                                                                                                                                                                                                                                                                                                                                                                                    |
| T8662       | NM_178625        | 2700094F01Rik        | NP                  |                                                                                                                                                                                                                                                                                                                                                                                                                                    |
| T35706      | NM_027760        | Rassf8               | NP                  |                                                                                                                                                                                                                                                                                                                                                                                                                                    |
| T36162      | NM_153105        | Cldn19               | NP                  |                                                                                                                                                                                                                                                                                                                                                                                                                                    |
| T37488      | NM_175651        | 9630008K15Rik        | NP                  |                                                                                                                                                                                                                                                                                                                                                                                                                                    |
| T36121      | NM_175631        | Cbln4                | NP                  |                                                                                                                                                                                                                                                                                                                                                                                                                                    |
| T31417      | NM_029945        | Smpd4                | NP                  |                                                                                                                                                                                                                                                                                                                                                                                                                                    |
| T2314       | NM_025897        | 1500003O22Rik        | NP                  |                                                                                                                                                                                                                                                                                                                                                                                                                                    |
| T38213      | NM_028065        | Tnrc5                | NP                  |                                                                                                                                                                                                                                                                                                                                                                                                                                    |
| T40280      | AK077915         | Mipol1               | NP                  |                                                                                                                                                                                                                                                                                                                                                                                                                                    |
| T45629      | XM_973549        | 4930589M24Rik        | NP                  |                                                                                                                                                                                                                                                                                                                                                                                                                                    |
| T45132      | XM_890447        | Mllt4                | NP                  |                                                                                                                                                                                                                                                                                                                                                                                                                                    |
| T6536       | NM_028184        | Oraov1               | NP                  |                                                                                                                                                                                                                                                                                                                                                                                                                                    |
| T35739      | NM_027519        | 6330406I15Rik        | NP                  |                                                                                                                                                                                                                                                                                                                                                                                                                                    |
| T36476      | NM_015820        | Hs6st3               | NP                  |                                                                                                                                                                                                                                                                                                                                                                                                                                    |
| T37027      | NM_009200        | Slc1a6               | NP                  |                                                                                                                                                                                                                                                                                                                                                                                                                                    |
| T31051      | NM_029933        | Bcl9                 | NP                  |                                                                                                                                                                                                                                                                                                                                                                                                                                    |
| T63352      | NM_207237        | Man1c1               | NP                  |                                                                                                                                                                                                                                                                                                                                                                                                                                    |
| T63289      | NM_198678        | Sh3md2               | NP                  |                                                                                                                                                                                                                                                                                                                                                                                                                                    |
| T35109      | NM_009766        | Brs3                 | NP                  |                                                                                                                                                                                                                                                                                                                                                                                                                                    |
| T9940       | NM_026925        | Nplip                | NP                  |                                                                                                                                                                                                                                                                                                                                                                                                                                    |
| T2618       | NM_022408        | Es2el                | CONCORDANCE         | Lindsay EA, Harvey EL, Scambler PJ, Baldini A. "ES2, a gene deleted in DiGeorge syndrome, encodes a nuclear protein and is expressed during early mouse development, where it shares an expression domain with a Goosecoid-like gene." <i>Hum Mol Genet</i> 1998 Apr,7(4):629-35                                                                                                                                                   |
| T36864      | NM_001001320     | Tbx10                | NP                  |                                                                                                                                                                                                                                                                                                                                                                                                                                    |
| T38784      | NM_008022        | Foxd4                | NP                  |                                                                                                                                                                                                                                                                                                                                                                                                                                    |
| T40239      | XM_989876        | 4631416L12Rik        | NP                  |                                                                                                                                                                                                                                                                                                                                                                                                                                    |
| T3799       | NM_023438        | Gm644                | NP                  |                                                                                                                                                                                                                                                                                                                                                                                                                                    |
| T5619       | NM_026012        | Nradd                | NP                  |                                                                                                                                                                                                                                                                                                                                                                                                                                    |
| T35259      | NM_013582        | Lhcar                | NP                  |                                                                                                                                                                                                                                                                                                                                                                                                                                    |
| T35827      | NM_177358        | A630033E08Rik        | NP                  |                                                                                                                                                                                                                                                                                                                                                                                                                                    |
| T35828      | NM_177255        | A630052C17Rik        | NP                  |                                                                                                                                                                                                                                                                                                                                                                                                                                    |
| T36821      | XM_486090        | Nkx6-3               | PARTIAL CONCORDANCE | Alanentalo T, Chatonnet F, Karlen M, Sulniute R, Ericson J, Andersson E, Ahlgren U. "Cloning and analysis of Nkx6.3 during CNS and gastrointestinal development." <i>Gene Expr Patterns</i> 2006 Jan,6(2):162-70<br>Pedersen JK, Nelson SB, Jorgensen MC, Henseleit KD, Fujitani Y, Wright CV, Sander M, Serup P. "Endodermal expression of Nkx6 genes depends differentially on Pdx1." <i>Dev Biol</i> 2005 Dec 15,288(2):487-501 |
| T36197      | NM_170597        | Creg2                | NP                  |                                                                                                                                                                                                                                                                                                                                                                                                                                    |
| T31600      | NM_181315        | Car5b                | PARTIAL CONCORDANCE | Cankaya M, Hernandez AM, Ciftci M, Beydemir S, Ozdemir H, Budak H, Gulcin I, Comakli V, Emircupani T, Ekinci D, Kuzu M, Jiang Q, Eichele G, Kufrevioglu OI. "An analysis of expression patterns of genes encoding proteins with catalytic activities." <i>BMC Genomics</i> 2007,8():232                                                                                                                                            |
| T31319      | NM_028248        | 2610301K12Rik        | NP                  |                                                                                                                                                                                                                                                                                                                                                                                                                                    |
| T38668      | NM_010586        | Itpr2                | NP                  |                                                                                                                                                                                                                                                                                                                                                                                                                                    |
| T5360       | NM_008265        | Hoxa4                | NP                  |                                                                                                                                                                                                                                                                                                                                                                                                                                    |
| T5313       | NM_010454        | Hoxa6                | NP                  |                                                                                                                                                                                                                                                                                                                                                                                                                                    |
| T3054       | NM_144544        | 2210407C18Rik        | NP                  |                                                                                                                                                                                                                                                                                                                                                                                                                                    |
| T36034      | NM_181422        | Pkd2l1               | NP                  |                                                                                                                                                                                                                                                                                                                                                                                                                                    |
| T36325      | NM_139293        | Ece2                 | NP                  |                                                                                                                                                                                                                                                                                                                                                                                                                                    |
| T35172      | NM_177330        | Ghsr                 | NP                  |                                                                                                                                                                                                                                                                                                                                                                                                                                    |
| T35853      | NM_175352        | AA407659             | NP                  |                                                                                                                                                                                                                                                                                                                                                                                                                                    |
| T37251      | NM_027401        | 1700010C24Rik        | NP                  |                                                                                                                                                                                                                                                                                                                                                                                                                                    |
| T30543      | NM_016663        | Syt3                 | PARTIAL CONCORDANCE | Visel A, Thaller C, Eichele G. "GenePaint.org: an atlas of gene expression patterns in the mouse embryo." <i>Nucleic Acids Res</i> 2004 Jan 1,32(Database issue):D552-6S,                                                                                                                                                                                                                                                          |
| T38441      | NM_008226        | Hcn2                 | NP                  |                                                                                                                                                                                                                                                                                                                                                                                                                                    |
| T37397      | XM_916223        | 4931429I11Rik        | NP                  |                                                                                                                                                                                                                                                                                                                                                                                                                                    |
| T31587      | NM_026013        | Tmem77               | NP                  |                                                                                                                                                                                                                                                                                                                                                                                                                                    |
| T38192      | NM_138948        | Calbp7               | NP                  |                                                                                                                                                                                                                                                                                                                                                                                                                                    |
| T40298      | AK015488         | 4930459I23Rik        | NP                  |                                                                                                                                                                                                                                                                                                                                                                                                                                    |
| T39753      | AK083519         | D030040B21           | NP                  |                                                                                                                                                                                                                                                                                                                                                                                                                                    |
| T45276      | NM_145579        | P42pop               | NP                  |                                                                                                                                                                                                                                                                                                                                                                                                                                    |
| T70096      | MIMAT0005292     | mmu-miR-582-3p       | NP                  |                                                                                                                                                                                                                                                                                                                                                                                                                                    |
| T70406      | MIMAT000567      | mmu-miR-329          | NP                  |                                                                                                                                                                                                                                                                                                                                                                                                                                    |
| T4202       | NM_028207        | Dusp3                | NP                  |                                                                                                                                                                                                                                                                                                                                                                                                                                    |
| T632        | NM_029031        | Car1l                | NP                  |                                                                                                                                                                                                                                                                                                                                                                                                                                    |
| T4705       | NM_019443        | Ndufa1               | NP                  |                                                                                                                                                                                                                                                                                                                                                                                                                                    |

|        |              |               |                        |                                                                                                                                                                                                                                |
|--------|--------------|---------------|------------------------|--------------------------------------------------------------------------------------------------------------------------------------------------------------------------------------------------------------------------------|
| T5592  | NM_176848    | Fbxo2         | PARTIAL<br>CONCORDANCE | Hagens O, Minina E, Schweiger S, Ropers HH, Kalscheuer V. "Characterization of FBX25, encoding a novel brain-expressed F-box protein." <i>Biochim Biophys Acta</i> 2006 Jan,1760(1):110-8                                      |
| T35378 | NM_175198    | 1700058C01Rik | NP                     |                                                                                                                                                                                                                                |
| T35883 | NM_009620    | Adam4         | NP                     |                                                                                                                                                                                                                                |
| T36751 | NM_053144    | Pcdhb19       | NP                     |                                                                                                                                                                                                                                |
| T36312 | XM_917279    | Lavn          | NP                     |                                                                                                                                                                                                                                |
| T35839 | NM_177045    | Cc2d1b        | NP                     |                                                                                                                                                                                                                                |
| T36635 | NM_001033339 | Mmp25         | NP                     |                                                                                                                                                                                                                                |
| T37022 | NM_011390    | Slc12a7       | NP                     |                                                                                                                                                                                                                                |
| T30923 | NM_138650    | Dgkg          | CONCORDANCE            | Visel A, Thaller C, Eichele G. "GenePaint.org: an atlas of gene expression patterns in the mouse embryo." <i>Nucleic Acids Res</i> 2004 Jan 1,32(Database issue):D552-6                                                        |
| T32139 | NM_133914    | Rasa4         | NP                     |                                                                                                                                                                                                                                |
| T37566 | NM_181728    | Art3          | NP                     |                                                                                                                                                                                                                                |
| T39008 | NM_178651    | Slc30a9       | NP                     |                                                                                                                                                                                                                                |
| T39034 | NM_021332    | Gli1r         | NP                     |                                                                                                                                                                                                                                |
| T37560 | NM_177781    | Trpa1         | NP                     |                                                                                                                                                                                                                                |
| T30023 | NM_009831    | Ccna1         | NP                     |                                                                                                                                                                                                                                |
| T37051 | NM_172841    | Slco5a1       | NP                     |                                                                                                                                                                                                                                |
| T37651 | NM_029879    | D13Bwg1146e   | NP                     |                                                                                                                                                                                                                                |
| T31259 | NM_145497    | BC016495      | NP                     |                                                                                                                                                                                                                                |
| T37063 | NM_198214    | Snph          | NP                     |                                                                                                                                                                                                                                |
| T40474 | AK083647     | D030059C06Rik | NP                     |                                                                                                                                                                                                                                |
| T40506 | AK004446     | 1190002E22Rik | NP                     |                                                                                                                                                                                                                                |
| T35036 | XM_134539    | 2310031A18Rik | NP                     |                                                                                                                                                                                                                                |
| T3272  | NM_012026    | Ranf          | NP                     |                                                                                                                                                                                                                                |
| T8010  | NM_008213    | Hand1         | PARTIAL<br>CONCORDANCE | Cserjesi P; Brown D; Lyons GE; Olson EN. "Expression of the novel basic helix-loop-helix gene eHAND in neural crest derivatives and extraembryonic membranes during mouse development." <i>Dev Biol</i> 1995 Aug;170(2):664-78 |
| T3514  | NM_172451    | Galnt6        | NP                     |                                                                                                                                                                                                                                |
| T35962 | NM_009726    | Atp7a         | NP                     |                                                                                                                                                                                                                                |
| T1499  | NM_177226    | Zfp629        | NP                     |                                                                                                                                                                                                                                |
| T3628  | NM_144817    | Camk1q        | NP                     |                                                                                                                                                                                                                                |
| T3678  | NM_134022    | 6330403K07Rik | NP                     |                                                                                                                                                                                                                                |
| T1199  | NM_019806    | Vapb          | NP                     |                                                                                                                                                                                                                                |
| T5536  | NM_023397    | 1810034K20Rik | NP                     |                                                                                                                                                                                                                                |
| T3282  | NM_026552    | Arpc4         | NP                     |                                                                                                                                                                                                                                |
| T3389  | NM_025947    | Dncl2a        | NP                     |                                                                                                                                                                                                                                |
| T3378  | NM_177262    | Pkn1          | NP                     |                                                                                                                                                                                                                                |
| T7848  | NM_178358    | Lhfp11        | NP                     |                                                                                                                                                                                                                                |
| T3053  | NM_009894    | Cideb         | NP                     |                                                                                                                                                                                                                                |
| T35608 | NM_026622    | 3110057O12Rik | NP                     |                                                                                                                                                                                                                                |
| T36442 | NM_010305    | Gnai1         | NP                     |                                                                                                                                                                                                                                |
| T45437 | NM_199365    | 5330438I03Rik | NP                     |                                                                                                                                                                                                                                |
| T70297 | MIMAT0000215 | mmu-miR-186   | NP                     |                                                                                                                                                                                                                                |
| T992   | NM_026009    | 2610204L23Rik | NP                     |                                                                                                                                                                                                                                |
| T4565  | NM_025884    | Ccdc16        | NP                     |                                                                                                                                                                                                                                |
| T4570  | NM_027231    | Polr2f        | NP                     |                                                                                                                                                                                                                                |
| T1153  | NM_126166    | Tlr3          | NP                     |                                                                                                                                                                                                                                |
| T6034  | NM_025297    | Nrbf1         | NP                     |                                                                                                                                                                                                                                |
| T5194  | NM_025920    | Thap4         | NP                     |                                                                                                                                                                                                                                |
| T3931  | NM_019870    | Ard1          | NP                     |                                                                                                                                                                                                                                |
| T994   | NM_023167    | Mrpl4         | NP                     |                                                                                                                                                                                                                                |
| T1053  | NM_007991    | Fbl           | NP                     |                                                                                                                                                                                                                                |
| T4266  | NM_181410    | Gtf2h3        | NP                     |                                                                                                                                                                                                                                |
| T4653  | NM_146238    | BC023488      | NP                     |                                                                                                                                                                                                                                |
| T4654  | NM_025644    | Exosc1        | NP                     |                                                                                                                                                                                                                                |
| T4649  | NM_025298    | Polr3e        | NP                     |                                                                                                                                                                                                                                |
| T4839  | NM_020483    | Hcnap         | NP                     |                                                                                                                                                                                                                                |
| T4699  | NM_026421    | 2310057D15Rik | NP                     |                                                                                                                                                                                                                                |
| T4918  | NM_172049    | Tmem18        | NP                     |                                                                                                                                                                                                                                |
| T6193  | NM_144829    | 2310044P18Rik | NP                     |                                                                                                                                                                                                                                |
| T6824  | NM_133756    | Xab1          | NP                     |                                                                                                                                                                                                                                |
| T6826  | NM_025567    | Cyc1          | NP                     |                                                                                                                                                                                                                                |
| T6808  | NM_145386    | BC005655      | NP                     |                                                                                                                                                                                                                                |
| T8575  | NM_029418    | 9130401M01Rik | NP                     |                                                                                                                                                                                                                                |
| T8298  | NM_053113    | Ear11         | NP                     |                                                                                                                                                                                                                                |
| T35764 | NM_177136    | 9030227G01Rik | NP                     |                                                                                                                                                                                                                                |
| T7090  | NM_053168    | Trim11        | NO CONCORDANCE         | Hong SJ, Chae H, Lardaro T, Hong S, Kim KS. "Trim11 increases expression of dopamine beta-hydroxylase gene by interacting with Phox2b." <i>Biochem Biophys Res Commun</i> 2008 Apr 11,368(3):650-5                             |
| T7340  | NM_019910    | Dcdp          | NP                     |                                                                                                                                                                                                                                |
| T8417  | NM_026744    | Mrpl53        | NP                     |                                                                                                                                                                                                                                |
| T36466 | NM_010411    | Hdac3         | NP                     |                                                                                                                                                                                                                                |
| T31763 | NM_023197    | 2310008H09Rik | NP                     |                                                                                                                                                                                                                                |
| T36482 | NM_010489    | Hyal2         | NP                     |                                                                                                                                                                                                                                |
| T30449 | NM_028604    | 2410075D05Rik | NP                     |                                                                                                                                                                                                                                |
| T45583 | NM_028274    | Exosc6        | NP                     |                                                                                                                                                                                                                                |
| T39150 | NM_053170    | Trim33        | NP                     |                                                                                                                                                                                                                                |
| T38409 | XM_109726    | Thrap1        | NP                     |                                                                                                                                                                                                                                |
| T39614 | Y15800       | Gprk6         | NP                     |                                                                                                                                                                                                                                |
| T40565 | NM_001040026 | Sco1          | NP                     |                                                                                                                                                                                                                                |
| T40143 | AK013632     | LOC434446     | NP                     |                                                                                                                                                                                                                                |
| T40477 | AK156793     | Dnaic11       | NP                     |                                                                                                                                                                                                                                |
| T63207 | NM_178640    | B3galnt2      | NP                     |                                                                                                                                                                                                                                |
| T63369 | NM_207239    | Gtf3c1        | NP                     |                                                                                                                                                                                                                                |
| T35071 | XM_135805    | Wdr44         | NP                     |                                                                                                                                                                                                                                |
| T7055  | NM_146236    | Tceal1        | NP                     |                                                                                                                                                                                                                                |
| T37506 | NM_175511    | A130092J06Rik | NP                     |                                                                                                                                                                                                                                |
| T37713 | NM_027402    | Fndc5         | NP                     |                                                                                                                                                                                                                                |
| T39931 | AK044039     | LOC432809     | NP                     |                                                                                                                                                                                                                                |
| T2189  | NM_029320    | D14Ert581e    | NP                     |                                                                                                                                                                                                                                |
| T30549 | NM_178711    | Plscr4        | NP                     |                                                                                                                                                                                                                                |
| T30424 | NM_148942    | Serpnb6c      | NP                     |                                                                                                                                                                                                                                |
| T3497  | NM_001012392 | U46068        | CONCORDANCE            | Hou J, Yashiro K, Okazaki Y, Saijoh Y, Hayashizaki Y, Hamada H. "Identification of a novel left-right asymmetrically expressed gene in the mouse belonging to the BPI/PLUNC superfamily." <i>Dev Dyn</i> 2004 Mar;229(2):373-9 |
| T5284  | NM_145469    | 9330161F08Rik | NP                     |                                                                                                                                                                                                                                |
| T35959 | NM_009724    | Atp4b         | NP                     |                                                                                                                                                                                                                                |
| T37359 | NM_030181    | Vsig1         | NP                     |                                                                                                                                                                                                                                |
| T37452 | NM_025684    | 5730521E12Rik | CONCORDANCE            | Li X, Udager AM, Hu C, Qiao XT, Richards N, Gumucio DL. "Dynamic patterning at the pylorus: Formation of an epithelial intestine-stomach boundary in late fetal life." <i>Dev Dyn</i> 2009 Oct 29,238(12):3205-3217            |
| T37039 | NM_053248    | Slc5a5        | NP                     |                                                                                                                                                                                                                                |
| T31264 | NM_027299    | Deqs2         | NP                     |                                                                                                                                                                                                                                |
| T37839 | NM_001033366 | Dpcr1         | NP                     |                                                                                                                                                                                                                                |
| T6200  | NM_010893    | Neu1          | NP                     |                                                                                                                                                                                                                                |
| T8444  | NM_138646    | Hps4          | NP                     |                                                                                                                                                                                                                                |
| T7375  | NM_178308    | Abpa          | NP                     |                                                                                                                                                                                                                                |
| T4828  | NM_145932    | D630035O19Rik | NP                     |                                                                                                                                                                                                                                |
| T35459 | NM_013920    | Hnf4g         | NP                     |                                                                                                                                                                                                                                |
| T36820 | XM_134330    | Isx           | NP                     |                                                                                                                                                                                                                                |

|        |  |              |               |                     |                                                                                                                                                                                                                                                                                                                                     |
|--------|--|--------------|---------------|---------------------|-------------------------------------------------------------------------------------------------------------------------------------------------------------------------------------------------------------------------------------------------------------------------------------------------------------------------------------|
| T36216 |  | XM_130038    | Cubn          | NP                  |                                                                                                                                                                                                                                                                                                                                     |
| T36195 |  | XM_129769    | Cps1          | NP                  |                                                                                                                                                                                                                                                                                                                                     |
| T31175 |  | NM_010739    | Muc13         | NP                  |                                                                                                                                                                                                                                                                                                                                     |
| T31255 |  | NM_144807    | Chpt1         | NP                  |                                                                                                                                                                                                                                                                                                                                     |
| T38238 |  | NM_027339    | 2210415F13Rik | NP                  |                                                                                                                                                                                                                                                                                                                                     |
| T37860 |  | NM_001011873 | Xkr9          | NP                  |                                                                                                                                                                                                                                                                                                                                     |
| T39400 |  | XR_003553    | LOC671753     | NP                  |                                                                                                                                                                                                                                                                                                                                     |
| T2987  |  | NM_027307    | Golph2        | NP                  |                                                                                                                                                                                                                                                                                                                                     |
| T2287  |  | NM_028189    | B3qnt3        | NP                  |                                                                                                                                                                                                                                                                                                                                     |
| T32098 |  | NM_007769    | Dmbt1         | NP                  |                                                                                                                                                                                                                                                                                                                                     |
| T37786 |  | XM_923886    | Gm53          | NP                  |                                                                                                                                                                                                                                                                                                                                     |
| T1660  |  | NM_011280    | Trim10        | NP                  |                                                                                                                                                                                                                                                                                                                                     |
| T452   |  | NM_146173    | 1300010A20Rik | NP                  |                                                                                                                                                                                                                                                                                                                                     |
| T3791  |  | NM_153567    | 5033405K12Rik | NP                  |                                                                                                                                                                                                                                                                                                                                     |
| T800   |  | NM_172759    | Ces5          | NP                  |                                                                                                                                                                                                                                                                                                                                     |
| T855   |  | NM_009127    | Scd1          | NP                  |                                                                                                                                                                                                                                                                                                                                     |
| T518   |  | NM_008934    | Proc          | NP                  |                                                                                                                                                                                                                                                                                                                                     |
| T887   |  | NM_010168    | F2            | NP                  |                                                                                                                                                                                                                                                                                                                                     |
| T867   |  | NM_133977    | Trf           | CONCORDANCE         | Zhou Q, Law AC, Rajagopal J, Anderson WJ, Gray PA, Melton DA. "A multipotent progenitor domain guides pancreatic organogenesis." Dev Cell 2007 Jul,13(1):103-14                                                                                                                                                                     |
| T1441  |  | NM_008777    | Pah           | NP                  |                                                                                                                                                                                                                                                                                                                                     |
| T113   |  | NM_011270    | Rhced         | NP                  |                                                                                                                                                                                                                                                                                                                                     |
| T928   |  | NM_023383    | Aadac         | NP                  |                                                                                                                                                                                                                                                                                                                                     |
| T882   |  | NM_008124    | Gib1          | NP                  |                                                                                                                                                                                                                                                                                                                                     |
| T1032  |  | NM_008878    | Serpinf2      | NP                  |                                                                                                                                                                                                                                                                                                                                     |
| T3836  |  | NM_138678    | Butr1         | NP                  |                                                                                                                                                                                                                                                                                                                                     |
| T1017  |  | NM_013782    | Ptdss2        | NP                  |                                                                                                                                                                                                                                                                                                                                     |
| T3940  |  | NM_019687    | Slc22a4       | NP                  |                                                                                                                                                                                                                                                                                                                                     |
| T4696  |  | NM_007931    | Endoq         | NP                  |                                                                                                                                                                                                                                                                                                                                     |
| T2929  |  | NM_020583    | Isq20         | NP                  |                                                                                                                                                                                                                                                                                                                                     |
| T2794  |  | NM_008198    | H2-Bf         | NP                  |                                                                                                                                                                                                                                                                                                                                     |
| T4763  |  | NM_172577    | Slc25a21      | NP                  |                                                                                                                                                                                                                                                                                                                                     |
| T4783  |  | NM_010006    | Cyp2d9        | NP                  |                                                                                                                                                                                                                                                                                                                                     |
| T4794  |  | NM_146148    | C8a           | NP                  |                                                                                                                                                                                                                                                                                                                                     |
| T4813  |  | NM_174870    | Slc26a1       | NP                  |                                                                                                                                                                                                                                                                                                                                     |
| T4015  |  | NM_029269    | Spp2          | NP                  |                                                                                                                                                                                                                                                                                                                                     |
| T1352  |  | NM_174846    | 6230410P16Rik | NP                  |                                                                                                                                                                                                                                                                                                                                     |
| T3113  |  | NM_008385    | Inpp5b        | NP                  |                                                                                                                                                                                                                                                                                                                                     |
| T4399  |  | NM_016956    | Hbb-b2        | NP                  |                                                                                                                                                                                                                                                                                                                                     |
| T4928  |  | NM_008280    | Lipc          | NP                  |                                                                                                                                                                                                                                                                                                                                     |
| T4954  |  | NM_009778    | C3            | NP                  |                                                                                                                                                                                                                                                                                                                                     |
| T4955  |  | NM_007376    | Pzp           | CONCORDANCE         | Lorent K, Overbergh L, Delabie J, Van Leuven F, Van den Berghe H. "Distribution of mRNA coding for alpha-2-macroglobulin, the murinoglobulins, the alpha-2-macroglobulin receptor and the alpha-2-macroglobulin receptor associated protein during mouse embryogenesis and in adult tissues." Differentiation 1994 Feb,55(3):213-23 |
| T705   |  | NM_013474    | Apoa2         | CONCORDANCE         | Visel A, Thaller C, Eichele G. "GenePaint.org: an atlas of gene expression patterns in the mouse embryo." Nucleic Acids Res 2004 Jan 1,32(Database issue):D552-6                                                                                                                                                                    |
| T647   |  | NM_009695    | Apoc2         | NP                  |                                                                                                                                                                                                                                                                                                                                     |
| T715   |  | NM_023530    | Pla2g12b      | NP                  |                                                                                                                                                                                                                                                                                                                                     |
| T5324  |  | NM_001033981 | LOC544763     | NP                  |                                                                                                                                                                                                                                                                                                                                     |
| T5508  |  | NM_025988    | Acbd4         | NP                  |                                                                                                                                                                                                                                                                                                                                     |
| T6010  |  | NM_013551    | Hmbs          | NP                  |                                                                                                                                                                                                                                                                                                                                     |
| T6020  |  | NM_010196    | Fga           | NP                  |                                                                                                                                                                                                                                                                                                                                     |
| T1930  |  | NM_145824    | Ranbp10       | NP                  |                                                                                                                                                                                                                                                                                                                                     |
| T914   |  | NM_013475    | Apoh          | NP                  |                                                                                                                                                                                                                                                                                                                                     |
| T201   |  | NM_153143    | Kctd11        | NP                  |                                                                                                                                                                                                                                                                                                                                     |
| T1576  |  | NM_026157    | Papd1         | NP                  |                                                                                                                                                                                                                                                                                                                                     |
| T4729  |  | NM_017366    | Acadvl        | NP                  |                                                                                                                                                                                                                                                                                                                                     |
| T4876  |  | NM_144916    | BC014685      | NP                  |                                                                                                                                                                                                                                                                                                                                     |
| T4914  |  | NM_133997    | Apof          | NP                  |                                                                                                                                                                                                                                                                                                                                     |
| T4916  |  | NM_144869    | BC021614      | NP                  |                                                                                                                                                                                                                                                                                                                                     |
| T4901  |  | NM_021489    | F12           | NP                  |                                                                                                                                                                                                                                                                                                                                     |
| T4900  |  | NM_018816    | Apom          | NP                  |                                                                                                                                                                                                                                                                                                                                     |
| T918   |  | NM_009060    | Rgn           | CONCORDANCE         | Keith Ho HC, McGrath KE, Brodbeck KC, Palis J, Schick BP. "Serglycin proteoglycan synthesis in the murine uterine decidua and early embryo." Biol Reprod 2001 Jun,64(6):1667-76                                                                                                                                                     |
| T6813  |  | NM_011787    | Amfr          | NP                  |                                                                                                                                                                                                                                                                                                                                     |
| T6738  |  | NM_011804    | Cred1         | NP                  |                                                                                                                                                                                                                                                                                                                                     |
| T7396  |  | NM_028066    | F11           | NP                  |                                                                                                                                                                                                                                                                                                                                     |
| T6633  |  | NM_144533    | Nmnat3        | NP                  |                                                                                                                                                                                                                                                                                                                                     |
| T7241  |  | NM_008341    | Igfbbp1       | NP                  |                                                                                                                                                                                                                                                                                                                                     |
| T4958  |  | NM_019447    | Hqfac         | NP                  |                                                                                                                                                                                                                                                                                                                                     |
| T4997  |  | NM_144805    | Tmem40        | NO CONCORDANCE      | Thut CJ, Rountree RB, Hwa M, Kingsley DM. "A large-scale in situ screen provides molecular evidence for the induction of eye anterior segment structures by the developing lens." Dev Biol 2001 Mar 1,231(1):63-76                                                                                                                  |
| T4937  |  | NM_080844    | Serpinc1      | NP                  |                                                                                                                                                                                                                                                                                                                                     |
| T4953  |  | NM_130452    | Bbox1         | NP                  |                                                                                                                                                                                                                                                                                                                                     |
| T7876  |  | NM_013711    | Txnrd2        | NP                  |                                                                                                                                                                                                                                                                                                                                     |
| T6096  |  | NM_144923    | Blvrb         | NP                  |                                                                                                                                                                                                                                                                                                                                     |
| T7438  |  | NM_017371    | Hpxn          | NP                  |                                                                                                                                                                                                                                                                                                                                     |
| T7460  |  | NM_022884    | Bhmt2         | NP                  |                                                                                                                                                                                                                                                                                                                                     |
| T7462  |  | NM_008439    | Khk           | NP                  |                                                                                                                                                                                                                                                                                                                                     |
| T8819  |  | NM_172406    | Als2cr3       | NP                  |                                                                                                                                                                                                                                                                                                                                     |
| T8827  |  | NM_013848    | Ermapp        | CONCORDANCE         | Ye TZ, Gordon CT, Lai YH, Fujiwara Y, Peters LL, Perkins AC, Chui DH. "Ermap, a gene coding for a novel erythroid specific adhesion/receptor membrane protein." Gene 2000 Jan 25,242(1-2):337-45                                                                                                                                    |
| T8327  |  | NM_011414    | Slpi          | NP                  |                                                                                                                                                                                                                                                                                                                                     |
| T9595  |  | NM_207204    | 4930519N13Rik | NP                  |                                                                                                                                                                                                                                                                                                                                     |
| T6101  |  | NM_009775    | Bzrp          | CONCORDANCE         | Visel A, Thaller C, Eichele G. "GenePaint.org: an atlas of gene expression patterns in the mouse embryo." Nucleic Acids Res 2004 Jan 1,32(Database issue):D552-6                                                                                                                                                                    |
| T7233  |  | NM_009690    | Cd5l          | NP                  |                                                                                                                                                                                                                                                                                                                                     |
| T2656  |  | NM_013484    | C2            | NP                  |                                                                                                                                                                                                                                                                                                                                     |
| T9775  |  | NM_053149    | Hemgn         | CONCORDANCE         | Yang LV, Nicholson RH, Kaplan J, Galy A, Li L. "Hemogen is a novel nuclear factor specifically expressed in mouse hematopoietic development and its human homologue EDAG maps to chromosome 9q22, a region containing breakpoints of hematological neoplasms." Mech Dev 2001 Jun,104(1-2):105-11                                    |
| T10041 |  | NM_008223    | Serpind1      | NP                  |                                                                                                                                                                                                                                                                                                                                     |
| T9535  |  | NM_009479    | Uros          | NP                  |                                                                                                                                                                                                                                                                                                                                     |
| T103   |  | NM_145365    | Creb3l3       | PARTIAL CONCORDANCE | Li X, Udager AM, Hu C, Qiao XT, Richards N, Gumucio DL. "Dynamic patterning at the pylorus: Formation of an epithelial intestine-stomach boundary in late fetal life." Dev Dyn 2009 Oct 29,238(12):3205-3217                                                                                                                        |
| T544   |  | NM_010799    | Minpp1        | CONCORDANCE         | Chi H, Yang X, Kingsley PD, O'Keefe RJ, Puzas JE, Rosier RN, Shears SB, Reynolds PR. "Targeted deletion of Minpp1 provides new insight into the activity of multiple inositol polyphosphate phosphatase in vivo." Mol Cell Biol 2000 Sep,20(17):6496-507                                                                            |
| T659   |  | NM_012053    | Rpl8          | NP                  |                                                                                                                                                                                                                                                                                                                                     |
| T572   |  | NM_031164    | F13b          | NP                  |                                                                                                                                                                                                                                                                                                                                     |
| T663   |  | NM_008406    | Itih1         | NP                  |                                                                                                                                                                                                                                                                                                                                     |
| T6652  |  | NM_026635    | 5730536A07Rik | NP                  |                                                                                                                                                                                                                                                                                                                                     |

|        |              |               |                     |                                                                                                                                                                                                                                                                                                    |
|--------|--------------|---------------|---------------------|----------------------------------------------------------------------------------------------------------------------------------------------------------------------------------------------------------------------------------------------------------------------------------------------------|
| T8083  | NM_008114    | Gfi1b         | NP                  |                                                                                                                                                                                                                                                                                                    |
| T7377  | NM_011822    | Piqg          | NP                  |                                                                                                                                                                                                                                                                                                    |
| T7388  | NM_008277    | Hpd           | PARTIAL CONCORDANCE | Ruchon AF, Marcinkiewicz M, Siegfried G, Tenenhouse HS, DesGroseillers L, Crine P, Boileau G. "Pex mRNA is localized in developing mouse osteoblasts and odontoblasts." <i>J Histochem Cytochem</i> 1998 Apr;46(4):459-68                                                                          |
| T7065  | NM_027868    | Slc41a3       | NP                  |                                                                                                                                                                                                                                                                                                    |
| T6647  | NM_008522    | Ltf           | NP                  |                                                                                                                                                                                                                                                                                                    |
| T6734  | NM_019687    | Slc22a4       | NP                  |                                                                                                                                                                                                                                                                                                    |
| T4533  | NM_013547    | Hgd           | PARTIAL CONCORDANCE | Visel A, Thaller C, Eichele G. "GenePaint.org: an atlas of gene expression patterns in the mouse embryo." <i>Nucleic Acids Res</i> 2004 Jan 1,32(Database issue):D552-6                                                                                                                            |
| T50012 | NM_010509    | Ifnar2        | PARTIAL CONCORDANCE | Reymond A, Marigo V, Yaylaoglu MB, Leoni A, Ucla C, Scamuffa N, Caccioppoli C, Dermitzakis ET, Lyle R, Banfi S, Eichele G, Antonarakis SE, Ballabio A. "Human chromosome 21 gene expression atlas in the mouse." <i>Nature</i> 2002 Dec 5,420(6915):582-6                                          |
| T3028  | NM_007563    | Bpgm          | NP                  |                                                                                                                                                                                                                                                                                                    |
| T35297 | NM_011465    | Spona1        | NP                  |                                                                                                                                                                                                                                                                                                    |
| T35306 | NM_013838    | Trpc6         | NP                  |                                                                                                                                                                                                                                                                                                    |
| T35925 | NM_007440    | Alox12        | NO CONCORDANCE      | Sun D, McDonnell M, Chen XS, Lakkis MM, Li H, Isaacs SN, Elsea SH, Patel PI, Funk CD. Human 12(R)-lipoxygenase and the mouse ortholog. Molecular cloning, expression, and gene chromosomal assignment. <i>J Biol Chem</i> 1998 Dec 11,273(50):33540-7                                              |
| T36774 | NM_008823    | Cfp           | NP                  |                                                                                                                                                                                                                                                                                                    |
| T1370  | NM_007940    | Ephx2         | NP                  |                                                                                                                                                                                                                                                                                                    |
| T2632  | NM_134249    | Timd2         | NP                  |                                                                                                                                                                                                                                                                                                    |
| T36344 | NM_013513    | Epb4.2        | PARTIAL CONCORDANCE | Zhu L, Kahwash SB, Chang LS. "Developmental expression of mouse erythrocyte protein 4.2 mRNA: evidence for specific expression in erythroid cells." <i>B</i>                                                                                                                                       |
| T36357 | NM_007976    | F5            | NP                  |                                                                                                                                                                                                                                                                                                    |
| T36359 | NM_176935    | F730015K02Rik | NP                  |                                                                                                                                                                                                                                                                                                    |
| T35159 | NM_007975    | F2rl3         | NP                  |                                                                                                                                                                                                                                                                                                    |
| T35249 | NM_010605    | Kcni5         | NP                  |                                                                                                                                                                                                                                                                                                    |
| T35250 | NM_001033525 | Kcnk6         | NP                  |                                                                                                                                                                                                                                                                                                    |
| T35158 | NM_010170    | F2rl2         | NP                  |                                                                                                                                                                                                                                                                                                    |
| T1306  | NM_008877    | Plq           | NP                  |                                                                                                                                                                                                                                                                                                    |
| T1305  | NM_026673    | 0610008C08Rik | NP                  |                                                                                                                                                                                                                                                                                                    |
| T36422 | NM_008129    | Gclm          | PARTIAL CONCORDANCE | Diaz D, Krejsa CM, White CC, Charleston JS, Kavanagh TJ. "Effect of methylmercury on glutamate-cysteine ligase expression in the placenta and yolk sac during mouse development." <i>Reprod Toxicol</i> 2004 Nov,19(1):117-29                                                                      |
| T36685 | NM_008694    | Nqp           | NP                  |                                                                                                                                                                                                                                                                                                    |
| T36891 | NM_008920    | Prq2          | NP                  |                                                                                                                                                                                                                                                                                                    |
| T36894 | NM_016781    | Prkaq1        | NP                  |                                                                                                                                                                                                                                                                                                    |
| T36220 | NM_007807    | Cybb          | NP                  |                                                                                                                                                                                                                                                                                                    |
| T36962 | NM_011269    | Rhag          | NO CONCORDANCE      | Sansom SN, Griffiths DS, Faedo A, Kleinjan DJ, Ruan Y, Smith J, van Heyningen V, Rubenstein JL, Livesey FJ. "The level of the transcription factor Pax6 is essential for controlling the balance between neural stem cell self-renewal and neurogenesis." <i>PLoS Genet</i> 2009 Jun,5(6):e1000511 |
| T36371 | NM_030236    | Fbxo34        | NP                  |                                                                                                                                                                                                                                                                                                    |
| T37562 | XM_139463    | Apol2         | NP                  |                                                                                                                                                                                                                                                                                                    |
| T30515 | NM_010815    | Grap2         | NP                  |                                                                                                                                                                                                                                                                                                    |
| T30513 | NM_026464    | Wdr55         | NP                  |                                                                                                                                                                                                                                                                                                    |
| T30262 | NM_009146    | Frrs1         | NP                  |                                                                                                                                                                                                                                                                                                    |
| T30528 | NM_011461    | Spic          | NP                  |                                                                                                                                                                                                                                                                                                    |
| T30861 | NM_008525    | Alad          | NP                  |                                                                                                                                                                                                                                                                                                    |
| T31177 | NM_177564    | BC022224      | NP                  |                                                                                                                                                                                                                                                                                                    |
| T31242 | NM_181849    | Fob           | NP                  |                                                                                                                                                                                                                                                                                                    |
| T31238 | NM_010531    | Ii18bp        | NP                  |                                                                                                                                                                                                                                                                                                    |
| T36214 | NM_007800    | Ctsq          | NP                  |                                                                                                                                                                                                                                                                                                    |
| T36584 | NM_008491    | Lcn2          | NP                  |                                                                                                                                                                                                                                                                                                    |
| T36625 | NM_008572    | Mcpt8         | NP                  |                                                                                                                                                                                                                                                                                                    |
| T37518 | NM_177115    | 37682         | NP                  |                                                                                                                                                                                                                                                                                                    |
| T37548 | NM_026212    | Agpat2        | NO CONCORDANCE      | Visel A, Thaller C, Eichele G. "GenePaint.org: an atlas of gene expression patterns in the mouse embryo." <i>Nucleic Acids Res</i> 2004 Jan 1,32(Database issue):D552-6                                                                                                                            |
| T30120 | NM_016751    | Clec4f        | NP                  |                                                                                                                                                                                                                                                                                                    |
| T30968 | NM_023737    | Ehhadh        | NP                  |                                                                                                                                                                                                                                                                                                    |
| T31016 | NM_027062    | C8q           | NP                  |                                                                                                                                                                                                                                                                                                    |
| T31697 | NM_178713    | Aldh8a1       | CONCORDANCE         | Romand R, Kondo T, Fraulob V, Petkovich M, Dolle P, Hashino E. "Dynamic expression of retinoic acid-synthesizing and -metabolizing enzymes in the developing mouse inner ear." <i>J Comp Neurol</i> 2006 Jun 10,496(5):643-54                                                                      |
| T37082 | NM_138673    | Stab2         | NP                  |                                                                                                                                                                                                                                                                                                    |
| T36464 | NM_175000    | Hbq1          | NP                  |                                                                                                                                                                                                                                                                                                    |
| T37646 | NM_023785    | Cxcl7         | NP                  |                                                                                                                                                                                                                                                                                                    |
| T31265 | NM_178936    | Tmem56        | NP                  |                                                                                                                                                                                                                                                                                                    |
| T38059 | NM_178931    | Tnfrsf14      | NP                  |                                                                                                                                                                                                                                                                                                    |
| T31407 | NM_008254    | Hmocl         | NP                  |                                                                                                                                                                                                                                                                                                    |
| T38067 | NM_027763    | Trem1         | NP                  |                                                                                                                                                                                                                                                                                                    |
| T38095 | NM_023500    | Xkh           | NP                  |                                                                                                                                                                                                                                                                                                    |
| T31621 | NM_181420    | BC032265      | NP                  |                                                                                                                                                                                                                                                                                                    |
| T39081 | NM_133246    | Ms4a3         | NP                  |                                                                                                                                                                                                                                                                                                    |
| T39334 | XM_914077    | LOC545486     | NP                  |                                                                                                                                                                                                                                                                                                    |
| T39919 | NM_001033488 | Gm1964        | NP                  |                                                                                                                                                                                                                                                                                                    |
| T37793 | XM_001002626 | Gm323         | NP                  |                                                                                                                                                                                                                                                                                                    |
| T31656 | NM_019949    | Ube2l6        | NP                  |                                                                                                                                                                                                                                                                                                    |
| T39636 | NM_013730    | Slamf1        | NP                  |                                                                                                                                                                                                                                                                                                    |
| T37994 | NM_173051    | Serpnb1c      | NP                  |                                                                                                                                                                                                                                                                                                    |
| T63033 | NM_010575    | Itqa2b        | NP                  |                                                                                                                                                                                                                                                                                                    |
| T45073 | NM_010190    | Fcnb          | NP                  |                                                                                                                                                                                                                                                                                                    |
| T45189 | S66283       | Snnb1         | NP                  |                                                                                                                                                                                                                                                                                                    |
| T70034 | MIMAT0004870 | mmu-miR-453   | NP:microRNA         |                                                                                                                                                                                                                                                                                                    |
| T6962  | NM_133993    | Pwp1          | NP                  |                                                                                                                                                                                                                                                                                                    |
| T6275  | NM_080434    | Apoa5         | NP                  |                                                                                                                                                                                                                                                                                                    |
| T4913  | NM_054094    | Bucs1         | NP                  |                                                                                                                                                                                                                                                                                                    |
| T6471  | NM_019734    | Asah1         | NP                  |                                                                                                                                                                                                                                                                                                    |
| T6515  | NM_026434    | Rbm18         | NP                  |                                                                                                                                                                                                                                                                                                    |
| T6164  | NM_145442    | Mbip          | NO CONCORDANCE      | Tucker ES, Segall S, Gopalakrishna D, Wu Y, Vernon M, Polleux F, Lamantia ASJ. Molecular specification and patterning of progenitor cells in the lateral and medial ganglionic eminences. <i>J. Neurosci.</i> 2008 Sep 17,28(38):9504-18.                                                          |
| T2760  | NM_172372    | Wdr45         | NP                  |                                                                                                                                                                                                                                                                                                    |
| T8173  | NM_026812    | 1110033009Rik | NP                  |                                                                                                                                                                                                                                                                                                    |
| T7968  | NM_028798    | 2300002G24Rik | NP                  |                                                                                                                                                                                                                                                                                                    |
| T8216  | NM_008403    | Itqb1bp1      | NP                  |                                                                                                                                                                                                                                                                                                    |
| T9979  | NM_011359    | Sftpc         | NP                  |                                                                                                                                                                                                                                                                                                    |
| T48    | NM_011247    | Rbbp6         | NP                  |                                                                                                                                                                                                                                                                                                    |
| T36440 | XM_977462    | Gm632         | NP                  |                                                                                                                                                                                                                                                                                                    |
| T36888 | NM_138605    | Ppp1r3f       | NP                  |                                                                                                                                                                                                                                                                                                    |
| T36222 | NM_007814    | Cyp2b19       | NP                  |                                                                                                                                                                                                                                                                                                    |

|        |              |                |                     |                                                                                                                                                                                                                                                                                                 |
|--------|--------------|----------------|---------------------|-------------------------------------------------------------------------------------------------------------------------------------------------------------------------------------------------------------------------------------------------------------------------------------------------|
| T37377 | XM_485433    | 4930544015Rik  | NP                  |                                                                                                                                                                                                                                                                                                 |
| T37174 | NM_009417    | Tpo            | NO CONCORDANCE      | Meunier D, Aubin J, Jeannotte L. "Perturbed thyroid morphology and transient hypothyroidism symptoms in Hoxa5 mutant mice." Dev Dyn 2003 Jul;227(3):367-78                                                                                                                                      |
| T37797 | NM_001033246 | Gm172          | NP                  |                                                                                                                                                                                                                                                                                                 |
| T36519 | NM_172161    | Irak2          | NP                  |                                                                                                                                                                                                                                                                                                 |
| T39769 | AK034327     | 9330178D15     | NP                  |                                                                                                                                                                                                                                                                                                 |
| T472   | NM_026210    | 1810036I24Rik  | NP                  |                                                                                                                                                                                                                                                                                                 |
| T1670  | NM_013593    | Mb             | NP                  |                                                                                                                                                                                                                                                                                                 |
| T2081  | NM_146242    | Lrrc10         | NP                  |                                                                                                                                                                                                                                                                                                 |
| T1653  | NM_008726    | Nppb           | CONCORDANCE         | Cameron VA, Aitken GD, Ellmers LJ, Kennedy MA, Espiner EA. "The sites of gene expression of atrial, brain, and C-type natriuretic peptides in mouse fetal development: temporal changes in embryos and placenta." Endocrinology 1996 Mar;137(3):817-24                                          |
| T5933  | NM_008590    | Mest           | NP                  |                                                                                                                                                                                                                                                                                                 |
| T7325  | NM_008424    | Kcne1          | NP                  |                                                                                                                                                                                                                                                                                                 |
| T4941  | NM_026977    | 1810031K17Rik  | NP                  |                                                                                                                                                                                                                                                                                                 |
| T4371  | NM_145367    | Txndc5         | NP                  |                                                                                                                                                                                                                                                                                                 |
| T4400  | NM_011366    | Sh3d4          | NP                  |                                                                                                                                                                                                                                                                                                 |
| T6397  | NM_013483    | Btn1a1         | NP                  |                                                                                                                                                                                                                                                                                                 |
| T7934  | NM_011658    | Twist1         | PARTIAL CONCORDANCE | Bourgeois P, Bolcato-Bellemin AL, Danse JM, Bloch-Zupan A, Yoshida K, Stoetzel C, Perrin-Schmitt F. "The variable expressivity and incomplete penetrance of the twist-null heterozygous mouse phenotype resemble those of human Saethre-Chotzen syndrome." Hum Mol Genet 1998 Jun;7(6):945-57   |
| T9824  | NM_023129    | Pln            | NP                  |                                                                                                                                                                                                                                                                                                 |
| T4377  | NM_153805    | Pkn3           | NP                  |                                                                                                                                                                                                                                                                                                 |
| T10016 | NM_008725    | Nppa           | CONCORDANCE         | Zeller R, Bloch KD, Williams BS, Arceci RJ, Seidman CE. "Localized expression of the atrial natriuretic factor gene during cardiac embryogenesis." Genes Dev 1987 Sep;1(7):693-8                                                                                                                |
| T10015 | NM_013868    | Hspb7          | NP                  |                                                                                                                                                                                                                                                                                                 |
| T9977  | NM_010861    | Myl2           | CONCORDANCE         | Chuva de Sousa Lopes SM, Hassink RJ, Feijen A, van Rooijen MA, Doevendans PA, Tertoolen L, Brutel de la Riviere A, Mummery CL. "Patterning the heart, a template for human cardiomyocyte development." Dev Dyn 2006 Apr 28;235(7):1994-2002                                                     |
| T9973  | NM_009406    | Tnni3          | CONCORDANCE         | Mommersteeg MT, Brown NA, Prall OW, de Gier-de Vries C, Harvey RP, Moorman AF, Christoffels VM. "Pitx2c and Nkx2-5 are required for the formation and identity of the pulmonary myocardium." Circ Res 2007 Oct 26;101(9):902-9                                                                  |
| T9980  | NM_022879    | Myl7           | CONCORDANCE         | Kastner P, Messaddeq N, Mark M, Wendling O, Grondona JM, Ward S, Ghyselinck N, Chambon P. Vitamin A deficiency and mutations of RXRalpha, RXRbeta and RARalpha lead to early differentiation of embryonic ventricular cardiomyocytes., Development 1997 Dec;124(23):4749-58                     |
| T35348 | NM_026831    | Mvbp1          | NP                  |                                                                                                                                                                                                                                                                                                 |
| T45    | NM_028990    | 8430437G11Rik  | NP                  |                                                                                                                                                                                                                                                                                                 |
| T217   | NM_019750    | Nat6           | NP                  |                                                                                                                                                                                                                                                                                                 |
| T186   | NM_009400    | Tnfrsf18       | NP                  |                                                                                                                                                                                                                                                                                                 |
| T123   | NM_017470    | Dnalc4         | NP                  |                                                                                                                                                                                                                                                                                                 |
| T1523  | NM_178641    | Inpp5f         | NO CONCORDANCE      | Choi JD, Underkoffler LA, Wood AJ, Collins JN, Williams PT, Golden JA, Schuster EF Jr, Loomes KM, Oakley RJ. "A novel variant of inpp5f is imprinted in brain, and its expression is correlated with differential methylation of an internal CpG island." Mol Cell Biol 2005 Jul;25(13):5514-22 |
| T303   | NM_021443    | Ccl8           | NP                  |                                                                                                                                                                                                                                                                                                 |
| T1567  | NM_172383    | 6330530A05Rik  | NP                  |                                                                                                                                                                                                                                                                                                 |
| T30118 | NM_008965    | Ptger4         | NP                  |                                                                                                                                                                                                                                                                                                 |
| T37660 | NM_001033129 | D6Ert474e      | NP                  |                                                                                                                                                                                                                                                                                                 |
| T31276 | NM_145499    | Cvp2c70        | NP                  |                                                                                                                                                                                                                                                                                                 |
| T31371 | NM_007982    | Ptk2           | NP                  |                                                                                                                                                                                                                                                                                                 |
| T31391 | NM_053115    | Acox2          | NP                  |                                                                                                                                                                                                                                                                                                 |
| T31387 | NM_016922    | Gal3st1        | NP                  |                                                                                                                                                                                                                                                                                                 |
| T31390 | NM_145597    | Tmem161a       | NP                  |                                                                                                                                                                                                                                                                                                 |
| T31333 | XM_001003747 | 2010321M09Rik  | NP                  |                                                                                                                                                                                                                                                                                                 |
| T31354 | NM_010949    | Numb           | NP                  |                                                                                                                                                                                                                                                                                                 |
| T31310 | XM_001002673 | 0610007L01Rik  | NP                  |                                                                                                                                                                                                                                                                                                 |
| T38248 | NM_134048    | Cbll1          | NP                  |                                                                                                                                                                                                                                                                                                 |
| T39138 | NM_146417    | Olfir877       | NP                  |                                                                                                                                                                                                                                                                                                 |
| T38777 | NM_001004162 | LOC432436      | NP                  |                                                                                                                                                                                                                                                                                                 |
| T39388 | AJ278965     | Cd80           | NP                  |                                                                                                                                                                                                                                                                                                 |
| T40560 | XM_905672    | Apold1         | NP                  |                                                                                                                                                                                                                                                                                                 |
| T38815 | NM_139306    | Asah3l         | NP                  |                                                                                                                                                                                                                                                                                                 |
| T1777  | NM_010827    | Msc            | CONCORDANCE         | Robb L, Hartley L, Wang CC, Harvey RP, Begley CG. "musculin: a murine basic helix-loop-helix transcription factor gene expressed in embryonic skeletal muscle." Mech Dev 1998 Aug;76(1-2):197-201                                                                                               |
| T3345  | NM_029285    | 1700001C02Rik  | NP                  |                                                                                                                                                                                                                                                                                                 |
| T6874  | NM_011905    | Tlr2           | NP                  |                                                                                                                                                                                                                                                                                                 |
| T35464 | NM_008274    | Hoxd12         | CONCORDANCE         | Albrecht AN, Schwabe GC, Stricker S, Boddlich A, Wanker EE, Mundlos S. "The synpolydactyly homolog (spdh) mutation in the mouse -- a defect in patterning and growth of limb cartilage elements." Mech Dev 2002 Mar;112(1-2):53-67                                                              |
|        |              |                |                     | Dolle P, Izpisua-Belmonte JC, Falkenstein H, Renucci A, Duboule D. "Coordinate expression of the murine Hox-5 complex homeobox-containing genes during limb pattern formation." Nature 1989 Dec 14;342(6251):767-72                                                                             |
|        |              |                |                     | Duboule D. "The function of Hox genes in the morphogenesis of the vertebrate limb." Ann Genet 1993;36(1):24-9                                                                                                                                                                                   |
| T580   | NM_019950    | Chst5          | NP                  |                                                                                                                                                                                                                                                                                                 |
| T36606 | NM_010745    | Ly86           | NP                  |                                                                                                                                                                                                                                                                                                 |
| T36623 | NM_133197    | Mcf2           | NP                  |                                                                                                                                                                                                                                                                                                 |
| T37492 | NM_172904    | Fsd2           | NP                  |                                                                                                                                                                                                                                                                                                 |
| T63298 | NM_026866    | Disp1          | NO CONCORDANCE      | Rice R, Connor E, Rice DP. "Expression patterns of Hedgehog signalling pathway members during mouse palate development." Gene Expr Patterns 2006 Jan;6(2):206-12                                                                                                                                |
| T70079 | MIMAT0004940 | mmu-miR-511    | NP                  |                                                                                                                                                                                                                                                                                                 |
| T70081 | MIMAT0002889 | mmu-miR-532-5p | NP                  |                                                                                                                                                                                                                                                                                                 |
| T3537  | NM_198703    | Prkwnk1        | NP                  |                                                                                                                                                                                                                                                                                                 |
| T2205  | NM_144828    | Ppp1r1b        | NP                  |                                                                                                                                                                                                                                                                                                 |
| T1700  | NM_177693    | Lim2           | NP                  |                                                                                                                                                                                                                                                                                                 |
| T1555  | NM_020625    | Zfp297         | NP                  |                                                                                                                                                                                                                                                                                                 |
| T3639  | NM_023243    | Ccnh           | NP                  |                                                                                                                                                                                                                                                                                                 |
| T3619  | NM_139307    | Slit2          | NP                  |                                                                                                                                                                                                                                                                                                 |
| T814   | NM_013664    | Sh3gl1         | PARTIAL CONCORDANCE | So CW, Sham MH, Chew SL, Cheung N, So CK, Chung SK, Caldas C, Wiedemann LM, Chan LC. "Expression and protein-binding studies of the EEN gene family, new interacting partners for dynamin, synaptojanin and huntingtin proteins." Biochem J 2000 Jun 1;348 Pt 2():447-58                        |
| T858   | NM_025388    | Ufc1           | NP                  |                                                                                                                                                                                                                                                                                                 |
| T4520  | NM_178758    | C730027J19Rik  | NP                  |                                                                                                                                                                                                                                                                                                 |
| T2709  | NM_019575    | Scamp4         | NP                  |                                                                                                                                                                                                                                                                                                 |
| T4381  | NM_133831    | Giltscr2       | NP                  |                                                                                                                                                                                                                                                                                                 |
| T4425  | NM_026601    | Hyi            | NP                  |                                                                                                                                                                                                                                                                                                 |
| T5336  | NM_147097    | Olfir628       | NP                  |                                                                                                                                                                                                                                                                                                 |
| T6062  | NM_138668    | 1810047C23Rik  | NP                  |                                                                                                                                                                                                                                                                                                 |
| T3420  | NM_025448    | Ssr2           | NP                  |                                                                                                                                                                                                                                                                                                 |
| T2050  | NM_010098    | Opn3           | NP                  |                                                                                                                                                                                                                                                                                                 |

|        |              |               |                                           |                                                                                                                                                                                                                                                                                                                                                                                                                                                                                                                                                        |
|--------|--------------|---------------|-------------------------------------------|--------------------------------------------------------------------------------------------------------------------------------------------------------------------------------------------------------------------------------------------------------------------------------------------------------------------------------------------------------------------------------------------------------------------------------------------------------------------------------------------------------------------------------------------------------|
| T5133  | NM_172284    | Ddx19b        | NP                                        |                                                                                                                                                                                                                                                                                                                                                                                                                                                                                                                                                        |
| T5180  | NM_134058    | Pelo          | NP                                        |                                                                                                                                                                                                                                                                                                                                                                                                                                                                                                                                                        |
| T5899  | NM_053092    | Kars          | NP                                        |                                                                                                                                                                                                                                                                                                                                                                                                                                                                                                                                                        |
| T2289  | NM_025395    | Chchd5        | NP                                        |                                                                                                                                                                                                                                                                                                                                                                                                                                                                                                                                                        |
| T4713  | NM_025974    | Rpl14         | NP                                        |                                                                                                                                                                                                                                                                                                                                                                                                                                                                                                                                                        |
| T4905  | NM_172935    | 5730457F11Rik | NP                                        |                                                                                                                                                                                                                                                                                                                                                                                                                                                                                                                                                        |
| T1774  | NM_009666    | Amelx         | NP                                        |                                                                                                                                                                                                                                                                                                                                                                                                                                                                                                                                                        |
| T6421  | NM_009046    | Relb          | NO CONCORDANCE                            | Carrasco D, Ryseck RP, Bravo R. "Expression of relB transcripts during lymphoid organ development: specific expression in dendritic antigen-presenting cells." <i>Development</i> 1993 Aug,118(4):1221-31                                                                                                                                                                                                                                                                                                                                              |
| T5752  | NM_025903    | Ifrd2         | NP                                        |                                                                                                                                                                                                                                                                                                                                                                                                                                                                                                                                                        |
| T5801  | NM_011970    | Psmb2         | NP                                        |                                                                                                                                                                                                                                                                                                                                                                                                                                                                                                                                                        |
| T7659  | NM_025872    | Golt1b        | NP                                        |                                                                                                                                                                                                                                                                                                                                                                                                                                                                                                                                                        |
| T9604  | NM_015781    | Nap111        | NP                                        |                                                                                                                                                                                                                                                                                                                                                                                                                                                                                                                                                        |
| T4964  | NM_028769    | Syvn1         | NP                                        |                                                                                                                                                                                                                                                                                                                                                                                                                                                                                                                                                        |
| T2918  | NM_011354    | Serf2         | NP                                        |                                                                                                                                                                                                                                                                                                                                                                                                                                                                                                                                                        |
| T23    | NM_144787    | Jmid2c        | NP                                        |                                                                                                                                                                                                                                                                                                                                                                                                                                                                                                                                                        |
| T2872  | NM_026612    | Ndufb2        | NP                                        |                                                                                                                                                                                                                                                                                                                                                                                                                                                                                                                                                        |
| T37220 | NM_174877    | Zar1          | NP                                        |                                                                                                                                                                                                                                                                                                                                                                                                                                                                                                                                                        |
| T30261 | NM_016715    | Tpte2         | NP                                        |                                                                                                                                                                                                                                                                                                                                                                                                                                                                                                                                                        |
| T37477 | NM_001024926 | Cyb5d2        | NP                                        |                                                                                                                                                                                                                                                                                                                                                                                                                                                                                                                                                        |
| T37148 | NM_027865    | Tmem25        | NP                                        |                                                                                                                                                                                                                                                                                                                                                                                                                                                                                                                                                        |
| T30672 | NM_026000    | Psmd9         | NP                                        |                                                                                                                                                                                                                                                                                                                                                                                                                                                                                                                                                        |
| T37052 | NM_011408    | Sifn2         | NP                                        |                                                                                                                                                                                                                                                                                                                                                                                                                                                                                                                                                        |
| T38197 | NM_030137    | Cstad         | NP                                        |                                                                                                                                                                                                                                                                                                                                                                                                                                                                                                                                                        |
| T39901 | XM_894331    | EG629441      | NP                                        |                                                                                                                                                                                                                                                                                                                                                                                                                                                                                                                                                        |
| T39900 | AK038984     | LOC432449     | NP                                        |                                                                                                                                                                                                                                                                                                                                                                                                                                                                                                                                                        |
| T31673 | NM_007985    | Fancc         | NP                                        |                                                                                                                                                                                                                                                                                                                                                                                                                                                                                                                                                        |
| T39412 | NM_010748    | Lyst          | NP                                        |                                                                                                                                                                                                                                                                                                                                                                                                                                                                                                                                                        |
| T31828 | NM_025749    | Zfp474        | NP                                        |                                                                                                                                                                                                                                                                                                                                                                                                                                                                                                                                                        |
| T39450 | BC100377     | AU022751      | NP                                        |                                                                                                                                                                                                                                                                                                                                                                                                                                                                                                                                                        |
| T6124  | NM_007386    | Aco1          | NO CONCORDANCE                            | Cankaya M, Hernandez AM, Ciftci M, Beydemir S, Ozdemir H, Budak H, Gulcin I, Comakli V, Emircupani T, Ekinci D, Kuzu M, Jiang Q, Eichele G, Kufrevioglu OI. "An analysis of expression patterns of genes encoding proteins with catalytic activities." <i>BMC Genomics</i> 2007,8(1):232                                                                                                                                                                                                                                                               |
| T32146 | NM_172872    | Ankrd38       | NP                                        |                                                                                                                                                                                                                                                                                                                                                                                                                                                                                                                                                        |
| T35071 | XM_135805    | Wdr44         | NP                                        |                                                                                                                                                                                                                                                                                                                                                                                                                                                                                                                                                        |
| T7055  | NM_146236    | Tceal1        | NP                                        |                                                                                                                                                                                                                                                                                                                                                                                                                                                                                                                                                        |
| T37506 | NM_175511    | A130092J06Rik | NP                                        |                                                                                                                                                                                                                                                                                                                                                                                                                                                                                                                                                        |
| T37713 | NM_027402    | Fndc5         | NP                                        |                                                                                                                                                                                                                                                                                                                                                                                                                                                                                                                                                        |
| T5857  | NM_134011    | Tbrg4         | NP                                        |                                                                                                                                                                                                                                                                                                                                                                                                                                                                                                                                                        |
| T6305  | NM_175356    | Pik4cb        | NP                                        |                                                                                                                                                                                                                                                                                                                                                                                                                                                                                                                                                        |
| T6511  | NM_021524    | Pbef1         | NP                                        |                                                                                                                                                                                                                                                                                                                                                                                                                                                                                                                                                        |
| T6529  | NM_010209    | Fh1           | PARTIAL CONCORDANCE ALSO IN OTHER TISSUES | Cankaya M, Hernandez AM, Ciftci M, Beydemir S, Ozdemir H, Budak H, Gulcin I, Comakli V, Emircupani T, Ekinci D, Kuzu M, Jiang Q, Eichele G, Kufrevioglu OI. "An analysis of expression patterns of genes encoding proteins with catalytic activities." <i>BMC Genomics</i> 2007,8(1):232                                                                                                                                                                                                                                                               |
| T6124  | NM_007386    | Aco1          | NP                                        |                                                                                                                                                                                                                                                                                                                                                                                                                                                                                                                                                        |
| T10017 | NM_028115    | Trub1         | NP                                        |                                                                                                                                                                                                                                                                                                                                                                                                                                                                                                                                                        |
| T36425 | NM_010834    | Gdf8          | CONCORDANCE                               | McPherron AC, Lawler AM, Lee SJ. "Regulation of skeletal muscle mass in mice by a new TGF-beta superfamily member." <i>Nature</i> 1997 May 1,387(6628):83-90                                                                                                                                                                                                                                                                                                                                                                                           |
| T2452  | NM_009605    | Adipoq        | NP                                        |                                                                                                                                                                                                                                                                                                                                                                                                                                                                                                                                                        |
| T36831 | NM_172585    | Larp5         | NP                                        |                                                                                                                                                                                                                                                                                                                                                                                                                                                                                                                                                        |
| T38370 | XM_137117    | Adamts14      | NP                                        |                                                                                                                                                                                                                                                                                                                                                                                                                                                                                                                                                        |
| T40448 | AK078202     | 6430502G17Rik | NP                                        |                                                                                                                                                                                                                                                                                                                                                                                                                                                                                                                                                        |
| T40349 | BC027793     | Scfd1         | NP                                        |                                                                                                                                                                                                                                                                                                                                                                                                                                                                                                                                                        |
| T39628 | XM_001004492 | LOC677542     | NP                                        |                                                                                                                                                                                                                                                                                                                                                                                                                                                                                                                                                        |
| T45652 | XM_001003389 | LOC676704     | NP                                        |                                                                                                                                                                                                                                                                                                                                                                                                                                                                                                                                                        |
| T1554  | NM_026186    | 1300013D05Rik | NP                                        |                                                                                                                                                                                                                                                                                                                                                                                                                                                                                                                                                        |
| T2218  | NM_031998    | Tsqa14        | NP                                        |                                                                                                                                                                                                                                                                                                                                                                                                                                                                                                                                                        |
| T947   | NM_020036    | Calm4         | NP                                        |                                                                                                                                                                                                                                                                                                                                                                                                                                                                                                                                                        |
| T417   | NM_010118    | Egr2          | NO CONCORDANCE                            | Couplier F, Le Crom S, Maro GS, Manent J, Giovannini M, Maciorowski Z, Fischer A, Gessler M, Charnay P, Topilko P. "Novel features of boundary cap cells revealed by the analysis of newly identified molecular markers." <i>Glia</i> 2009 Oct,57(13):1450-7<br>Wilkinson DG, Bhatt S, Chavrier P, Bravo R, Charnay P. "Segment-specific expression of a zinc-finger gene in the developing nervous system of the mouse." <i>Nature</i> 1989 Feb 2,337(6206):4                                                                                         |
| T4450  | NM_146063    | BC031593      | NP                                        |                                                                                                                                                                                                                                                                                                                                                                                                                                                                                                                                                        |
| T2531  | NM_007394    | Acvr1         | PARTIAL CONCORDANCE                       | Dudas M, Nagy A, Laping NJ, Moustakas A, Kaartinen V. "Tgf-beta3-induced palatal fusion is mediated by Alk-5/Smad pathway." <i>Dev Biol</i> 2004 Feb 1,266(1):96-108<br>Minina E, Schneider S, Rosowski M, Lauster R, Vortkamp A. "Expression of Fgf and Tgfbeta signaling related genes during embryonic endochondral ossification." <i>Gene Expr Patterns</i> 2005 Dec,6(1):102-109<br>Vesper AH, Raetzman LT, Camper SA. "Role of prophet of Pit1 (PROP1) in gonadotrope differentiation and puberty." <i>Endocrinology</i> 2006 Apr,147(4):1654-63 |
| T3020  | NM_025296    | Wdr39         | NP                                        |                                                                                                                                                                                                                                                                                                                                                                                                                                                                                                                                                        |
| T3331  | NM_028712    | Rap2b         | NP                                        |                                                                                                                                                                                                                                                                                                                                                                                                                                                                                                                                                        |
| T3349  | NM_009374    | Tgm3          | CONCORDANCE                               | Zhang J, Zhi HY, Ding F, Luo AP, Liu ZH. "Transglutaminase 3 expression in C57Bl/6j mouse embryo epidermis and the correlation with its differentiation." <i>Cell Res</i> 2005 Feb,15(2):105-10                                                                                                                                                                                                                                                                                                                                                        |
| T1585  | NM_029291    | Ascc2         | NP                                        |                                                                                                                                                                                                                                                                                                                                                                                                                                                                                                                                                        |
| T6367  | NM_007927    | Emd           | NP                                        |                                                                                                                                                                                                                                                                                                                                                                                                                                                                                                                                                        |
| T6712  | NM_146097    | Cbwd1         | NP                                        |                                                                                                                                                                                                                                                                                                                                                                                                                                                                                                                                                        |
| T8259  | NM_180588    | 2700029E10Rik | NP                                        |                                                                                                                                                                                                                                                                                                                                                                                                                                                                                                                                                        |
| T5156  | NM_172845    | Adamts4       | NP                                        |                                                                                                                                                                                                                                                                                                                                                                                                                                                                                                                                                        |
| T7619  | NM_029810    | Nt5c2         | NP                                        |                                                                                                                                                                                                                                                                                                                                                                                                                                                                                                                                                        |
| T50010 | NM_010456    | Hoxa9         | NP                                        |                                                                                                                                                                                                                                                                                                                                                                                                                                                                                                                                                        |
| T50016 | AB038697     | Olig2         | NO CONCORDANCE                            | Shibasaki K, Takebayashi H, Ikenaka K, Feng L, Gan L. "Expression of the basic helix-loop-factor Olig2 in the developing retina: Olig2 as a new marker for retinal progenitors and late-born cells." <i>Gene Expr Patterns</i> 2007 Jan,7(1-2):57-65                                                                                                                                                                                                                                                                                                   |
| T373   | NM_021450    | Trpm7         | NP                                        |                                                                                                                                                                                                                                                                                                                                                                                                                                                                                                                                                        |
| T35716 | XM_001000101 | Tnks2         | NP                                        |                                                                                                                                                                                                                                                                                                                                                                                                                                                                                                                                                        |
| T37586 | XM_893176    | Znrf3         | NP                                        |                                                                                                                                                                                                                                                                                                                                                                                                                                                                                                                                                        |
| T37334 | NM_001033397 | Krt26         | NP                                        |                                                                                                                                                                                                                                                                                                                                                                                                                                                                                                                                                        |
| T36617 | NM_016693    | Map3k6        | NP                                        |                                                                                                                                                                                                                                                                                                                                                                                                                                                                                                                                                        |
| T36993 | NM_022886    | Scel          | NP                                        |                                                                                                                                                                                                                                                                                                                                                                                                                                                                                                                                                        |
| T30441 | NM_178381    | Trp53i5       | CONCORDANCE                               | Rock JR, Harfe BD. "Expression of TMEM16 paralogs during murine embryogenesis." <i>Dev Dyn</i> 2008 Sep,237(9):2566-74                                                                                                                                                                                                                                                                                                                                                                                                                                 |
| T38055 | NM_205820    | Tlr13         | NP                                        |                                                                                                                                                                                                                                                                                                                                                                                                                                                                                                                                                        |
| T31298 | NM_025911    | Ccdc91        | NP                                        |                                                                                                                                                                                                                                                                                                                                                                                                                                                                                                                                                        |
| T31349 | NM_029012    | Spp13         | NP                                        |                                                                                                                                                                                                                                                                                                                                                                                                                                                                                                                                                        |
| T31544 | NM_025408    | Phca          | NP                                        |                                                                                                                                                                                                                                                                                                                                                                                                                                                                                                                                                        |
| T38469 | NM_001003911 | Adamts7       | NP                                        |                                                                                                                                                                                                                                                                                                                                                                                                                                                                                                                                                        |
| T38458 | XM_980092    | Krt28         | NP                                        |                                                                                                                                                                                                                                                                                                                                                                                                                                                                                                                                                        |
| T38473 | NM_213728    | Krt72         | NP                                        |                                                                                                                                                                                                                                                                                                                                                                                                                                                                                                                                                        |
| T39062 | NM_011310    | S100a3        | NP                                        |                                                                                                                                                                                                                                                                                                                                                                                                                                                                                                                                                        |
| T861   | NM_013640    | Psmb10        | NP                                        |                                                                                                                                                                                                                                                                                                                                                                                                                                                                                                                                                        |
| T99    | NM_025626    | 3110001A13Rik | NP                                        |                                                                                                                                                                                                                                                                                                                                                                                                                                                                                                                                                        |
| T4485  | NM_026362    | 5033414D02Rik | NP                                        |                                                                                                                                                                                                                                                                                                                                                                                                                                                                                                                                                        |
| T4494  | NM_013796    | Naapa         | NP                                        |                                                                                                                                                                                                                                                                                                                                                                                                                                                                                                                                                        |

|        |              |               |                     |                                                                                                                                                                                                                                                                                                    |
|--------|--------------|---------------|---------------------|----------------------------------------------------------------------------------------------------------------------------------------------------------------------------------------------------------------------------------------------------------------------------------------------------|
| T4542  | NM_145139    | Eif3s6ip      | NP                  |                                                                                                                                                                                                                                                                                                    |
| T5657  | NM_178698    | Pigv          | NP                  |                                                                                                                                                                                                                                                                                                    |
| T3123  | NM_028126    | 2610019A05Rik | NP                  |                                                                                                                                                                                                                                                                                                    |
| T2708  | NM_027185    | Def6          | NP                  |                                                                                                                                                                                                                                                                                                    |
| T2726  | NM_023260    | Mrps34        | NP                  |                                                                                                                                                                                                                                                                                                    |
| T4411  | NM_010545    | Ii            | NP                  |                                                                                                                                                                                                                                                                                                    |
| T2550  | NM_011530    | Tap2          | NP                  |                                                                                                                                                                                                                                                                                                    |
| T4559  | NM_009387    | Tk1           | NO CONCORDANCE      | Sansom SN, Griffiths DS, Faedo A, Kleinjan DJ, Ruan Y, Smith J, van Heyningen V, Rubenstein JL, Livesey FJ. "The level of the transcription factor Pax6 is essential for controlling the balance between neural stem cell self-renewal and neurogenesis." <i>PLoS Genet</i> 2009 Jun,5(6):e1000511 |
| T1147  | NM_009812    | Casp8         | NP                  |                                                                                                                                                                                                                                                                                                    |
| T4593  | NM_146011    | Arhqap9       | NP                  |                                                                                                                                                                                                                                                                                                    |
| T4621  | NM_023372    | Rpl38         | NP                  |                                                                                                                                                                                                                                                                                                    |
| T5480  | NM_025624    | 2510048006Rik | NO CONCORDANCE      | Sansom SN, Griffiths DS, Faedo A, Kleinjan DJ, Ruan Y, Smith J, van Heyningen V, Rubenstein JL, Livesey FJ. "The level of the transcription factor Pax6 is essential for controlling the balance between neural stem cell self-renewal and neurogenesis." <i>PLoS Genet</i> 2009 Jun,5(6):e1000511 |
| T4631  | NM_027139    | Taf9          | NO CONCORDANCE      | Sansom SN, Griffiths DS, Faedo A, Kleinjan DJ, Ruan Y, Smith J, van Heyningen V, Rubenstein JL, Livesey FJ. "The level of the transcription factor Pax6 is essential for controlling the balance between neural stem cell self-renewal and neurogenesis." <i>PLoS Genet</i> 2009 Jun,5(6):e1000511 |
| T5489  | NM_025907    | 1600013P15Rik | NP                  |                                                                                                                                                                                                                                                                                                    |
| T5499  | NM_025582    | 2810405K02Rik | NP                  |                                                                                                                                                                                                                                                                                                    |
| T5515  | NM_030711    | Arts1         | NP                  |                                                                                                                                                                                                                                                                                                    |
| T5538  | NM_198031    | Tubgcp3       | NP                  |                                                                                                                                                                                                                                                                                                    |
| T3407  | NM_010220    | Fkbp5         | NP                  |                                                                                                                                                                                                                                                                                                    |
| T1867  | NM_010370    | Gzma          | NP                  |                                                                                                                                                                                                                                                                                                    |
| T5124  | NM_146205    | Armc5         | NP                  |                                                                                                                                                                                                                                                                                                    |
| T5126  | NM_153795    | BC032204      | NP                  |                                                                                                                                                                                                                                                                                                    |
| T2086  | NM_172468    | 4732481H14Rik | NP                  |                                                                                                                                                                                                                                                                                                    |
| T5288  | NM_053180    | Ccrk          | NP                  |                                                                                                                                                                                                                                                                                                    |
| T5298  | NM_009761    | Bnip3l        | NO CONCORDANCE      | Sansom SN, Griffiths DS, Faedo A, Kleinjan DJ, Ruan Y, Smith J, van Heyningen V, Rubenstein JL, Livesey FJ. "The level of the transcription factor Pax6 is essential for controlling the balance between neural stem cell self-renewal and neurogenesis." <i>PLoS Genet</i> 2009 Jun,5(6):e1000511 |
| T2148  | NM_153788    | Centb1        | NP                  |                                                                                                                                                                                                                                                                                                    |
| T4840  | NM_199016    | Enpp4         | NP                  |                                                                                                                                                                                                                                                                                                    |
| T4679  | NM_026829    | Mthfs         | NP                  |                                                                                                                                                                                                                                                                                                    |
| T5383  | NM_016684    | Zfp96         | NP                  |                                                                                                                                                                                                                                                                                                    |
| T5916  | NM_134154    | AW491445      | NP                  |                                                                                                                                                                                                                                                                                                    |
| T6732  | NM_010378    | H2-Aa         | NP                  |                                                                                                                                                                                                                                                                                                    |
| T6710  | NM_026070    | 2900091E11Rik | NP                  |                                                                                                                                                                                                                                                                                                    |
| T6701  | NM_010696    | Lcp2          | NP                  |                                                                                                                                                                                                                                                                                                    |
| T5700  | NM_007497    | Atf1          | NP                  |                                                                                                                                                                                                                                                                                                    |
| T7039  | NM_175397    | 5830484A20Rik | NP                  |                                                                                                                                                                                                                                                                                                    |
| T7306  | NM_013566    | Itab7         | NP                  |                                                                                                                                                                                                                                                                                                    |
| T6175  | NM_024253    | Nkg7          | NP                  |                                                                                                                                                                                                                                                                                                    |
| T6132  | NM_009151    | Selpl         | NP                  |                                                                                                                                                                                                                                                                                                    |
| T6119  | NM_008279    | Map4k1        | NP                  |                                                                                                                                                                                                                                                                                                    |
| T6395  | NM_022024    | Gmfq          | NP                  |                                                                                                                                                                                                                                                                                                    |
| T6429  | NM_009277    | Trim21        | NP                  |                                                                                                                                                                                                                                                                                                    |
| T5756  | NM_010379    | H2-Ab1        | NP                  |                                                                                                                                                                                                                                                                                                    |
| T6500  | NM_021327    | Tnfr1         | NP                  |                                                                                                                                                                                                                                                                                                    |
| T8062  | NM_172435    | P2ry10        | NP                  |                                                                                                                                                                                                                                                                                                    |
| T8264  | NM_013487    | Cd3d          | NP                  |                                                                                                                                                                                                                                                                                                    |
| T9559  | NM_033606    | Dqx1          | NP                  |                                                                                                                                                                                                                                                                                                    |
| T9583  | NM_011053    | Pdcd11        | NP                  |                                                                                                                                                                                                                                                                                                    |
| T6541  | NM_010386    | H2-DMa        | NP                  |                                                                                                                                                                                                                                                                                                    |
| T6570  | NM_008225    | Hcls1         | NP                  |                                                                                                                                                                                                                                                                                                    |
| T6555  | NM_010877    | Ncf2          | NP                  |                                                                                                                                                                                                                                                                                                    |
| T533   | NM_026192    | Calcoco1      | NP                  |                                                                                                                                                                                                                                                                                                    |
| T6567  | NM_145559    | Slc2a9        | NP                  |                                                                                                                                                                                                                                                                                                    |
| T35102 | NM_175105    | Aqp11         | NP                  |                                                                                                                                                                                                                                                                                                    |
| T35018 | NM_178650    | Tbc1d10c      | NP                  |                                                                                                                                                                                                                                                                                                    |
| T35758 | NM_030732    | Tbl1xr1       | NP                  |                                                                                                                                                                                                                                                                                                    |
| T6711  | NM_008152    | Gpr65         | NP                  |                                                                                                                                                                                                                                                                                                    |
| T7349  | NM_010693    | Lck           | NP                  |                                                                                                                                                                                                                                                                                                    |
| T9917  | NM_207246    | Rasgrp3       | NP                  |                                                                                                                                                                                                                                                                                                    |
| T7093  | NM_008368    | Il2rb         | NP                  |                                                                                                                                                                                                                                                                                                    |
| T9918  | NM_001004184 | MGC74379      | NP                  |                                                                                                                                                                                                                                                                                                    |
| T3025  | NM_011190    | Psme2         | NP                  |                                                                                                                                                                                                                                                                                                    |
| T2028  | NM_183264    | 5830405N20Rik | NP                  |                                                                                                                                                                                                                                                                                                    |
| T35133 | NM_007720    | Ccr8          | NP                  |                                                                                                                                                                                                                                                                                                    |
| T35190 | NM_019925    | Gpr132        | NP                  |                                                                                                                                                                                                                                                                                                    |
| T35655 | NM_028657    | F630110N24Rik | NP                  |                                                                                                                                                                                                                                                                                                    |
| T36240 | NM_173028    | Vps13a        | NP                  |                                                                                                                                                                                                                                                                                                    |
| T2801  | NM_007651    | Cd53          | NP                  |                                                                                                                                                                                                                                                                                                    |
| T2820  | NM_134116    | Gpsm3         | NP                  |                                                                                                                                                                                                                                                                                                    |
| T2888  | NM_023137    | Ubd           | NP                  |                                                                                                                                                                                                                                                                                                    |
| T2937  | NM_016933    | Ptprcap       | NP                  |                                                                                                                                                                                                                                                                                                    |
| T36133 | NM_007648    | Cd3e          | CONCORDANCE         | Hetzer-Egger C, Schorpp M, Haas-Assenbaum A, Balling R, Peters H, Boehm T. "Thymopoiesis requires Pax9 function in thymic epithelial cells." <i>Eur J Immunol</i> 2002 Apr,32(4):1175-81                                                                                                           |
| T1223  | NM_028058    | Fundc1        | NP                  |                                                                                                                                                                                                                                                                                                    |
| T1211  | NM_009533    | Xrcc5         | NP                  |                                                                                                                                                                                                                                                                                                    |
| T3455  | NM_018729    | Cd244         | NP                  |                                                                                                                                                                                                                                                                                                    |
| T2454  | NM_013542    | Gzmb          | NP                  |                                                                                                                                                                                                                                                                                                    |
| T2424  | NM_172900    | Siglec10      | NP                  |                                                                                                                                                                                                                                                                                                    |
| T35818 | XM_905818    | A430107D22Rik | NP                  |                                                                                                                                                                                                                                                                                                    |
| T37003 | NM_017461    | Sept1         | NP                  |                                                                                                                                                                                                                                                                                                    |
| T36899 | NM_011159    | Prkdc         | NP                  |                                                                                                                                                                                                                                                                                                    |
| T36907 | NM_013585    | Psmb9         | NP                  |                                                                                                                                                                                                                                                                                                    |
| T36908 | NM_025959    | Psmc6         | NP                  |                                                                                                                                                                                                                                                                                                    |
| T36215 | NM_009985    | Ctsw          | NP                  |                                                                                                                                                                                                                                                                                                    |
| T36527 | NM_008400    | Itgal         | NP                  |                                                                                                                                                                                                                                                                                                    |
| T36949 | NM_018750    | Rassf5        | NP                  |                                                                                                                                                                                                                                                                                                    |
| T31100 | NM_021274    | Cxcl10        | PARTIAL CONCORDANCE | Visel A, Thaller C, Eichele G. "GenePaint.org: an atlas of gene expression patterns in the mouse embryo." <i>Nucleic Acids Res</i> 2004 Jan 1,32(Database issue):D552-6                                                                                                                            |
| T31131 | NM_133978    | Cmtm7         | NP                  |                                                                                                                                                                                                                                                                                                    |
| T31140 | NM_011854    | Oasl2         | NP                  |                                                                                                                                                                                                                                                                                                    |
| T30531 | NM_027222    | 2010001M09Rik | NP                  |                                                                                                                                                                                                                                                                                                    |
| T30282 | NM_019583    | Il17rb        | NP                  |                                                                                                                                                                                                                                                                                                    |
| T30799 | NM_145545    | Gbp6          | NP                  |                                                                                                                                                                                                                                                                                                    |
| T31172 | NM_007763    | Crip1         | NP                  |                                                                                                                                                                                                                                                                                                    |
| T31200 | NM_009895    | Cish          | NP                  |                                                                                                                                                                                                                                                                                                    |
| T31211 | NM_030253    | Parp9         | CONCORDANCE         | Hakme A, Huber A, Dolle P, Schreiber V. "The macroPARP genes Parp-9 and Parp-14 are developmentally and differentially regulated in mouse tissues." <i>Dev Dyn</i> 2008 Jan,237(1):209-15                                                                                                          |
| T38318 | NM_025846    | Rras2         | NP                  |                                                                                                                                                                                                                                                                                                    |
| T38314 | NM_025396    | Pgls          | NP                  |                                                                                                                                                                                                                                                                                                    |
| T31243 | NM_007783    | Csk           | NP                  |                                                                                                                                                                                                                                                                                                    |
| T36293 | XM_908064    | Dnaic13       | NP                  |                                                                                                                                                                                                                                                                                                    |

|        |              |               |                     |                                                                                                                                                                                                                                                                                                                                                                                                                                                             |
|--------|--------------|---------------|---------------------|-------------------------------------------------------------------------------------------------------------------------------------------------------------------------------------------------------------------------------------------------------------------------------------------------------------------------------------------------------------------------------------------------------------------------------------------------------------|
| T36570 | NM_013707    | Krtap14       | NP                  |                                                                                                                                                                                                                                                                                                                                                                                                                                                             |
| T36604 | NM_013825    | Ly75          | NP                  |                                                                                                                                                                                                                                                                                                                                                                                                                                                             |
| T9961  | NM_008527    | Klr1c         | NP                  |                                                                                                                                                                                                                                                                                                                                                                                                                                                             |
| T37770 | NM_183390    | Klhl6         | NP                  |                                                                                                                                                                                                                                                                                                                                                                                                                                                             |
| T30348 | XM_486159    | 2310066E14Rik | NP                  |                                                                                                                                                                                                                                                                                                                                                                                                                                                             |
| T36501 | NM_008359    | Il17ra        | NP                  |                                                                                                                                                                                                                                                                                                                                                                                                                                                             |
| T36123 | NM_009138    | Ccl25         | NP                  |                                                                                                                                                                                                                                                                                                                                                                                                                                                             |
| T37006 | NM_008458    | Serpina3c     | NP                  |                                                                                                                                                                                                                                                                                                                                                                                                                                                             |
| T37053 | NM_011409    | Slfn3         | PARTIAL CONCORDANCE | Visel A, Thaller C, Eichele G. "GenePaint.org: an atlas of gene expression patterns in the mouse embryo." Nucleic Acids Res 2004 Jan 1,32(Database issue):D552-6                                                                                                                                                                                                                                                                                            |
| T31279 | NM_008365    | Il18r1        | NP                  |                                                                                                                                                                                                                                                                                                                                                                                                                                                             |
| T31285 | NM_019640    | Pitpnb        | NP                  |                                                                                                                                                                                                                                                                                                                                                                                                                                                             |
| T38070 | NM_021053    | Tscot         | NP                  |                                                                                                                                                                                                                                                                                                                                                                                                                                                             |
| T31336 | NM_026218    | Fgfr1op2      | NP                  |                                                                                                                                                                                                                                                                                                                                                                                                                                                             |
| T31435 | NM_023514    | Mrps9         | NP                  |                                                                                                                                                                                                                                                                                                                                                                                                                                                             |
| T31590 | XM_916862    | Nalp6         | NP                  |                                                                                                                                                                                                                                                                                                                                                                                                                                                             |
| T31931 | NM_001038664 | Gngt2         | NP                  |                                                                                                                                                                                                                                                                                                                                                                                                                                                             |
| T38672 | NM_028785    | Dock8         | NP                  |                                                                                                                                                                                                                                                                                                                                                                                                                                                             |
| T39052 | NM_011815    | Fyb           | NP                  |                                                                                                                                                                                                                                                                                                                                                                                                                                                             |
| T39623 | XM_622820    | LOC547338     | NP                  |                                                                                                                                                                                                                                                                                                                                                                                                                                                             |
| T8284  | NM_010161    | Evi2a         | NP                  |                                                                                                                                                                                                                                                                                                                                                                                                                                                             |
| T45280 | NM_175479    | A330008L17Rik | NP                  |                                                                                                                                                                                                                                                                                                                                                                                                                                                             |
| T45003 | AK030875     | AI427122      | NP                  |                                                                                                                                                                                                                                                                                                                                                                                                                                                             |
| T31637 | NM_010724    | Psmb8         | NP                  |                                                                                                                                                                                                                                                                                                                                                                                                                                                             |
| T38286 | NM_007645    | Cd37          | NP                  |                                                                                                                                                                                                                                                                                                                                                                                                                                                             |
| T31443 | NM_016857    | Exoc7         | NP                  |                                                                                                                                                                                                                                                                                                                                                                                                                                                             |
| T63013 | NM_018872    | D1Bwg0491e    | NP                  |                                                                                                                                                                                                                                                                                                                                                                                                                                                             |
| T491   | NM_178911    | Pld4          | NP                  |                                                                                                                                                                                                                                                                                                                                                                                                                                                             |
| T30275 | NM_013591    | Madcam1       | NP                  |                                                                                                                                                                                                                                                                                                                                                                                                                                                             |
| T30080 | NM_009875    | Cdkn1b        | NP                  |                                                                                                                                                                                                                                                                                                                                                                                                                                                             |
| T4745  | NM_177450    | Cndp1         | NP                  |                                                                                                                                                                                                                                                                                                                                                                                                                                                             |
| T4117  | NM_207680    | Bcl2l11       | NP                  |                                                                                                                                                                                                                                                                                                                                                                                                                                                             |
| T1002  | NM_026183    | 1300013115Rik | NP                  |                                                                                                                                                                                                                                                                                                                                                                                                                                                             |
| T995   | NM_008269    | Hoxb6         | PARTIAL CONCORDANCE | Graham A, Maden M, Krumlauf R. The murine Hox-2 genes display dynamic dorsoventral patterns of expression during central nervous system development. Development 1991 May,112(1):255-64 Concordance with picture from Hoffman BG, Zavaglia B, Witzsche J, Ruiz de Algora T, Beach M, Hoodless PA, Jones SJ, Marra MA, Helgason CD. "Identification of transcripts with enriched expression in the developing and adult pancreas." Genome Biol 2008,9(6):R99 |
| T299   | NM_146028    | Stac2         | NP                  |                                                                                                                                                                                                                                                                                                                                                                                                                                                             |
| T6362  | AK166607     | Steap2        | NP                  |                                                                                                                                                                                                                                                                                                                                                                                                                                                             |
| T7563  | NM_133894    | Uqt2b38       | NP                  |                                                                                                                                                                                                                                                                                                                                                                                                                                                             |
| T8699  | NM_013910    | Fbxl10        | NP                  |                                                                                                                                                                                                                                                                                                                                                                                                                                                             |
| T7626  | NM_009327    | Tcf1          | PARTIAL CONCORDANCE | Suh JM, Yu CT, Tang K, Tanaka T, Kodama T, Tsai MJ, Tsai SY, "The expression profiles of nuclear receptors in the developing and adult kidney." Mol Endocrinol 2006 Dec,20(12):3412-20                                                                                                                                                                                                                                                                      |
| T5441  | NM_153535    | BC035537      | NP                  |                                                                                                                                                                                                                                                                                                                                                                                                                                                             |
| T455   | NM_015749    | Tcn2          | NP                  |                                                                                                                                                                                                                                                                                                                                                                                                                                                             |
| T9926  | NM_026085    | 3110049J23Rik | NP                  |                                                                                                                                                                                                                                                                                                                                                                                                                                                             |
| T1358  | NM_021517    | Pdzk1         | NP                  |                                                                                                                                                                                                                                                                                                                                                                                                                                                             |
| T35983 | NM_173427    | Klhdca7a      | NP                  |                                                                                                                                                                                                                                                                                                                                                                                                                                                             |
| T7191  | NM_146071    | Muc20         | NP                  |                                                                                                                                                                                                                                                                                                                                                                                                                                                             |
| T36846 | NM_008982    | Ptprj         | NP                  |                                                                                                                                                                                                                                                                                                                                                                                                                                                             |
| T30840 | NM_008116    | Gqt1          | NP                  |                                                                                                                                                                                                                                                                                                                                                                                                                                                             |
| T30857 | NM_007607    | Car4          | CONCORDANCE         | Cankaya M, Hernandez AM, Ciftci M, Beydemir S, Ozdemir H, Budak H, Gulcin I, Comakli V, Emircupani T, Ekinci D, Kuzu M, Jiang Q, Eichele G, Kufrevioglu OI. "An analysis of expression patterns of genes encoding proteins with catalytic activities." BMC Genomics 2007,8():232                                                                                                                                                                            |
| T37514 | NM_001004150 | A4galt        | NP                  |                                                                                                                                                                                                                                                                                                                                                                                                                                                             |
| T30962 | NM_027857    | Acy3          | NP                  |                                                                                                                                                                                                                                                                                                                                                                                                                                                             |
| T31050 | NM_016785    | Tpmt          | NP                  |                                                                                                                                                                                                                                                                                                                                                                                                                                                             |
| T37659 | XM_284236    | D630042F21Rik | NP                  |                                                                                                                                                                                                                                                                                                                                                                                                                                                             |
| T31548 | NM_178413    | BC051244      | NP                  |                                                                                                                                                                                                                                                                                                                                                                                                                                                             |
| T31646 | NM_133962    | Arhaef18      | NP                  |                                                                                                                                                                                                                                                                                                                                                                                                                                                             |
| T32005 | NM_030021    | D730039F16Rik | NP                  |                                                                                                                                                                                                                                                                                                                                                                                                                                                             |
| T38208 | NM_010018    | Dao1          | NP                  |                                                                                                                                                                                                                                                                                                                                                                                                                                                             |
| T39640 | XM_001003628 | 1110060D06Rik | NP                  |                                                                                                                                                                                                                                                                                                                                                                                                                                                             |
| T51042 | BC022226     | Slc5a2        | NP                  |                                                                                                                                                                                                                                                                                                                                                                                                                                                             |
| T51027 | NM_183354    | Slc12a1       | NP                  |                                                                                                                                                                                                                                                                                                                                                                                                                                                             |
| T3986  | NM_018802    | Syt8          | NP                  |                                                                                                                                                                                                                                                                                                                                                                                                                                                             |
| T5860  | NM_027320    | Ifi35         | NP                  |                                                                                                                                                                                                                                                                                                                                                                                                                                                             |
| T5995  | NM_009357    | Tex261        | NP                  |                                                                                                                                                                                                                                                                                                                                                                                                                                                             |
| T6691  | NM_029763    | Polr3f        | NP                  |                                                                                                                                                                                                                                                                                                                                                                                                                                                             |
| T6628  | NM_027838    | Senp8         | NP                  |                                                                                                                                                                                                                                                                                                                                                                                                                                                             |
| T6854  | NM_170591    | Nupl1         | NP                  |                                                                                                                                                                                                                                                                                                                                                                                                                                                             |
| T7684  | NM_025274    | Dppa5         | NP                  |                                                                                                                                                                                                                                                                                                                                                                                                                                                             |
| T4919  | NM_018869    | Gprk5         | NP                  |                                                                                                                                                                                                                                                                                                                                                                                                                                                             |
| T2609  | NM_011901    | Taf7          | NP                  |                                                                                                                                                                                                                                                                                                                                                                                                                                                             |
| T484   | NM_008508    | Lor           | NP                  |                                                                                                                                                                                                                                                                                                                                                                                                                                                             |
| T8093  | NM_009337    | Tcl1          | NP                  |                                                                                                                                                                                                                                                                                                                                                                                                                                                             |
| T36303 | NM_139218    | Dppa3         | NP                  |                                                                                                                                                                                                                                                                                                                                                                                                                                                             |
| T233   | NM_145546    | Gtf2b         | NP                  |                                                                                                                                                                                                                                                                                                                                                                                                                                                             |
| T3460  | NM_011328    | Sct           | NO CONCORDANCE      | Siu FK, Sham MH, Chow BK. "Secretin, a known gastrointestinal peptide, is widely expressed during mouse embryonic development." Gene Expr Patterns 2005                                                                                                                                                                                                                                                                                                     |
| T2492  | NM_030564    | Rnf34         | NP                  |                                                                                                                                                                                                                                                                                                                                                                                                                                                             |
| T37312 | NM_028034    | 2410004F06Rik | NP                  |                                                                                                                                                                                                                                                                                                                                                                                                                                                             |
| T31260 | NM_146198    | Slc5a11       | NP                  |                                                                                                                                                                                                                                                                                                                                                                                                                                                             |
| T37647 | XM_125673    | Cxhc6         | NP                  |                                                                                                                                                                                                                                                                                                                                                                                                                                                             |
| T31584 | NM_001010826 | Kctd14        | NP                  |                                                                                                                                                                                                                                                                                                                                                                                                                                                             |
| T39844 | BC059932     | 2410025L10Rik | NP                  |                                                                                                                                                                                                                                                                                                                                                                                                                                                             |
| T63197 | NM_145833    | Lin28         | NP                  |                                                                                                                                                                                                                                                                                                                                                                                                                                                             |
| T39525 | AK145040     | Gtf3c3        | NP                  |                                                                                                                                                                                                                                                                                                                                                                                                                                                             |
| T39854 | NM_001042503 | Trim71        | NP                  |                                                                                                                                                                                                                                                                                                                                                                                                                                                             |
| T70394 | MIMAT0000538 | mmu-miR-31    | NP:microRNA         |                                                                                                                                                                                                                                                                                                                                                                                                                                                             |
| T35928 | NM_007445    | Amh           | CONCORDANCE         | Jamin SP, Arango NA, Mishina Y, Hanks MC, Behringer RR. "Requirement of Bmpr1a for Mullerian duct regression during male sexual development." Nat Genet 2002 Nov,32(3):408-10                                                                                                                                                                                                                                                                               |
| T9706  | NM_026489    | Hormad1       | NP                  |                                                                                                                                                                                                                                                                                                                                                                                                                                                             |
| T36277 | NM_010029    | Ddx4          | NP                  |                                                                                                                                                                                                                                                                                                                                                                                                                                                             |
| T40010 | XR_002340    | 6330411D24Rik | NP                  |                                                                                                                                                                                                                                                                                                                                                                                                                                                             |
| T4760  | NM_024412    | Clnka         | NP                  |                                                                                                                                                                                                                                                                                                                                                                                                                                                             |
| T36726 | NM_139310    | Otoa          | NP                  |                                                                                                                                                                                                                                                                                                                                                                                                                                                             |
| T37121 | NM_009347    | Tecta         | CONCORDANCE         | Rau A, Legan PK, Richardson GP. "Tectorin mRNA expression is spatially and temporally restricted during mouse inner ear development." J Comp Neurol 1999 Mar 8,405(2):271-80                                                                                                                                                                                                                                                                                |
| T37122 | NM_009350    | Tenr          | NP                  |                                                                                                                                                                                                                                                                                                                                                                                                                                                             |
| T37639 | XM_908254    | Cldn22        | NP                  |                                                                                                                                                                                                                                                                                                                                                                                                                                                             |



|        |              |                |                     |                                                                                                                                                                                                                                                                                                                                                                                                                                                |
|--------|--------------|----------------|---------------------|------------------------------------------------------------------------------------------------------------------------------------------------------------------------------------------------------------------------------------------------------------------------------------------------------------------------------------------------------------------------------------------------------------------------------------------------|
| T30400 | NM_010953    | Oc90           | CONCORDANCE         | Li S, Mark S, Radde-Gallwitz K, Schlisner R, Chin MT, Chen P. "Hey2 functions in parallel with Hes1 and Hes5 for mammalian auditory sensory organ development." BMC Dev Biol 2008,8(1):20                                                                                                                                                                                                                                                      |
| T38650 | NM_001018019 | AY616753       | NP                  |                                                                                                                                                                                                                                                                                                                                                                                                                                                |
| T40039 | XM_992778    | EG624918       | NP                  |                                                                                                                                                                                                                                                                                                                                                                                                                                                |
| T45144 | NM_013624    | Otoq           | NP                  |                                                                                                                                                                                                                                                                                                                                                                                                                                                |
| T31019 | NM_027172    | 2310046K01Rik  | NP                  |                                                                                                                                                                                                                                                                                                                                                                                                                                                |
| T37802 | NM_001009574 | Taar5          | NP                  |                                                                                                                                                                                                                                                                                                                                                                                                                                                |
| T37815 | NM_001033292 | Espnl          | NP                  |                                                                                                                                                                                                                                                                                                                                                                                                                                                |
| T1692  | NM_153158    | E130308A19Rik  | NP                  |                                                                                                                                                                                                                                                                                                                                                                                                                                                |
| T9121  | NM_007774    | Cryga          | CONCORDANCE         | Santhiya ST, Abd-alla SM, Loster J, Graw J. "Reduced levels of gamma-crystallin transcripts during embryonic development of murine Cat2nop mutant lenses." Graefes Arch Clin Exp Ophthalmol 1995 Dec,233(12):795-800                                                                                                                                                                                                                           |
| T1845  | NM_009965    | Cryba1         | NP                  |                                                                                                                                                                                                                                                                                                                                                                                                                                                |
| T35173 | NM_016975    | Gja3           | NP                  |                                                                                                                                                                                                                                                                                                                                                                                                                                                |
| T35175 | NM_008123    | Gja8           | NP                  |                                                                                                                                                                                                                                                                                                                                                                                                                                                |
| T30651 | NM_009751    | Bfsp1          | NP                  |                                                                                                                                                                                                                                                                                                                                                                                                                                                |
| T37225 | NM_178679    | Zfp365         | NP                  |                                                                                                                                                                                                                                                                                                                                                                                                                                                |
| T39036 | NM_011939    | Hsf4           | NP                  |                                                                                                                                                                                                                                                                                                                                                                                                                                                |
| T36200 | NM_007773    | Crybb2         | NP                  |                                                                                                                                                                                                                                                                                                                                                                                                                                                |
| T36517 | XM_909063    | Ipo8           | NP                  |                                                                                                                                                                                                                                                                                                                                                                                                                                                |
| T37688 | XR_005138    | E130119H09Rik  | NP                  |                                                                                                                                                                                                                                                                                                                                                                                                                                                |
| T36110 | NM_007601    | Capn3          | CONCORDANCE         | Herasse M, Ono Y, Fougerousse F, Kimura E, Stockholm D, Beley C, Montarras D, Pinset C, Sorimachi H, Suzuki K, Beckmann JS, Richard I. "Expression and functional characteristics of calpain 3 isoforms generated through tissue-specific transcriptional and posttranscriptional events." Mol Cell Biol 1999 Jun,19(6):4047-55                                                                                                                |
| T37644 | NM_153076    | Crygn          | NP                  |                                                                                                                                                                                                                                                                                                                                                                                                                                                |
| T30396 | NM_019689    | Arid3b         | NP                  |                                                                                                                                                                                                                                                                                                                                                                                                                                                |
| T32146 | NM_172872    | Ankrd38        | NP                  |                                                                                                                                                                                                                                                                                                                                                                                                                                                |
| T40285 | NM_028736    | Grip1          | NP                  |                                                                                                                                                                                                                                                                                                                                                                                                                                                |
| T39505 | AK043703     | A830021M18     | NP                  |                                                                                                                                                                                                                                                                                                                                                                                                                                                |
| T39438 | XM_112126    | Nhs            | PARTIAL CONCORDANCE | Burdon KP, McKay JD, Sale MM, Russell-Eggitt IM, Mackey DA, Wirth MG, Elder JE, Nicoll A, Clarke MP, FitzGerald LM, Stankovich JM, Shaw MA, Sharma S, Gajovic S, Gruss P, Ross S, Thomas P, Voss AK, Thomas T, Gez J, Craig JE. "Mutations in a novel gene, NHS, cause the pleiotropic effects of Nance-Horan syndrome, including severe congenital cataract, dental anomalies, and mental retardation." Am J Hum Genet 2003 Nov,73(5):1120-30 |
| T45578 | NM_028029    | Dnmbp          | NP                  |                                                                                                                                                                                                                                                                                                                                                                                                                                                |
| T818   | NM_176963    | Galm           | NP                  |                                                                                                                                                                                                                                                                                                                                                                                                                                                |
| T410   | NM_134017    | Mat2b          | NP                  |                                                                                                                                                                                                                                                                                                                                                                                                                                                |
| T910   | NM_007954    | Es1            | NP                  |                                                                                                                                                                                                                                                                                                                                                                                                                                                |
| T4777  | NM_009997    | Cyp2a4         | NP                  |                                                                                                                                                                                                                                                                                                                                                                                                                                                |
| T4445  | NM_008971    | Ptk9           | NP                  |                                                                                                                                                                                                                                                                                                                                                                                                                                                |
| T4562  | NM_201234    | D630030L16Rik  | NP                  |                                                                                                                                                                                                                                                                                                                                                                                                                                                |
| T5330  | NM_147091    | Olfir568       | NP                  |                                                                                                                                                                                                                                                                                                                                                                                                                                                |
| T5328  | NM_146822    | Olfir640       | NP                  |                                                                                                                                                                                                                                                                                                                                                                                                                                                |
| T5333  | NM_147072    | Olfir641       | NP                  |                                                                                                                                                                                                                                                                                                                                                                                                                                                |
| T5353  | XM_358344    | Cep2           | NP                  |                                                                                                                                                                                                                                                                                                                                                                                                                                                |
| T5260  | NM_146177    | Suv420h2       | NP                  |                                                                                                                                                                                                                                                                                                                                                                                                                                                |
| T2137  | NM_024244    | 1200015N20Rik  | NP                  |                                                                                                                                                                                                                                                                                                                                                                                                                                                |
| T163   | NM_133699    | Atp6v1c2       | NP                  |                                                                                                                                                                                                                                                                                                                                                                                                                                                |
| T5331  | NM_001011536 | Olfir566       | NP                  |                                                                                                                                                                                                                                                                                                                                                                                                                                                |
| T5322  | NM_147088    | Olfir569       | NP                  |                                                                                                                                                                                                                                                                                                                                                                                                                                                |
| T5314  | NM_147085    | Olfir571       | NP                  |                                                                                                                                                                                                                                                                                                                                                                                                                                                |
| T5317  | NM_147115    | Olfir578       | NP                  |                                                                                                                                                                                                                                                                                                                                                                                                                                                |
| T5319  | NM_147052    | Olfir589       | NP                  |                                                                                                                                                                                                                                                                                                                                                                                                                                                |
| T5321  | NM_013621    | Olfir69        | NP                  |                                                                                                                                                                                                                                                                                                                                                                                                                                                |
| T1094  | NM_008867    | Pla2g1br       | NP                  |                                                                                                                                                                                                                                                                                                                                                                                                                                                |
| T4312  | NM_203509    | NP_TR6JSE50FPA | NP                  |                                                                                                                                                                                                                                                                                                                                                                                                                                                |
| T4182  | NM_144917    | Rbed1          | NP                  |                                                                                                                                                                                                                                                                                                                                                                                                                                                |
| T4357  | NM_198311    | Ttc8           | NP                  |                                                                                                                                                                                                                                                                                                                                                                                                                                                |
| T4186  | NM_173862    | BC030396       | NP                  |                                                                                                                                                                                                                                                                                                                                                                                                                                                |
| T6320  | NM_030074    | Zfp687         | NP                  |                                                                                                                                                                                                                                                                                                                                                                                                                                                |
| T7397  | NM_183161    | BC019537       | NP                  |                                                                                                                                                                                                                                                                                                                                                                                                                                                |
| T5943  | NM_020276    | Nelf           | PARTIAL CONCORDANCE | Kramer PR, Wray S. "Nasal embryonic LHRH factor (NELF) expression within the CNS and PNS of the rodent." Brain Res Gene Expr Patterns 2001 Aug,1(1):23-6                                                                                                                                                                                                                                                                                       |
| T6318  | NM_027548    | Serpib7        | NP                  |                                                                                                                                                                                                                                                                                                                                                                                                                                                |
| T7771  | NM_178414    | BC048390       | NP                  |                                                                                                                                                                                                                                                                                                                                                                                                                                                |
| T6385  | NM_198623    | Ubaln3         | NP                  |                                                                                                                                                                                                                                                                                                                                                                                                                                                |
| T6328  | NM_008299    | Dnaib3         | NP                  |                                                                                                                                                                                                                                                                                                                                                                                                                                                |
| T6981  | NM_172338    | Dnaic16        | NP                  |                                                                                                                                                                                                                                                                                                                                                                                                                                                |
| T7794  | NM_080467    | Atp6v0a4       | NP                  |                                                                                                                                                                                                                                                                                                                                                                                                                                                |
| T7787  | NM_011126    | Plunc          | CONCORDANCE         | LeClair EE, Nguyen L, Bingle L, MacGowan A, Singleton V, Ward SJ, Bingle CD. "Genomic organization of the mouse plunc gene and expression in the developing airways and thymus." Biochem Biophys Res Commun 2001 Jun 15,284(3):792-7                                                                                                                                                                                                           |
| T7824  | NM_028934    | 4930452B06Rik  | NP                  |                                                                                                                                                                                                                                                                                                                                                                                                                                                |
| T7821  | NM_175402    | Rbm15b         | NP                  |                                                                                                                                                                                                                                                                                                                                                                                                                                                |
| T7855  | NM_001008230 | Gm605          | NP                  |                                                                                                                                                                                                                                                                                                                                                                                                                                                |
| T7204  | NM_011183    | Psen2          | NP                  |                                                                                                                                                                                                                                                                                                                                                                                                                                                |
| T6415  | NM_001004066 | Zfp386         | NP                  |                                                                                                                                                                                                                                                                                                                                                                                                                                                |
| T7539  | NM_177406    | MGC25972       | NP                  |                                                                                                                                                                                                                                                                                                                                                                                                                                                |
| T7540  | NM_021372    | Sertad2        | NP                  |                                                                                                                                                                                                                                                                                                                                                                                                                                                |
| T7694  | NM_013809    | Cyp2g1         | NP                  |                                                                                                                                                                                                                                                                                                                                                                                                                                                |
| T7704  | NM_008578    | Mef2b          | NO CONCORDANCE      | Molkentin JD, Firulli AB, Black BL, Martin JF, Hustad CM, Copeland N, Jenkins N, Lyons G, Olson EN. "MEF2B is a potent transactivator expressed in early myogenic lineages." Mol Cell Biol 1996 Jul,16(7):3814-24                                                                                                                                                                                                                              |
| T7712  | NM_018751    | Sult1c1        | NP                  |                                                                                                                                                                                                                                                                                                                                                                                                                                                |
| T8055  | NM_201370    | BC052883       | NP                  |                                                                                                                                                                                                                                                                                                                                                                                                                                                |
| T7591  | NM_007647    | Entpd5         | NP                  |                                                                                                                                                                                                                                                                                                                                                                                                                                                |
| T8722  | NM_027977    | 2310001A20Rik  | NP                  |                                                                                                                                                                                                                                                                                                                                                                                                                                                |
| T8770  | NM_182995    | 6330503K22Rik  | NP                  |                                                                                                                                                                                                                                                                                                                                                                                                                                                |
| T4143  | NM_144536    | Cdkal1         | NP                  |                                                                                                                                                                                                                                                                                                                                                                                                                                                |
| T348   | NM_145355    | Rnf185         | NP                  |                                                                                                                                                                                                                                                                                                                                                                                                                                                |
| T7494  | NM_144820    | 1700009P13Rik  | NP                  |                                                                                                                                                                                                                                                                                                                                                                                                                                                |
| T8482  | NM_029992    | A930031F18Rik  | NP                  |                                                                                                                                                                                                                                                                                                                                                                                                                                                |
| T8814  | NM_009370    | Tgfb1          | NO CONCORDANCE      | Minina E, Schneider S, Rosowski M, Lauster R, Vortkamp A. Expression of Fgf and Tgfbeta signaling related genes during embryonic endochondral ossification., Gene Expr Patterns 2005 Dec,6(1):102-109                                                                                                                                                                                                                                          |
| T35025 | XM_888129    | 2300003P22Rik  | NP                  |                                                                                                                                                                                                                                                                                                                                                                                                                                                |
| T35057 | XM_485677    | 2410131K14Rik  | NP                  |                                                                                                                                                                                                                                                                                                                                                                                                                                                |
| T35016 | NM_027238    | 1810054D07Rik  | NP                  |                                                                                                                                                                                                                                                                                                                                                                                                                                                |
| T35079 | NM_028258    | Dzip1l         | NP                  |                                                                                                                                                                                                                                                                                                                                                                                                                                                |
| T35768 | XM_001005685 | 9130229H14Rik  | NP                  |                                                                                                                                                                                                                                                                                                                                                                                                                                                |
| T35785 | NM_001024619 | Lrrc54         | NP                  |                                                                                                                                                                                                                                                                                                                                                                                                                                                |
| T8171  | NM_023247    | 4733401H18Rik  | NP                  |                                                                                                                                                                                                                                                                                                                                                                                                                                                |
| T8176  | NM_009477    | Upp1           | NP                  |                                                                                                                                                                                                                                                                                                                                                                                                                                                |
| T7916  | NM_028226    | 3000004N20Rik  | NP                  |                                                                                                                                                                                                                                                                                                                                                                                                                                                |
| T9480  | NM_028298    | Zfp655         | NO CONCORDANCE      | Visel A, Thaller C, Eichele G. "GenePaint.org: an atlas of gene expression patterns in the mouse embryo." Nucleic Acids Res 2004 Jan 1,32(Database issue):D552-6                                                                                                                                                                                                                                                                               |

|        |              |               |                        |                                                                                                                                                                                                                                |
|--------|--------------|---------------|------------------------|--------------------------------------------------------------------------------------------------------------------------------------------------------------------------------------------------------------------------------|
| T3960  | NM_145973    | Eil3          | NP                     |                                                                                                                                                                                                                                |
| T35322 | NM_134216    | V1rh7         | NP                     |                                                                                                                                                                                                                                |
| T35935 | NM_023617    | Aox3          | NP                     |                                                                                                                                                                                                                                |
| T3062  | NM_011260    | Req3a         | NP                     |                                                                                                                                                                                                                                |
| T35981 | NM_175516    | Lrrn6c        | NP                     |                                                                                                                                                                                                                                |
| T77    | NM_172891    | Stvk1         | NP                     |                                                                                                                                                                                                                                |
| T387   | NM_144890    | BC018465      | NP                     |                                                                                                                                                                                                                                |
| T7114  | NM_016807    | Sdcbp         | NP                     |                                                                                                                                                                                                                                |
| T7206  | NM_017465    | Sult2b1       | NP                     |                                                                                                                                                                                                                                |
| T35644 | NM_025725    | Ccdc96        | NP                     |                                                                                                                                                                                                                                |
| T35650 | XM_910825    | 4921528H16Rik | NP                     |                                                                                                                                                                                                                                |
| T36192 | NM_007755    | Cpeb1         | NP                     |                                                                                                                                                                                                                                |
| T35476 | NM_181853    | Trim66        | NP                     |                                                                                                                                                                                                                                |
| T35444 | NM_019739    | Foxo1         | PARTIAL<br>CONCORDANCE | Hoekman MF, Jacobs FM, Smidt MP, Burbach JP. "Spatial and temporal expression of FoxO transcription factors in the developing and adult murine brain." Gene Expr Patterns 2006 Jan,6(2):134-40                                 |
| T3496  | NM_023631    | Aox4          | NP                     |                                                                                                                                                                                                                                |
| T36638 | NM_026779    | Mocos         | NP                     |                                                                                                                                                                                                                                |
| T37020 | NM_145838    | St8sia6       | NP                     |                                                                                                                                                                                                                                |
| T30873 | NM_007837    | Ddit3         | NP                     |                                                                                                                                                                                                                                |
| T30926 | NM_145532    | Mall          | NP                     |                                                                                                                                                                                                                                |
| T31110 | NM_023135    | Sult1e1       | NP                     |                                                                                                                                                                                                                                |
| T31771 | NM_134109    | Ildr1         | NP                     |                                                                                                                                                                                                                                |
| T30516 | NM_172205    | Sbsn          | NP                     |                                                                                                                                                                                                                                |
| T30226 | NM_145554    | Ldlrap1       | NP                     |                                                                                                                                                                                                                                |
| T30794 | NM_028634    | Pqea1         | NP                     |                                                                                                                                                                                                                                |
| T31226 | NM_009736    | Baq1          | NP                     |                                                                                                                                                                                                                                |
| T38110 | NM_031391    | Gtf2a1        | NP                     |                                                                                                                                                                                                                                |
| T31239 | BC031933     | Lipl3         | NP                     |                                                                                                                                                                                                                                |
| T38356 | XM_924923    | Fmo6          | NP                     |                                                                                                                                                                                                                                |
| T9396  | NM_026298    | 4930553F24Rik | NP                     |                                                                                                                                                                                                                                |
| T9430  | NM_008448    | Kif5b         | NP                     |                                                                                                                                                                                                                                |
| T36587 | NM_144556    | Lqi4          | NP                     |                                                                                                                                                                                                                                |
| T37399 | XM_133663    | 4931431F19Rik | NP                     |                                                                                                                                                                                                                                |
| T37336 | XM_143418    | Ankrd35       | NP                     |                                                                                                                                                                                                                                |
| T37388 | XM_127142    | 4930573I19Rik | NP                     |                                                                                                                                                                                                                                |
| T37531 | NM_177389    | Mia3          | NP                     |                                                                                                                                                                                                                                |
| T37532 | NM_178778    | A930041I02Rik | NP                     |                                                                                                                                                                                                                                |
| T30379 | BC049156     | Ift74         | NP                     |                                                                                                                                                                                                                                |
| T30323 | NM_009379    | Thpo          | NP                     |                                                                                                                                                                                                                                |
| T31714 | NM_001001182 | Baz2b         | NP                     |                                                                                                                                                                                                                                |
| T4455  | NM_198023    | Rcor1         | PARTIAL<br>CONCORDANCE | Jensen P, Magdaleno S, Lehman KM, Rice DS, Lavallie ER, Collins-Racie L, McCoy JM, Curran T. "A neurogenomics approach to gene expression analysis in the developing brain." Brain Res Mol Brain Res 2004 Dec 20,132(2):116-27 |
| T30681 | NM_178775    | Rps6kc1       | NP                     |                                                                                                                                                                                                                                |
| T37038 | XM_925590    | Slc4a11       | NP                     |                                                                                                                                                                                                                                |
| T35795 | NM_172836    | 9930021J03Rik | NP                     |                                                                                                                                                                                                                                |
| T30419 | XM_908714    | Cnfn          | NP                     |                                                                                                                                                                                                                                |
| T30412 | NM_053184    | Uqt2a1        | NP                     |                                                                                                                                                                                                                                |
| T30420 | NM_001039042 | Klk13         | NP                     |                                                                                                                                                                                                                                |
| T30395 | XM_978169    | Cep63         | NP                     |                                                                                                                                                                                                                                |
| T31250 | NM_175250    | 2810007J24Rik | NP                     |                                                                                                                                                                                                                                |
| T37668 | XM_885173    | D930020B18Rik | NP                     |                                                                                                                                                                                                                                |
| T31355 | NM_053262    | Dhrs8         | NP                     |                                                                                                                                                                                                                                |
| T38250 | NM_010092    | Dyrk1b        | NP                     |                                                                                                                                                                                                                                |
| T39096 | NM_146867    | Olf131        | NP                     |                                                                                                                                                                                                                                |
| T39098 | NM_146852    | Olf1339       | NP                     |                                                                                                                                                                                                                                |
| T39100 | NM_146541    | Olf1361       | NP                     |                                                                                                                                                                                                                                |
| T39103 | NM_146467    | Olf1388       | NP                     |                                                                                                                                                                                                                                |
| T39105 | NM_146877    | Olf1395       | NP                     |                                                                                                                                                                                                                                |
| T39106 | NM_020515    | Olf140        | CONCORDANCE            | Kolterud A, Alenius M, Carlsson L, Bohm S. "The Lim homeobox gene Lhx2 is required for olfactory sensory neuron identity." Development 2004 Nov,131(21):5319-26                                                                |
| T39108 | NM_146881    | Olf1404       | NP                     |                                                                                                                                                                                                                                |
| T39109 | NM_146491    | Olf1410       | NP                     |                                                                                                                                                                                                                                |
| T39110 | NM_146410    | Olf1420       | NP                     |                                                                                                                                                                                                                                |
| T39111 | NM_146806    | Olf143        | NP                     |                                                                                                                                                                                                                                |
| T39114 | NM_146335    | Olf19         | NP                     |                                                                                                                                                                                                                                |
| T39115 | NM_001001807 | Olf234        | NP                     |                                                                                                                                                                                                                                |
| T39116 | NM_146606    | Olf24         | NP                     |                                                                                                                                                                                                                                |
| T39117 | NM_146457    | Olf282        | NP                     |                                                                                                                                                                                                                                |
| T39119 | NM_146281    | Olf284        | NP                     |                                                                                                                                                                                                                                |
| T39121 | NM_146538    | Olf315        | NP                     |                                                                                                                                                                                                                                |
| T39233 | NM_146374    | Olf368        | NP                     |                                                                                                                                                                                                                                |
| T39128 | NM_146722    | Olf429        | NP                     |                                                                                                                                                                                                                                |
| T39243 | NM_001011742 | Olf479        | NP                     |                                                                                                                                                                                                                                |
| T39244 | NM_146952    | Olf522        | NP                     |                                                                                                                                                                                                                                |
| T39260 | NM_147100    | Olf614        | NP                     |                                                                                                                                                                                                                                |
| T39261 | NM_147080    | Olf615        | NP                     |                                                                                                                                                                                                                                |
| T39266 | NM_013616    | Olf64         | NP                     |                                                                                                                                                                                                                                |
| T39268 | NM_147074    | Olf653        | NP                     |                                                                                                                                                                                                                                |
| T39271 | NM_013619    | Olf67         | NP                     |                                                                                                                                                                                                                                |
| T39272 | NM_146760    | Olf672        | NP                     |                                                                                                                                                                                                                                |
| T39275 | NM_207557    | Olf681        | NP                     |                                                                                                                                                                                                                                |
| T39277 | NM_001011857 | Olf685        | NP                     |                                                                                                                                                                                                                                |
| T39280 | NM_147061    | Olf691        | NP                     |                                                                                                                                                                                                                                |
| T39281 | NM_019486    | Olf71         | NP                     |                                                                                                                                                                                                                                |
| T39283 | NM_146392    | Olf720        | NP                     |                                                                                                                                                                                                                                |
| T39288 | NM_146664    | Olf734        | NP                     |                                                                                                                                                                                                                                |
| T39290 | NM_146666    | Olf736        | NP                     |                                                                                                                                                                                                                                |
| T39291 | NM_146299    | Olf745        | NP                     |                                                                                                                                                                                                                                |
| T39298 | NM_001011748 | Olf867        | NP                     |                                                                                                                                                                                                                                |
| T38655 | XM_485838    | Klhdc5        | NP                     |                                                                                                                                                                                                                                |
| T39259 | NM_147081    | Olf610        | NP                     |                                                                                                                                                                                                                                |
| T39300 | NM_146816    | Olf923        | NP                     |                                                                                                                                                                                                                                |
| T39302 | NM_146514    | Olf96         | NP                     |                                                                                                                                                                                                                                |
| T39548 | XM_980715    | EG231836      | NP                     |                                                                                                                                                                                                                                |
| T39251 | NM_146361    | Olf557        | NP                     |                                                                                                                                                                                                                                |
| T39050 | XM_001001987 | Brd1          | NP                     |                                                                                                                                                                                                                                |
| T39556 | XM_985665    | LOC671232     | NP                     |                                                                                                                                                                                                                                |
| T45078 | NM_010272    | Gdf11         | PARTIAL<br>CONCORDANCE | Nakashima M, Toyono T, Akamine A, Joyner A. " Expression of growth/differentiation factor 11, a new member of the BMP/TGFbeta superfamily during mouse embryogenesis." Mech Dev 1999 Feb,80(2):185-9                           |
| T30382 | XM_128924    | Rbm27         | NP                     |                                                                                                                                                                                                                                |
| T39160 | NM_147013    | Olf1038       | NP                     |                                                                                                                                                                                                                                |
| T39161 | NM_146577    | Olf1043       | NP                     |                                                                                                                                                                                                                                |
| T39162 | NM_147010    | Olf1052       | NP                     |                                                                                                                                                                                                                                |
| T39164 | NM_001011825 | Olf1105       | NP                     |                                                                                                                                                                                                                                |
| T39133 | NM_146821    | Olf629        | NP                     |                                                                                                                                                                                                                                |
| T39134 | NM_146814    | Olf665        | NP                     |                                                                                                                                                                                                                                |
| T39136 | NM_147032    | Olf705        | NP                     |                                                                                                                                                                                                                                |
| T39137 | NM_146682    | Olf76         | NP                     |                                                                                                                                                                                                                                |
| T39139 | NM_146330    | Olf958        | NP                     |                                                                                                                                                                                                                                |

|        |              |                |                     |                                                                                                                                                                                                                                        |
|--------|--------------|----------------|---------------------|----------------------------------------------------------------------------------------------------------------------------------------------------------------------------------------------------------------------------------------|
| T39141 | NM_146854    | Olf982         | NP                  |                                                                                                                                                                                                                                        |
| T39142 | NM_146855    | Olf985         | NP                  |                                                                                                                                                                                                                                        |
| T38787 | NM_009701    | Aap5           | NP                  |                                                                                                                                                                                                                                        |
| T39163 | NM_146767    | Olf1104        | NP                  |                                                                                                                                                                                                                                        |
| T39165 | NM_146752    | Olf1106        | NP                  |                                                                                                                                                                                                                                        |
| T39168 | NM_001011868 | Olf1178        | NP                  |                                                                                                                                                                                                                                        |
| T39169 | NM_146917    | Olf1179        | NP                  |                                                                                                                                                                                                                                        |
| T39171 | NM_146630    | Olf123         | NP                  |                                                                                                                                                                                                                                        |
| T39172 | NM_146789    | Olf1230        | NP                  |                                                                                                                                                                                                                                        |
| T39173 | NM_146454    | Olf1231        | NP                  |                                                                                                                                                                                                                                        |
| T39174 | NM_147062    | Olf124         | NP                  |                                                                                                                                                                                                                                        |
| T39175 | NM_146290    | Olf125         | NP                  |                                                                                                                                                                                                                                        |
| T39176 | NM_146794    | Olf1263        | NP                  |                                                                                                                                                                                                                                        |
| T39177 | NM_146793    | Olf1271        | NP                  |                                                                                                                                                                                                                                        |
| T39178 | NM_146396    | Olf1277        | NP                  |                                                                                                                                                                                                                                        |
| T39181 | NM_207240    | Olf1320        | NP                  |                                                                                                                                                                                                                                        |
| T39182 | NM_207631    | Olf1321        | NP                  |                                                                                                                                                                                                                                        |
| T39184 | NM_146390    | Olf1323        | NP                  |                                                                                                                                                                                                                                        |
| T39166 | NM_146661    | Olf1112        | NP                  |                                                                                                                                                                                                                                        |
| T39365 | AK047713     | C030016D13Rik  | NP                  |                                                                                                                                                                                                                                        |
| T39179 | NM_146400    | Olf1288        | NP                  |                                                                                                                                                                                                                                        |
| T39186 | NM_146398    | Olf1325        | NP                  |                                                                                                                                                                                                                                        |
| T39187 | NM_177061    | Olf1344        | NP                  |                                                                                                                                                                                                                                        |
| T39188 | NM_207136    | Olf1349        | NP                  |                                                                                                                                                                                                                                        |
| T39189 | NM_146389    | Olf1350        | NP                  |                                                                                                                                                                                                                                        |
| T39190 | NM_001011737 | Olf1357        | NP                  |                                                                                                                                                                                                                                        |
| T39192 | NM_146533    | Olf1367        | NP                  |                                                                                                                                                                                                                                        |
| T39199 | NM_146683    | Olf1441        | NP                  |                                                                                                                                                                                                                                        |
| T39201 | NM_146505    | Olf148         | NP                  |                                                                                                                                                                                                                                        |
| T39202 | NM_001011832 | Olf1490        | NP                  |                                                                                                                                                                                                                                        |
| T39203 | NM_146989    | Olf1496        | NP                  |                                                                                                                                                                                                                                        |
| T39204 | NM_008762    | Olf15          | NP                  |                                                                                                                                                                                                                                        |
| T39206 | NM_020514    | Olf1509        | NP                  |                                                                                                                                                                                                                                        |
| T39209 | NM_010983    | Olf2           | NP                  |                                                                                                                                                                                                                                        |
| T39210 | NM_146912    | Olf211         | NP                  |                                                                                                                                                                                                                                        |
| T39211 | NM_146759    | Olf214         | NP                  |                                                                                                                                                                                                                                        |
| T39212 | NM_001011789 | Olf222         | NP                  |                                                                                                                                                                                                                                        |
| T39213 | NM_146429    | Olf223         | NP                  |                                                                                                                                                                                                                                        |
| T39649 | NM_178214    | Hist2h2be      | NP                  |                                                                                                                                                                                                                                        |
| T40283 | AK014457     | Traf3ip1       | NP                  |                                                                                                                                                                                                                                        |
| T30408 | NM_027041    | 1700003M02Rik  | NP                  |                                                                                                                                                                                                                                        |
| T31480 | NM_146107    | Actr1b         | NP                  |                                                                                                                                                                                                                                        |
| T37968 | XM_203999    | Rapgef2        | NP                  |                                                                                                                                                                                                                                        |
| T63095 | XM_358344    | Cep2           | NP                  |                                                                                                                                                                                                                                        |
| T63370 | NM_028932    | Eaf1           | NP                  |                                                                                                                                                                                                                                        |
| T39758 | AK078387     | 6530439I21     | NP                  |                                                                                                                                                                                                                                        |
| T45417 | XM_917798    | Cecr2          | NP                  |                                                                                                                                                                                                                                        |
| T7707  | NM_146520    | Olf536         | NP                  |                                                                                                                                                                                                                                        |
| T7722  | NM_146339    | Olf77          | NP                  |                                                                                                                                                                                                                                        |
| T38844 | NM_183147    | Sprn           | NP                  |                                                                                                                                                                                                                                        |
| T70019 | MIMAT0001537 | mmu-miR-429    | NP                  |                                                                                                                                                                                                                                        |
| T70305 | MIMAT0000221 | mmu-miR-191    | NP                  |                                                                                                                                                                                                                                        |
| T70269 | MIMAT0000153 | mmu-miR-141    | NP                  |                                                                                                                                                                                                                                        |
| T70270 | MIMAT0000155 | mmu-miR-142-3p | NP                  |                                                                                                                                                                                                                                        |
| T70319 | MIMAT0000519 | mmu-miR-200a   | CONCORDANCE         | Choi PS, Zakhary L, Choi WY, Caron S, Alvarez-Saavedra E, Miska EA, McManus M, Harfe B, Giraldez AJ, Horvitz RH, Schier AF, Dulac C. "Members of the miRNA-200 family regulate olfactory neurogenesis." Neuron 2008 Jan 10,57(1):41-55 |
| T70321 | MIMAT0000657 | mmu-miR-200c   | NP                  |                                                                                                                                                                                                                                        |
| T70356 | MIMAT0000534 | mmu-miR-26b    | NP                  |                                                                                                                                                                                                                                        |
| T70358 | MIMAT0000126 | mmu-miR-27b    | NP                  |                                                                                                                                                                                                                                        |
| T1897  | NM_008245    | Hhex           | NP                  |                                                                                                                                                                                                                                        |
| T4827  | NM_027391    | O610009A07Rik  | NP                  |                                                                                                                                                                                                                                        |
| T37133 | NM_009375    | Tg             | NP                  |                                                                                                                                                                                                                                        |
| T45492 | NM_019804    | B4galt4        | NP                  |                                                                                                                                                                                                                                        |
| T328   | NM_029688    | Srxn1          | NP                  |                                                                                                                                                                                                                                        |
| T847   | NM_080289    | Grhpr          | NP                  |                                                                                                                                                                                                                                        |
| T4605  | NM_177322    | Agtr1          | NP                  |                                                                                                                                                                                                                                        |
| T5203  | NM_146154    | Ppp1r8         | NP                  |                                                                                                                                                                                                                                        |
| T2996  | NM_025384    | Dnaid1         | NP                  |                                                                                                                                                                                                                                        |
| T2213  | NM_027828    | 9030611O19Rik  | NP                  |                                                                                                                                                                                                                                        |
| T1096  | NM_025826    | Acad5b         | NP                  |                                                                                                                                                                                                                                        |
| T7620  | NM_007809    | Cyp17a1        | CONCORDANCE         | Keeney DS. "Perspectives in steroid hydroxylase gene expression: novel sites of expression during embryonic development." Endocr Res 1995 Feb-May,21(1-2):103-7                                                                        |
| T8009  | NM_013821    | Hsd3b6         | NP                  |                                                                                                                                                                                                                                        |
| T8283  | NM_153779    | Amid           | NP                  |                                                                                                                                                                                                                                        |
| T7281  | NM_026566    | 9430023L20Rik  | NP                  |                                                                                                                                                                                                                                        |
| T35021 | NM_025929    | 2010109I03Rik  | NP                  |                                                                                                                                                                                                                                        |
| T8218  | NM_026343    | Stx17          | NP                  |                                                                                                                                                                                                                                        |
| T6795  | NM_013463    | Gla            | NP                  |                                                                                                                                                                                                                                        |
| T6708  | NM_172398    | 2310005E10Rik  | NP                  |                                                                                                                                                                                                                                        |
| T7219  | NM_146099    | D19Wsu162e     | NP                  |                                                                                                                                                                                                                                        |
| T35261 | NM_008560    | Mc2r           | NP                  |                                                                                                                                                                                                                                        |
| T36524 | NM_008396    | Itga2          | NO CONCORDANCE      |                                                                                                                                                                                                                                        |
| T37215 | NM_011723    | Xdh            | NP                  |                                                                                                                                                                                                                                        |
| T36514 | NM_010568    | Insr           | NP                  |                                                                                                                                                                                                                                        |
| T36592 | NM_022883    | Lpin3          | NP                  |                                                                                                                                                                                                                                        |
| T9948  | NM_178098    | 4930486L24Rik  | NP                  |                                                                                                                                                                                                                                        |
| T37710 | NM_177653    | F830045P16Rik  | NP                  |                                                                                                                                                                                                                                        |
| T31041 | NM_133688    | Lyrn5          | NP                  |                                                                                                                                                                                                                                        |
| T35545 | NM_032005    | Tbx19          | CONCORDANCE         | Liu J, Lin C, Gleiberman A, Ohgi KA, Herman T, Huang HP, Tsai MJ, Rosenfeld MG. "Tbx19, a tissue-selective regulator of POMC gene expression." Proc Natl Acad Sci U S A 2001 Jul 17,98(15):8674-9                                      |
| T8212  | NM_020282    | Nqo2           | NP                  |                                                                                                                                                                                                                                        |
| T36053 | NM_138313    | Bmf            | NP                  |                                                                                                                                                                                                                                        |
| T38673 | NM_027533    | Tspan2         | NP                  |                                                                                                                                                                                                                                        |
| T70187 | MIMAT0000677 | mmu-miR-7a     | NP                  |                                                                                                                                                                                                                                        |
| T3842  | NM_007424    | Agc1           | CONCORDANCE         | Gori F, Schipani E, Demay MB. "Fibromodulin is expressed by both chondrocytes and osteoblasts during fetal bone development." J Cell Biochem 2001 Apr 2-27,82(1):46-57                                                                 |
| T50123 | NM_007492    | Arx            | CONCORDANCE         | Kawaguchi A, Ikawa T, Kasukawa T, Ueda HR, Kurimoto K, Saitou M, Matsuzaki F. "Single-cell gene profiling defines differential progenitor subclasses in mammalian neurogenesis." Development 2008 Sep,135(18):3113-24                  |
| T30231 | NM_007554    | Bmp4           | PARTIAL CONCORDANCE | Minina E, Wenzel HM, Kreschel C, Karp S, Gaffield W, McMahon AP, Vortkamp A, BMP and Ihh/PTHrP signaling interact to coordinate chondrocyte proliferation and differentiation., Development 2001 Nov,128(22):4523-34                   |
| T1147  | NM_009812    | Casp8          | NP                  |                                                                                                                                                                                                                                        |
| T8264  | NM_013487    | Cd3d           | NP                  |                                                                                                                                                                                                                                        |

|        |           |         |                                                  |                                                                                                                                                                                                                                                                                                                               |
|--------|-----------|---------|--------------------------------------------------|-------------------------------------------------------------------------------------------------------------------------------------------------------------------------------------------------------------------------------------------------------------------------------------------------------------------------------|
| T36133 | NM_007648 | Cd3e    | CONCORDANCE                                      | Dear TN, Boehm T. "Diverse mRNA expression patterns of the mouse calpain genes Capn5, Capn6 and Capn11 during development." <i>Mech Dev</i> 1999 Dec;89(1-2):201-9                                                                                                                                                            |
| T31237 | XM_985866 | Chd7    | CONCORDANCE                                      | Hurd EA, Capers PL, Blauwkamp MN, Adams ME, Raphael Y, Poucher HK, Martin DM, Loss of Chd7 function in gene-trapped reporter mice is embryonic lethal and associated with severe defects in multiple developing tissues. <i>Mamm Genome</i> 2007 Feb;18(2):94-104                                                             |
| T3863  | NM_009604 | Chrng   | CONCORDANCE                                      |                                                                                                                                                                                                                                                                                                                               |
| T4128  | NM_007701 | Chx10   | CONCORDANCE                                      | Rowan S, Chen CM, Young TL, Fisher DE, Cepko CL. "Transdifferentiation of the retina into pigmented cells in ocular retardation mice defines a new function of the homeodomain gene Chx10." <i>Development</i> 2004 Oct;131(20):5139-52                                                                                       |
| T30308 | NM_025771 | Cntnap2 | NP                                               |                                                                                                                                                                                                                                                                                                                               |
| T45058 | NM_009925 | Col10a1 | CONCORDANCE                                      | Long F, Zhang XM, Karp S, Yang Y, McMahon A., "Genetic manipulation of hedgehog signaling in the endochondral skeleton reveals a direct role in the regulation of chondrocyte proliferation." <i>Development</i> 2001 Dec;128(24):5099-108                                                                                    |
| T7865  | NM_007729 | Col11a1 | CONCORDANCE                                      | Yoshioka H, Iyama K, Inoguchi K, Khaleduzzaman M, Ninomiya Y, Ramirez F. "Developmental pattern of expression of the mouse alpha 1 (XI) collagen gene (Col11a1)." <i>Dev Dyn</i> 1995 Sep;204(1):41-7                                                                                                                         |
| T7815  | NM_009929 | Col18a1 | PARTIAL CONCORDANCE                              | Schmidt A, Wenzel D, Ferring I, Kazemi S, Sasaki T, Hescheler J, Timpl R, Addicks K, Fleischmann BK, Bloch W. "Influence of endostatin on embryonic vasculo- and angiogenesis." <i>Dev Dyn</i> 2004 Jul;230(3):468-80                                                                                                         |
| T38288 | NM_031163 | Col2a1  | CONCORDANCE                                      | Cheah KS, Lau ET, Au PK, Tam PP. "Expression of the mouse alpha 1(II) collagen gene is not restricted to cartilage during development." <i>Development</i> 1991 Apr;111(4):945-53                                                                                                                                             |
| T38288 | NM_031163 | Col2a1  | CONCORDANCE                                      | Cheah KS, Lau ET, Au PK, Tam PP. "Expression of the mouse alpha 1(II) collagen gene is not restricted to cartilage during development." <i>Development</i> 1991 Apr;111(4):945-53                                                                                                                                             |
| T9357  | NM_009931 | Col4a1  | NO CONCORDANCE                                   | Wu JE, Santoro SA. "Differential expression of integrin alpha subunits supports distinct roles during lung branching morphogenesis." <i>Dev Dyn</i> 1996 Jun;206(2):169-81                                                                                                                                                    |
| T63117 | NM_007736 | Col4a5  | PARTIAL CONCORDANCE                              | Jensen P, Magdaleno S, Lehman KM, Rice DS, Lavallie ER, Collins-Racie L, McCoy JM, Curran T. "A neurogenomics approach to gene expression analysis in the developing brain." <i>Brain Res Mol Brain Res</i> 2004 Dec 20;132(2):116-27                                                                                         |
| T30372 | NM_007740 | Col9a1  | CONCORDANCE                                      | Perala M, Savontaus M, Metsaranta M, Vuorio E. "Developmental regulation of mRNA species for types II, IX and XI collagens during mouse embryogenesis." <i>Biochem J</i> 1997 May 15;324(Pt 1):209-16                                                                                                                         |
| T1730  | NM_007741 | Col9a2  | PARTIAL CONCORDANCE                              | Perala M, Savontaus M, Metsaranta M, Vuorio E. "Developmental regulation of mRNA species for types II, IX and XI collagens during mouse embryogenesis." <i>Biochem J</i> 1997 May 15;324(Pt 1):209-16                                                                                                                         |
| T4617  | NM_009936 | Col9a3  | CONCORDANCE                                      | Perala M, Savontaus M, Metsaranta M, Vuorio E. "Developmental regulation of mRNA species for types II, IX and XI collagens during mouse embryogenesis." <i>Biochem J</i> 1997 May 15;324(Pt 1):209-16                                                                                                                         |
| T30201 | NM_007770 | Crx     | CONCORDANCE                                      | Chen S, Wang QL, Nie Z, Sun H, Lennon G, Copeland NG, Gilbert DJ, Jenkins NA, Zack DJ. "Crx, a novel Otx-like paired-homeodomain protein, binds to and transactivates photoreceptor cell-specific genes." <i>Neuron</i> 1997 Nov;19(5):1017-30                                                                                |
| T1845  | NM_009965 | Cryba1  | NP                                               |                                                                                                                                                                                                                                                                                                                               |
| T36200 | NM_007773 | Crybb2  | NP                                               |                                                                                                                                                                                                                                                                                                                               |
| T9121  | NM_007774 | Cryga   | CONCORDANCE                                      | Santhiya ST, Abd-alla SM, Loster J, Graw J. "Reduced levels of gamma-crystallin transcripts during embryonic development of murine Cat2nop mutant lenses." <i>Graefes Arch Clin Exp Ophthalmol</i> 1995 Dec;233(12):795-800                                                                                                   |
| T36210 | NM_013808 | Csrp3   | NP                                               |                                                                                                                                                                                                                                                                                                                               |
| T3071  | NM_173369 | Cyld    | NP                                               |                                                                                                                                                                                                                                                                                                                               |
| T50311 | NM_010055 | Dlx3    | CONCORDANCE                                      | Robinson GW, Mahon KA. "Differential and overlapping expression domains of Dlx-2 and Dlx-3 suggest distinct roles for Distal-less homeobox genes in craniofacial development." <i>Mech Dev</i> 1994 Dec;48(3):199-215                                                                                                         |
| T8112  | NM_010100 | Edar    | CONCORDANCE                                      | Aberg T, Wang XP, Kim JH, Yamashiro T, Bei M, Rice R, Ryoo HM, Thesleff I. "Runx2 mediates FGF signaling from epithelium to mesenchyme during tooth morphogenesis." <i>Dev Biol</i> 2004 Jun 1;270(1):76-93                                                                                                                   |
| T8244  | NM_175746 | Edaradd | CONCORDANCE                                      | Headon DJ, Emmal SA, Ferguson BM, Tucker AS, Justice MJ, Sharpe PT, Zonana J. "Overbeek PA, Gene defect in ectodermal dysplasia implicates a death domain adapter in development." <i>Nature</i> 2001 Dec 20-27;414(6866):913-6                                                                                               |
| T50378 | NM_010110 | Efnb1   | CONCORDANCE                                      | Bouillet P, Oulad-Abdelghani M, Vicaire S, Garnier JM, Schuhbauer B, Dolle P, Chambon P. "Efficient cloning of cDNAs of retinoic acid-responsive genes in P19 embryonal carcinoma cells and characterization of a novel mouse gene, Stra1 (mouse LERK-2/Eplq2)." <i>Dev Biol</i> 1995 Aug;170(2):420-33                       |
| T6240  | NM_010162 | Ext1    | NP                                               |                                                                                                                                                                                                                                                                                                                               |
| T3044  | NM_011812 | Fbln5   | CONCORDANCE                                      | Nakamura T, Ruiz-Lozano P, Lindner V, Yabe D, Taniwaki M, Furukawa Y, Kobuke K, Tashiro K, Lu Z, Andon NL, Schaub R, Matsumori A, Sasayama S, Chien KR, Honjo T. "DANCE, a novel secreted RGD protein expressed in developing, atherosclerotic, and balloon-injured arteries." <i>J Biol Chem</i> 1999 Aug 6;274(32):22476-83 |
| T6765  | NM_008001 | Fgd1    | CONCORDANCE                                      | Gorski JL, Estrada L, Hu C, Liu Z. "Skeletal-specific expression of fgd1 during bone formation and skeletal defects in facio-genital dysplasia (FGDY, aarskog syndrome)." <i>Dev Dyn</i> 2000 Aug;218(4):573-86                                                                                                               |
| T39648 | XM_977402 | Flnb    | CONCORDANCE                                      | Sheen VL, Feng Y, Graham D, Takafuta T, Shapiro SS, Walsh CA. "Filamin A and Filamin B are co-expressed within neurons during periods of neuronal migration and can physically interact." <i>Hum Mol Genet</i> 2002 Nov 1;11(23):2845-54                                                                                      |
| T36392 | NM_175473 | Fras1   | PARTIAL CONCORDANCE                              | Petrou P, Pavlakis E, Dalezios Y, Chalepakis G. "Basement membrane localization of Frem3 is independent of the Fras1/Frem1/Frem2 protein complex within the sublamina densa." <i>Matrix Biol</i> 2007 Oct;26(8):652-8                                                                                                         |
| T38972 | NM_172862 | Frem2   | CONCORDANCE                                      | Petrou P, Pavlakis E, Dalezios Y, Chalepakis G. "Basement membrane localization of Frem3 is independent of the Fras1/Frem1/Frem2 protein complex within the sublamina densa." <i>Matrix Biol</i> 2007 Oct;26(8):652-8                                                                                                         |
| T35447 | NM_008092 | Gata4   | CONCORDANCE                                      | Jacobsen CM, Narita N, Bielinska M, Syder AJ, Gordon JI, Wilson DB. "Genetic mosaic analysis reveals that GATA-4 is required for proper differentiation of mouse gastric epithelium." <i>Dev Biol</i> 2002 Jan 1;241(1):34-46                                                                                                 |
| T6369  | NM_008109 | Gdf5    | CONCORDANCE                                      | Kunath M, Ludecke HJ, Vortkamp A. "Expression of Trps1 during mouse embryonic development." <i>Mech Dev</i> 2002 Dec;119 Suppl 1():S117-20                                                                                                                                                                                    |
| T35451 | XM_136212 | Gli2    | NO CONCORDANCE (apparently): incomplete analysis | Hardcastle Z, Mo R, Hui CC, Sharpe PT. "The Shh signalling pathway in tooth development: defects in Gli2 and Gli3 mutants." <i>Development</i> 1998 Aug;125(15):2803-11                                                                                                                                                       |
| T50449 | NM_008130 | Gli3    | PARTIAL CONCORDANCE                              | Hui CC, Joyner AL. "A mouse model of greig cephalopolysyndactyly syndrome: the extra-toes1 mutation contains an intragenic deletion of the Gli3 gene." <i>Nat Genet</i> 1993 Mar;3(3):241-6                                                                                                                                   |
| T4529  | NM_016697 | Gpc3    | PARTIAL CONCORDANCE                              | Pellegrini M, Pilia G, Pantano S, Lucchini F, Uda M, Fumi M, Cao A, Schlessinger D, Forabosco A. "Gpc3 expression correlates with the phenotype of the Simpson-Golabi-Behmel syndrome." <i>Dev Dyn</i> 1998 Dec;213(4):431-9                                                                                                  |
| T1060  | NM_018882 | Gpr56   | NP                                               |                                                                                                                                                                                                                                                                                                                               |

|        |              |                     |                     |                                                                                                                                                                                                                                                                                                                                                                                        |
|--------|--------------|---------------------|---------------------|----------------------------------------------------------------------------------------------------------------------------------------------------------------------------------------------------------------------------------------------------------------------------------------------------------------------------------------------------------------------------------------|
| T5309  | NM_008264    | Hoxa13              | CONCORDANCE         | Warot X, Fromental-Ramain C, Fraulob V, Chambon P, Dolle P. "Gene dosage-dependent effects of the Hoxa-13 and Hoxd-13 mutations on morphogenesis of the terminal parts of the digestive and urogenital tracts." <i>Development</i> 1997 Dec,124(23):4781-91                                                                                                                            |
| T45097 | NM_008275    | Hoxd13              | CONCORDANCE         | Albrecht AN, Schwabe GC, Stricker S, Boddlich A, Wanker EE, Mundlos S. "The synpolydactyly homolog (spdh) mutation in the mouse -- a defect in patterning and growth of limb cartilage elements." <i>Mech Dev</i> 2002 Mar,112(1-2):53-67                                                                                                                                              |
| T1663  | NM_010544    | Ihh                 | CONCORDANCE         | Long F, Zhang XM, Karp S, Yang Y, McMahon AP. "Genetic manipulation of hedgehog signaling in the endochondral skeleton reveals a direct role in the regulation of chondrocyte proliferation." <i>Development</i> 2001 Dec,128(24):5099-108                                                                                                                                             |
| T3295  | NM_016851    | Irf6                | CONCORDANCE         | Knight AS, Schutte BC, Jiang R, Dixon MJ. "Developmental expression analysis of the mouse and chick orthologues of IRF6: The gene mutated in Van der Woude syndrome." <i>Dev Dyn</i> 2006 May,235(5):1441-7                                                                                                                                                                            |
| T30696 | NM_008397    | Itga6               | CONCORDANCE         | Salmivirta K, Gullberg D, Hirsch E, Altruda F, Ekblom P. "Integrin subunit expression associated with epithelial-mesenchymal interactions during murine tooth development." <i>Dev Dyn</i> 1996 Feb,205(2):104-13                                                                                                                                                                      |
| T3515  | NM_133663    | Itgb4               | CONCORDANCE         | Salmivirta K, Gullberg D, Hirsch E, Altruda F, Ekblom P. "Integrin subunit expression associated with epithelial-mesenchymal interactions during murine tooth development." <i>Dev Dyn</i> 1996 Feb,205(2):104-13                                                                                                                                                                      |
| T4827  | NM_027391    | Iyd (0610009A07Rik) | NP                  |                                                                                                                                                                                                                                                                                                                                                                                        |
| T63337 | NM_013822    | Jag1                | PARTIAL CONCORDANCE | Leimeister C, Schumacher N, Gessler M. "Expression of Notch pathway genes in the embryonic mouse metanephros suggests a role in proximal tubule development." <i>Gene Expr Patterns</i> 2003 Oct,3(5):595-8                                                                                                                                                                            |
| T2297  | NM_001002011 | Lmna                | NP                  |                                                                                                                                                                                                                                                                                                                                                                                        |
| T7624  | NM_010770    | Matn3               | NP                  |                                                                                                                                                                                                                                                                                                                                                                                        |
| T38227 | NM_010797    | Mid1                | CONCORDANCE         | Dal Zotto L, Quaderi NA, Elliott R, Lingerfelter PA, Carrel L, Valsecchi V, Montini E, Yen CH, Chapman V, Kalcheva I, Arrigo G, Zuffardi O, Thomas S, Willard HF, Ballabio A, Disteche CM, Rugarli EI. "The mouse Mid1 gene: implications for the pathogenesis of Opitz syndrome and the evolution of the mammalian pseudoautosomal region." <i>Hum Mol Genet</i> 1998 Mar,7(3):489-99 |
| T36632 | NM_008607    | Mmp13               | PARTIAL CONCORDANCE | Richardson RJ, Dixon J, Jiang R, Dixon MJ. "Integration of IRF6 and Jagged2 signalling is essential for controlling palatal adhesion and fusion competence." <i>Hum Mol Genet</i> 2009 Jul 15,18(14):2632-42                                                                                                                                                                           |
| T50722 | NM_008709    | Mycn                | CONCORDANCE         | Shimono A, Okuda T, Kondoh H. "N-myc-dependent repression of ndr1, a gene identified by direct subtraction of whole mouse embryo cDNAs between wild type and N-myc mutant." <i>Mech Dev</i> 1999 May,83(1-2):39-52                                                                                                                                                                     |
| T50700 | NM_010856    | Myh6                | CONCORDANCE         | Jones WK, Sanchez A, Robbins J. "Murine pulmonary myocardium: developmental analysis of cardiac gene expression." <i>Dev Dyn</i> 1994 Jun,200(2):117-28                                                                                                                                                                                                                                |
| T9977  | NM_010861    | Myl2                | CONCORDANCE         | Wang Z, Zhai W, Richardson JA, Olson EN, Meneses JJ, Firpo MT, Kang C, Skarnes WC, Tjian R. "Polybromo protein BAF180 functions in mammalian cardiac chamber maturation." <i>Genes Dev</i> 2004 Dec 15,18(24):3106-16                                                                                                                                                                  |
| T9966  | NM_010859    | Myl3                | CONCORDANCE         | Chuva de Sousa Lopes SM, Hassink RJ, Feijen A, van Rooijen MA, Doevendans PA, Tertoolen L, Brutel de la Riviere A, Mummery CL. "Patterning the heart, a template for human cardiomyocyte development." <i>Dev Dyn</i> 2006 Apr 28,235(7):1994-2002                                                                                                                                     |
| T6555  | NM_010877    | Ncf2                | NP                  |                                                                                                                                                                                                                                                                                                                                                                                        |
| T36683 | NM_010907    | Nfkbia              | PARTIAL CONCORDANCE | Schmidt-Ullrich R, Tobin DJ, Lenhard D, Schneider P, Paus R, Scheidereit C. "NF- $\kappa$ B transmits Eda A1/EdaR signalling to activate Shh and cyclin D1 expression, and controls post-initiation hair placode down growth." <i>Development</i> 2006 Mar,133(6):1045-57                                                                                                              |
| T36692 | NM_008711    | Nog                 | PARTIAL CONCORDANCE | Minina E, Schneider S, Rosowski M, Lauster R, Vortkamp A. Expression of Fgf and Tgfbeta signaling related genes during embryonic endochondral ossification. <i>Gene Expr Patterns</i> 2005 Dec,6(1):102-109                                                                                                                                                                            |
| T4975  | NM_173788    | Npr2                | CONCORDANCE         | DiCicco-Bloom E, Lelievre V, Zhou X, Rodriguez W, Tam J, Waschek JA. "Embryonic expression and multifunctional actions of the natriuretic peptides and receptors in the developing nervous system." <i>Dev Biol</i> 2004 Jul 1,271(1):161-75                                                                                                                                           |
| T50755 | NM_007430    | Nr0b1               | CONCORDANCE         | Ikeda Y, Swain A, Weber TJ, Hentges KE, Zanaria E, Lalli E, Tamai KT, Sassone-Corsi P, Lovell-Badge R, Camerino G, Parker KL. "Steroidogenic factor 1 and Dax-1 colocalize in multiple cell lineages: potential links in endocrine development." <i>Mol Endocrinol</i> 1996 Oct,10(10):1261-72                                                                                         |
| T36726 | NM_139310    | Otoa                | NP                  |                                                                                                                                                                                                                                                                                                                                                                                        |
| T4347  | NM_144841    | Otx2                | CONCORDANCE         | Rowan S, Chen CM, Young TL, Fisher DE, Cepko CL. "Transdifferentiation of the retina into pigmented cells in ocular retardation mice defines a new function of the homeodomain gene Chx10." <i>Development</i> 2004 Oct,131(20):5139-52                                                                                                                                                |
| T4347  | NM_144841    | Otx2                | CONCORDANCE         | Rowan S, Chen CM, Young TL, Fisher DE, Cepko CL. Transdifferentiation of the retina into pigmented cells in ocular retardation mice defines a new function of the homeodomain gene Chx10. <i>Development</i> 2004 Oct,131(20):5139-52                                                                                                                                                  |
| T10059 | NM_011864    | Papss2              | NP                  |                                                                                                                                                                                                                                                                                                                                                                                        |
| T36840 | NM_011037    | Pax2                | CONCORDANCE         | Dressler GR, Deutsch U, Chowdhury K, Nornes HO, Gruss P. "Pax2, a new murine paired-box-containing gene and its expression in the developing excretory system." <i>Development</i> 1990 Aug,109(4):787-95                                                                                                                                                                              |
| T30426 | NM_008781    | Pax3                | PARTIAL CONCORDANCE | Goulding MD, Chalepakis G, Deutsch U, Erselius JR, Gruss P. Pax-3, a novel murine DNA binding protein expressed during early neurogenesis. <i>EMBO J</i> 1991 May,10(5):1135-47                                                                                                                                                                                                        |
| T50782 | X63963       | Pax6                | CONCORDANCE         | Pulkkinen MA, Spencer-Dene B, Dickson C, Otonkoski T. "The IIIb isoform of fibroblast growth factor receptor 2 is required for proper growth and branching of pancreatic ductal epithelium but not for differentiation of exocrine or endocrine cells." <i>Mech Dev</i> 2003 Feb,120(2):167-75                                                                                         |
| T7528  | NM_011040    | Pax8                | CONCORDANCE         | Meunier D, Aubin J, Jeannotte L. "Perturbed thyroid morphology and transient hypothyroidism symptoms in Hoxa5 mutant mice." <i>Dev Dyn</i> 2003 Jul,227(3):367-78                                                                                                                                                                                                                      |
| T3544  | NM_175933    | Pex5                | NP                  |                                                                                                                                                                                                                                                                                                                                                                                        |
| T55145 | NM_011098    | Pitx2               | CONCORDANCE         | Martin DM, Skidmore JM, Fox SE, Gage PJ, Camper SA. "Pitx2 distinguishes subtypes of terminally differentiated neurons in the developing mouse neuroepithelium." <i>Dev Biol</i> 2002 Dec 1,252(1):84-99                                                                                                                                                                               |
| T7331  | NM_026651    | Pomgnt1             | NP                  |                                                                                                                                                                                                                                                                                                                                                                                        |
| T50868 | NM_008901    | Pou3f4              | PARTIAL CONCORDANCE | Somson MW, Wu W, Dasen JS, Flynn SE, Norman DJ, O'Connell SM, Gukovsky I, Carriere C, Ryan AK, Miller AP, Zuo L, Gleiberman AS, Andersen B, Beamer WG, Rosenfeld MG. "Pituitary lineage determination by the Prophet of Pit-1 homeodomain factor defective in Ames dwarfism." <i>Nature</i> 1996 Nov 28,384(6607):327-33                                                               |
| T36892 | XM_355243    | Prq4                | NP                  |                                                                                                                                                                                                                                                                                                                                                                                        |
| T63072 | NM_008957    | Ptch1               | CONCORDANCE         | Hardcastle Z, Mo R, Hui CC, Sharpe PT. "The Shh signalling pathway in tooth development: defects in Gli2 and Gli3 mutants." <i>Development</i> 1998 Aug,125(15):2803-11                                                                                                                                                                                                                |

|                                               |           |         |                        |                                                                                                                                                                                                                                                                                                                                                                                              |
|-----------------------------------------------|-----------|---------|------------------------|----------------------------------------------------------------------------------------------------------------------------------------------------------------------------------------------------------------------------------------------------------------------------------------------------------------------------------------------------------------------------------------------|
| T30126                                        | NM_011199 | Pthr1   | PARTIAL<br>CONCORDANCE | Karperien M, van Dijk TB, Hoelijmakers T, Cremers F, Abou-Samra AB, Boonstra J, de Laat SW, Defize LH, Expression pattern of parathyroid hormone/parathyroid hormone related peptide receptor mRNA in mouse postimplantation embryos indicates involvement in multiple developmental processes. Mech Dev 1994 Jul,47(1):29-42                                                                |
| T36944                                        | NM_009023 | Rapsn   | CONCORDANCE            | Michalk A, Stricker S, Becker J, Rupps R, Pantzar T, Miertus J, Botta G, Naretto VG, Janetzki C, Yaqoob N, Ott CE, Seelow D, Wieczorek D, Fiebig B, Wirth B, Hoopmann M, Walther M, Korber F, Blankenburg M, Mundlos S, Heller R, Hoffmann K. "Acetylcholine receptor pathway mutations explain various fetal akinesia deformation sequence disorders." Am J Hum Genet 2008 Feb,82(2):464-76 |
| T5407                                         | NM_013833 | Rax     | CONCORDANCE            | Shimogori T, Lee DA, Miranda-Angulo A, Yang Y, Wang H, Jiang L, Yoshida AC, Kataoka A, Mashiko H, Avetisyan M, Qi L, Qian J, Blackshaw S. A genomic atlas of mouse hypothalamic development. Nat Neurosci 2010 Jun;13(6):767-75.                                                                                                                                                             |
| T1490                                         | NM_021390 | Sall1   | CONCORDANCE            | Buck A, Kispert A, Kohlhase J. "Embryonic expression of the murine homologue of SALL1, the gene mutated in Townes-Brocks syndrome." Mech Dev 2001 Jun,104(1-2):143-6                                                                                                                                                                                                                         |
| T51007                                        | X76290    | Shh     | CONCORDANCE            | Aberg T, Wang XP, Kim JH, Yamashiro T, Bei M, Rice R, Ryoo HM, Thesleff I, Runx2 mediates FGF signaling from epithelium to mesenchyme during tooth morphogenesis. Dev Biol 2004 Jun 1,270(1):76-93                                                                                                                                                                                           |
| T55175                                        | NM_023990 | Six3    | CONCORDANCE            | Oliver G, Mailhos A, Wehr R, Copeland NG, Jenkins NA, Gruss P. "Six3, a murine homologue of the sine oculis gene, demarcates the most anterior border of the developing neural plate and is expressed during eye development." Development 1995 Dec,121(12):4045-55                                                                                                                          |
| T52                                           | NM_007885 | Slc26a2 | NP                     |                                                                                                                                                                                                                                                                                                                                                                                              |
| T5186                                         | NM_011448 | Sox9    | CONCORDANCE            | Lioubinski O, Muller M, Wegner M, Sander M. "Expression of Sox transcription factors in the developing mouse pancreas." Dev Dyn 2003 Jul,227(3):402-8                                                                                                                                                                                                                                        |
| T63422                                        | NM_009291 | Stra6   | NP                     |                                                                                                                                                                                                                                                                                                                                                                                              |
| T2550                                         | NM_011530 | Tap2    | NP                     |                                                                                                                                                                                                                                                                                                                                                                                              |
| T35545                                        | NM_032005 | Tbx19   | CONCORDANCE            | Liu J, Lin C, Gleiberman A, Ohgi KA, Herman T, Huang HP, Tsai MJ, Rosenfeld MG. "Tbx19, a tissue-selective regulator of POMC gene expression." Proc Natl Acad Sci U S A 2001 Jul 17,98(15):8674-9                                                                                                                                                                                            |
| T38911                                        | NM_194263 | Tbx20   | CONCORDANCE            | Mommersteeg MT, Brown NA, Prall OW, de Gier-de Vries C, Harvey RP, Moorman AF, Christoffels VM. Pitx2c and Nkx2-5 are required for the formation and identity of the pulmonary myocardium. Circ Res 2007 Oct 26,101(9):902-9                                                                                                                                                                 |
| T38116                                        | NM_011535 | Tbx3    | CONCORDANCE            | Gibson-Brown JJ. Mech Dev 1996 May;56(1-2):93-101                                                                                                                                                                                                                                                                                                                                            |
| T37121                                        | NM_009347 | Tecta   | CONCORDANCE            | Rau A, Legan PK, Richardson GP. "Tectorin mRNA expression is spatially and temporally restricted during mouse inner ear development." J Comp Neurol 1999 Mar 8,405(2):271-80                                                                                                                                                                                                                 |
| T6462                                         | NM_011577 | Tgfb1   | CONCORDANCE            | Aberg T, Wang XP, Kim JH, Yamashiro T, Bei M, Rice R, Ryoo HM, Thesleff I, Runx2 mediates FGF signaling from epithelium to mesenchyme during tooth morphogenesis. Dev Biol 2004 Jun 1,270(1):76-93                                                                                                                                                                                           |
| T3076                                         | NM_009372 | Tgif    | NP                     |                                                                                                                                                                                                                                                                                                                                                                                              |
| T4020                                         | NM_009405 | Tnni2   | NP                     |                                                                                                                                                                                                                                                                                                                                                                                              |
| T9973                                         | NM_009406 | Tnni3   | CONCORDANCE            | Mommersteeg MT, Brown NA, Prall OW, de Gier-de Vries C, Harvey RP, Moorman AF, Christoffels VM. "Pitx2c and Nkx2-5 are required for the formation and identity of the pulmonary myocardium." Circ Res 2007 Oct 26,101(9):902-9                                                                                                                                                               |
| T3683                                         | NM_011619 | Tnnt2   | NP                     |                                                                                                                                                                                                                                                                                                                                                                                              |
| T6295                                         | NM_011620 | Tnnt3   | NP                     |                                                                                                                                                                                                                                                                                                                                                                                              |
| T2646                                         | NM_022017 | Trpv4   | NP                     |                                                                                                                                                                                                                                                                                                                                                                                              |
| T38075                                        | NM_011652 | Ttn     | NP                     |                                                                                                                                                                                                                                                                                                                                                                                              |
| T38083                                        | NM_023478 | Upk3a   | NP                     |                                                                                                                                                                                                                                                                                                                                                                                              |
| <b>Notes: NP- not present in GXD database</b> |           |         |                        |                                                                                                                                                                                                                                                                                                                                                                                              |
