# Supplementary material for: A High-Resolution Anatomical Atlas of the Transcriptome in the Mouse Embryo
Source: PubMed Central journal article supplement (PMC3022534; doi:10.1371/journal.pbio.1000582), 2011-01-18
Supplement: pbio.1000582.s011.pdf [file pbio.1000582.s011.pdf]

| <b>Table S3. List of genes that display exclusive expression in selected structures</b> |             |                  |                      |
|-----------------------------------------------------------------------------------------|-------------|------------------|----------------------|
| TISSUE                                                                                  | Template ID | RefSeq accession | Gene symbol          |
| <i>CENTRAL NERVOUS SYSTEM</i>                                                           |             |                  |                      |
| Cerebral cortex                                                                         | T1569       | NM_023906        | Asb3                 |
| Cerebral cortex                                                                         | T4116       | NM_133733        | 9030425E11Rik        |
| Cerebral cortex                                                                         | T5339       | NM_133190        | Cacng8               |
| Cerebral cortex                                                                         | T7613       | NM_133750        | 3110048E14Rik        |
| Cerebral cortex                                                                         | T8641       | NM_013581        | Cog1                 |
| Cerebral cortex                                                                         | T8887       | NM_008151        | Gpr12                |
| Cerebral cortex                                                                         | T7122       | NM_016736        | 6330412F12Rik (Nub1) |
| Cerebral cortex                                                                         | T35200      | NM_177383        | Gpr21                |
| Cerebral cortex                                                                         | T2778       | NM_010903        | Nfe2l3               |
| Cerebral cortex                                                                         | T35433      | NM_175647        | Dmrta1               |
| Cerebral cortex                                                                         | T35847      | XR_005251        | A930024E05Rik        |
| Cerebral cortex                                                                         | T36070      | XM_355752        | Dgki                 |
| Cerebral cortex                                                                         | T9316       | NM_027135        | Sec24d               |
| Cerebral cortex                                                                         | T31018      | NM_021499        | Wdr8                 |
| Cerebral cortex                                                                         | T31985      | NM_027260        | Vrk2                 |
| Cerebral cortex                                                                         | T30457      | NM_008992        | Abcd4                |
| Cerebral cortex                                                                         | T37784      | NM_080795        | Lnx2                 |
| Cerebral cortex                                                                         | T40492      | AK018398         | 8430408J09Rik        |
| Cerebral cortex                                                                         | T45541      | NM_001014390     | Dyrk2                |
| Cerebral cortex                                                                         | T70151      | MIMAT0003491     | mmu-miR-701          |
| Corpus striatum                                                                         | T36964      | NM_172516        | Ripk5                |
| Thalamus                                                                                | T3840       | NM_018884        | Pdzrn3               |
| Thalamus                                                                                | T2359       | NM_023850        | Chst1                |
| Thalamus                                                                                | T4098       | NM_172310        | Tarsl2               |
| Thalamus                                                                                | T7610       | NM_178891        | Hrmt1l6              |
| Thalamus                                                                                | T35194      | NM_181543        | Gpr151               |
| Hypothalamus                                                                            | T36957      | NM_021892        | Rfrp                 |
| Hypothalamus                                                                            | T38159      | NM_177892        | A230097C02           |
| Hypothalamus                                                                            | T30773      | NM_009383        | Tial1                |
| Midbrain                                                                                | T8662       | NM_178625        | 2700094F01Rik        |
| Midbrain                                                                                | T35706      | NM_027760        | Rassf8               |
| Midbrain                                                                                | T36162      | NM_153105        | Cldn19               |
| Midbrain                                                                                | T37488      | NM_175651        | 9630008K15Rik        |
| Midbrain                                                                                | T36121      | NM_175631        | Cbln4                |
| Midbrain                                                                                | T31417      | NM_029945        | Smpd4                |
| Midbrain                                                                                | T2314       | NM_025897        | 1500003O22Rik        |
| Midbrain                                                                                | T38213      | NM_028065        | Tnrc5                |
| Midbrain                                                                                | T40280      | AK077915         | Mipol1               |
| Midbrain                                                                                | T45629      | XM_973549        | 4930589M24Rik        |
| Midbrain                                                                                | T45132      | XM_890447        | Mllt4                |
| Cerebellum                                                                              | T6536       | NM_028184        | Oraov1               |
| Cerebellum                                                                              | T35739      | NM_027519        | 6330406I15Rik        |
| Cerebellum                                                                              | T36476      | NM_015820        | Hs6st3               |
| Cerebellum                                                                              | T37027      | NM_009200        | Slc1a6               |
| Cerebellum                                                                              | T31051      | NM_029933        | Bcl9                 |
| Cerebellum                                                                              | T63352      | NM_207237        | Man1c1               |
| Cerebellum                                                                              | T63289      | NM_198678        | Sh3md2               |
| Pons                                                                                    | T35109      | NM_009766        | Brs3                 |
| Pons                                                                                    | T9940       | NM_026925        | Pnlip                |
| Pons                                                                                    | T2618       | NM_022408        | Es2el                |
| Pons                                                                                    | T36864      | NM_001001320     | Tbx10                |
| Pons                                                                                    | T38784      | NM_008022        | Foxd4                |
| Pons                                                                                    | T40239      | XM_989876        | 4631416L12Rik        |
| Medulla oblongata                                                                       | T3799       | NM_023438        | Gm644                |
| Medulla oblongata                                                                       | T5619       | NM_026012        | Nradd                |
| Medulla oblongata                                                                       | T35259      | NM_013582        | Lhcgr                |
| Medulla oblongata                                                                       | T35827      | NM_177358        | A630033E08Rik        |
| Medulla oblongata                                                                       | T35828      | NM_177255        | A630052C17Rik        |
| Medulla oblongata                                                                       | T36821      | XM_486090        | Nkx6-3               |
| Medulla oblongata                                                                       | T36197      | NM_170597        | Creq2                |
| Medulla oblongata                                                                       | T31600      | NM_181315        | Car5b                |
| Medulla oblongata                                                                       | T31319      | NM_028248        | 2610301K12Rik        |
| Medulla oblongata                                                                       | T38668      | NM_010586        | Itpr2                |
| Spinal cord                                                                             | T5360       | NM_008265        | Hoxa4                |
| Spinal cord                                                                             | T5313       | NM_010454        | Hoxa6                |
| Spinal cord                                                                             | T3054       | NM_144544        | 2210407C18Rik        |
| Spinal cord                                                                             | T36034      | NM_181422        | Pkd2l1               |
| Spinal cord                                                                             | T36325      | NM_139293        | Ece2                 |
| Spinal cord                                                                             | T35172      | NM_177330        | Ghsr                 |
| Spinal cord                                                                             | T35853      | NM_175352        | AA407659             |
| Spinal cord                                                                             | T37251      | NM_027401        | 1700010C24Rik        |
| Spinal cord                                                                             | T30543      | NM_016663        | Syt3                 |
| Spinal cord                                                                             | T38441      | NM_008226        | Hcn2                 |
| Spinal cord                                                                             | T37397      | XM_916223        | 4931429I11Rik        |
| Spinal cord                                                                             | T31587      | NM_026013        | Tmem77               |
| Spinal cord                                                                             | T38192      | NM_138948        | Cabp7                |
| Spinal cord                                                                             | T40298      | AK015488         | 4930459I23Rik        |
| Spinal cord                                                                             | T39753      | AK083519         | D030040B21           |
| Spinal cord                                                                             | T45276      | NM_145579        | P42pop               |
| Spinal cord                                                                             | T70096      | MIMAT0005292     | mmu-miR-582-3p       |
| Spinal cord                                                                             | T70406      | MIMAT0000567     | mmu-miR-329          |

|                                  |        |              |               |
|----------------------------------|--------|--------------|---------------|
| Cranial ganglia                  | T4202  | NM_028207    | Dusp3         |
| Cranial ganglia                  | T632   | NM_029031    | Carkl         |
| Cranial ganglia                  | T4705  | NM_019443    | Ndufa1        |
| Cranial ganglia                  | T5592  | NM_176848    | Fbxo2         |
| Cranial ganglia                  | T35378 | NM_175198    | 1700058C01Rik |
| Cranial ganglia                  | T35883 | NM_009620    | Adam4         |
| Cranial ganglia                  | T36751 | NM_053144    | Pcdhb19       |
| Cranial ganglia                  | T36312 | XM_917279    | Layn          |
| Cranial ganglia                  | T35839 | NM_177045    | Cc2d1b        |
| Cranial ganglia                  | T36635 | NM_001033339 | Mmp25         |
| Cranial ganglia                  | T37022 | NM_011390    | Slc12a7       |
| Cranial ganglia                  | T30923 | NM_138650    | Dgkq          |
| Cranial ganglia                  | T32139 | NM_133914    | Rasa4         |
| Cranial ganglia                  | T37566 | NM_181728    | Art3          |
| Cranial ganglia                  | T39008 | NM_178651    | Slc30a9       |
| Cranial ganglia                  | T39034 | NM_021332    | Glp1r         |
| Cranial ganglia                  | T37560 | NM_177781    | Trpa1         |
| Cranial ganglia                  | T30023 | NM_009831    | Ccng1         |
| Cranial ganglia                  | T37051 | NM_172841    | Slco5a1       |
| Cranial ganglia                  | T37651 | NM_029879    | D13Bwg1146e   |
| Cranial ganglia                  | T31259 | NM_145497    | BC016495      |
| Cranial ganglia                  | T37063 | NM_198214    | Snph          |
| Cranial ganglia                  | T40474 | AK083647     | D030059C06Rik |
| Cranial ganglia                  | T40506 | AK004446     | 1190002E22Rik |
| Cranial ganglia                  | T35036 | XM_134539    | 2310031A18Rik |
| <i>PERIPHERAL NERVOUS SYSTEM</i> |        |              |               |
| Sympathetic ganglia              | T3272  | NM_012026    | Rgnef         |
| Sympathetic ganglia              | T8010  | NM_008213    | Hand1         |
| Sympathetic ganglia              | T3514  | NM_172451    | Galnt6        |
| Sympathetic ganglia              | T35962 | NM_009726    | Atp7a         |
| Dorsal root ganglia              | T1499  | NM_177226    | Zfp629        |
| Dorsal root ganglia              | T3628  | NM_144817    | Camk1g        |
| Dorsal root ganglia              | T3678  | NM_134022    | 6330403K07Rik |
| Dorsal root ganglia              | T1199  | NM_019806    | Vapb          |
| Dorsal root ganglia              | T5536  | NM_023397    | 1810034K20Rik |
| Dorsal root ganglia              | T3282  | NM_026552    | Arpc4         |
| Dorsal root ganglia              | T3389  | NM_025947    | Dncl2a        |
| Dorsal root ganglia              | T3378  | NM_177262    | Pkn1          |
| Dorsal root ganglia              | T7848  | NM_178358    | Lhfp1         |
| Dorsal root ganglia              | T3053  | NM_009894    | Cideb         |
| Dorsal root ganglia              | T35608 | NM_026622    | 3110057012Rik |
| Dorsal root ganglia              | T36442 | NM_010305    | Gnai1         |
| Dorsal root ganglia              | T45437 | NM_199365    | 5330438103Rik |
| Dorsal root ganglia              | T70297 | MIMAT0000215 | mmu-miR-186   |
| <i>ALIMENTARY SYSTEM</i>         |        |              |               |
| Salivary glands                  | T992   | NM_026009    | 2610204L23Rik |
| Salivary glands                  | T4565  | NM_025884    | Ccdc16        |
| Salivary glands                  | T4570  | NM_027231    | Polr2f        |
| Salivary glands                  | T1153  | NM_126166    | Tlr3          |
| Salivary glands                  | T6034  | NM_025297    | Nrbf1         |
| Salivary glands                  | T5194  | NM_025920    | Thap4         |
| Salivary glands                  | T3931  | NM_019870    | Ard1          |
| Salivary glands                  | T994   | NM_023167    | Mrpl4         |
| Salivary glands                  | T1053  | NM_007991    | Fbl           |
| Salivary glands                  | T4266  | NM_181410    | Gtf2h3        |
| Salivary glands                  | T4653  | NM_146238    | BC023488      |
| Salivary glands                  | T4654  | NM_025644    | Exosc1        |
| Salivary glands                  | T4649  | NM_025298    | Polr3e        |
| Salivary glands                  | T4839  | NM_020483    | Hcngp         |
| Salivary glands                  | T4699  | NM_026421    | 2310057D15Rik |
| Salivary glands                  | T4918  | NM_172049    | Tmem18        |
| Salivary glands                  | T6193  | NM_144829    | 2310044P18Rik |
| Salivary glands                  | T6824  | NM_133756    | Xab1          |
| Salivary glands                  | T6826  | NM_025567    | Cyc1          |
| Salivary glands                  | T6808  | NM_145386    | BC005655      |
| Salivary glands                  | T8575  | NM_029418    | 9130401M01Rik |
| Salivary glands                  | T8298  | NM_053113    | Ear11         |
| Salivary glands                  | T35764 | NM_177136    | 9030227G01Rik |
| Salivary glands                  | T7090  | NM_053168    | Trim11        |
| Salivary glands                  | T7340  | NM_019910    | Dcpp          |
| Salivary glands                  | T8417  | NM_026744    | Mrpl53        |
| Salivary glands                  | T36466 | NM_010411    | Hdac3         |
| Salivary glands                  | T31763 | NM_023197    | 2310008H09Rik |
| Salivary glands                  | T36482 | NM_010489    | Hyal2         |
| Salivary glands                  | T30449 | NM_028604    | 2410075D05Rik |
| Salivary glands                  | T45583 | NM_028274    | Exosc6        |
| Salivary glands                  | T39150 | NM_053170    | Trim33        |
| Salivary glands                  | T38409 | XM_109726    | Thrap1        |
| Salivary glands                  | T39614 | Y15800       | Gprk6         |
| Salivary glands                  | T40565 | NM_001040026 | Sco1          |
| Salivary glands                  | T40143 | AK013632     | LOC434446     |
| Salivary glands                  | T40477 | AK156793     | Dnajc11       |
| Salivary glands                  | T63207 | NM_178640    | B3galnt2      |
| Salivary glands                  | T63369 | NM_207239    | Gtf3c1        |

|            |        |              |               |
|------------|--------|--------------|---------------|
| pharynx    | T35071 | XM 135805    | Wdr44         |
| pharynx    | T7055  | NM 146236    | Tceal1        |
| pharynx    | T37506 | NM 175511    | A130092J06Rik |
| pharynx    | T37713 | NM 027402    | Fndc5         |
| pharynx    | T39931 | AK044039     | LOC432809     |
| Oesophagus | T2189  | NM 029320    | D14Ertd581e   |
| Oesophagus | T30549 | NM 178711    | Plscr4        |
| Oesophagus | T30424 | NM 148942    | Serpnb6c      |
| Stomach    | T3497  | NM 001012392 | U46068        |
| Stomach    | T5284  | NM 145469    | 9330161F08Rik |
| Stomach    | T35959 | NM 009724    | Atp4b         |
| Stomach    | T37359 | NM 030181    | Vsig1         |
| Stomach    | T37452 | NM 025684    | 5730521E12Rik |
| Stomach    | T37039 | NM 053248    | Slc5a5        |
| Stomach    | T31264 | NM 027299    | Degs2         |
| Stomach    | T37839 | NM 001033366 | Dpcr1         |
| Intestine  | T6200  | NM 010893    | Neu1          |
| Intestine  | T8444  | NM 138646    | Hps4          |
| Intestine  | T7375  | NM 178308    | Abpg          |
| Intestine  | T4828  | NM 145932    | D630035O19Rik |
| Intestine  | T35459 | NM 013920    | Hnf4g         |
| Intestine  | T36820 | XM 134330    | Isx           |
| Intestine  | T36216 | XM 130038    | Cubn          |
| Intestine  | T36195 | XM 129769    | Cps1          |
| Intestine  | T31175 | NM 010739    | Muc13         |
| Intestine  | T31255 | NM 144807    | Chpt1         |
| Intestine  | T38238 | NM 027339    | 2210415F13Rik |
| Intestine  | T37860 | NM 001011873 | Xkr9          |
| Intestine  | T39400 | XR 003553    | LOC671753     |
| Intestine  | T2987  | NM 027307    | Golph2        |
| Intestine  | T2287  | NM 028189    | B3gnt3        |
| Intestine  | T32098 | NM 007769    | Dmbt1         |
| Intestine  | T37786 | XM 923886    | Gm53          |
| Liver      | T1660  | NM 011280    | Trim10        |
| Liver      | T452   | NM 146173    | 1300010A20Rik |
| Liver      | T3791  | NM 153567    | 5033405K12Rik |
| Liver      | T800   | NM 172759    | Ces5          |
| Liver      | T855   | NM 009127    | Scd1          |
| Liver      | T518   | NM 008934    | Proc          |
| Liver      | T887   | NM 010168    | F2            |
| Liver      | T867   | NM 133977    | Trf           |
| Liver      | T1441  | NM 008777    | Pah           |
| Liver      | T113   | NM 011270    | Rhced         |
| Liver      | T928   | NM 023383    | Aadac         |
| Liver      | T882   | NM 008124    | Gjb1          |
| Liver      | T1032  | NM 008878    | Serpinf2      |
| Liver      | T3836  | NM 138678    | Butr1         |
| Liver      | T1017  | NM 013782    | Ptdss2        |
| Liver      | T3940  | NM 019687    | Slc22a4       |
| Liver      | T4696  | NM 007931    | Endog         |
| Liver      | T2929  | NM 020583    | Isq20         |
| Liver      | T2794  | NM 008198    | H2-Bf         |
| Liver      | T4763  | NM 172577    | Slc25a21      |
| Liver      | T4783  | NM 010006    | Cyp2d9        |
| Liver      | T4794  | NM 146148    | C8a           |
| Liver      | T4813  | NM 174870    | Slc26a1       |
| Liver      | T4015  | NM 029269    | Spp2          |
| Liver      | T1352  | NM 174846    | 6230410P16Rik |
| Liver      | T3113  | NM 008385    | Inpp5b        |
| Liver      | T4399  | NM 016956    | Hbb-b2        |
| Liver      | T4928  | NM 008280    | Lipc          |
| Liver      | T4954  | NM 009778    | C3            |
| Liver      | T4955  | NM 007376    | Pzp           |
| Liver      | T705   | NM 013474    | Apoa2         |
| Liver      | T647   | NM 009695    | Apoc2         |
| Liver      | T715   | NM 023530    | Pla2g12b      |
| Liver      | T5324  | NM 001033981 | LOC544763     |
| Liver      | T5508  | NM 025988    | Acbd4         |
| Liver      | T6010  | NM 013551    | Hmbs          |
| Liver      | T6020  | NM 010196    | Fga           |
| Liver      | T1930  | NM 145824    | Ranbp10       |
| Liver      | T914   | NM 013475    | Apoh          |
| Liver      | T201   | NM 153143    | Kctd11        |
| Liver      | T1576  | NM 026157    | Papd1         |
| Liver      | T4729  | NM 017366    | Acadvl        |
| Liver      | T4876  | NM 144916    | BC014685      |
| Liver      | T4914  | NM 133997    | Apof          |
| Liver      | T4916  | NM 144869    | BC021614      |
| Liver      | T4901  | NM 021489    | F12           |
| Liver      | T4900  | NM 018816    | Apom          |
| Liver      | T918   | NM 009060    | Rqn           |
| Liver      | T6813  | NM 011787    | Amfr          |
| Liver      | T6738  | NM 011804    | Creg1         |
| Liver      | T7396  | NM 028066    | F11           |

|       |        |              |               |
|-------|--------|--------------|---------------|
| Liver | T6633  | NM 144533    | Nmnat3        |
| Liver | T7241  | NM 008341    | Igfbp1        |
| Liver | T4958  | NM 019447    | Hgfac         |
| Liver | T4997  | NM 144805    | Tmem40        |
| Liver | T4937  | NM 080844    | Serpinc1      |
| Liver | T4953  | NM 130452    | Bbox1         |
| Liver | T7876  | NM 013711    | Txnrd2        |
| Liver | T6096  | NM 144923    | Blvrb         |
| Liver | T7438  | NM 017371    | Hpxn          |
| Liver | T7460  | NM 022884    | Bhmt2         |
| Liver | T7462  | NM 008439    | Khk           |
| Liver | T8819  | NM 172406    | Als2cr3       |
| Liver | T8827  | NM 013848    | Ermap         |
| Liver | T8327  | NM 011414    | Slpi          |
| Liver | T9595  | NM 207204    | 4930519N13Rik |
| Liver | T6101  | NM 009775    | Bzrp          |
| Liver | T7233  | NM 009690    | Cd5l          |
| Liver | T2656  | NM 013484    | C2            |
| Liver | T9775  | NM 053149    | Hemgn         |
| Liver | T10041 | NM 008223    | Serpind1      |
| Liver | T9535  | NM 009479    | Uros          |
| Liver | T103   | NM 145365    | Creb3l3       |
| Liver | T544   | NM 010799    | Minpp1        |
| Liver | T659   | NM 012053    | Rpl8          |
| Liver | T572   | NM 031164    | F13b          |
| Liver | T663   | NM 008406    | Itih1         |
| Liver | T6652  | NM 026635    | 5730536A07Rik |
| Liver | T8083  | NM 008114    | Gfi1b         |
| Liver | T7377  | NM 011822    | Pigq          |
| Liver | T7388  | NM 008277    | Hpd           |
| Liver | T7065  | NM 027868    | Slc41a3       |
| Liver | T6647  | NM 008522    | Ltf           |
| Liver | T6734  | NM 019687    | Slc22a4       |
| Liver | T4533  | NM 013547    | Hgd           |
| Liver | T50012 | NM 010509    | Ifnar2        |
| Liver | T3028  | NM 007563    | Bpgm          |
| Liver | T35297 | NM 011465    | Spna1         |
| Liver | T35306 | NM 013838    | Trpc6         |
| Liver | T35925 | NM 007440    | Alox12        |
| Liver | T36774 | NM 008823    | Cfp           |
| Liver | T1370  | NM 007940    | Ephx2         |
| Liver | T2632  | NM 134249    | Timd2         |
| Liver | T36344 | NM 013513    | Epb4.2        |
| Liver | T36357 | NM 007976    | F5            |
| Liver | T36359 | NM 176935    | F730015K02Rik |
| Liver | T35159 | NM 007975    | F2rl3         |
| Liver | T35249 | NM 010605    | Kcnj5         |
| Liver | T35250 | NM 001033525 | Kcnk6         |
| Liver | T35158 | NM 010170    | F2rl2         |
| Liver | T1306  | NM 008877    | Plg           |
| Liver | T1305  | NM 026673    | 0610008C08Rik |
| Liver | T36422 | NM 008129    | Gclm          |
| Liver | T36685 | NM 008694    | Ngp           |
| Liver | T36891 | NM 008920    | Prq2          |
| Liver | T36894 | NM 016781    | Prkag1        |
| Liver | T36220 | NM 007807    | Cybb          |
| Liver | T36962 | NM 011269    | Rhaq          |
| Liver | T36371 | NM 030236    | Fbxo34        |
| Liver | T37562 | XM 139463    | Apol2         |
| Liver | T30515 | NM 010815    | Grap2         |
| Liver | T30513 | NM 026464    | Wdr55         |
| Liver | T30262 | NM 009146    | Frrs1         |
| Liver | T30528 | NM 011461    | Spic          |
| Liver | T30861 | NM 008525    | Alad          |
| Liver | T31177 | NM 177564    | BC022224      |
| Liver | T31242 | NM 181849    | Fqb           |
| Liver | T31238 | NM 010531    | Il18bp        |
| Liver | T36214 | NM 007800    | Ctsq          |
| Liver | T36584 | NM 008491    | Lcn2          |
| Liver | T36625 | NM 008572    | Mcpt8         |
| Liver | T37518 | NM 177115    | 37682         |
| Liver | T37548 | NM 026212    | Aqpat2        |
| Liver | T30120 | NM 016751    | Clec4f        |
| Liver | T30968 | NM 023737    | Ehhadh        |
| Liver | T31016 | NM 027062    | C8g           |
| Liver | T31697 | NM 178713    | Aldh8a1       |
| Liver | T37082 | NM 138673    | Stab2         |
| Liver | T36464 | NM 175000    | Hbq1          |
| Liver | T37646 | NM 023785    | Cxcl7         |
| Liver | T31265 | NM 178936    | Tmem56        |
| Liver | T38059 | NM 178931    | Tnfrsf14      |
| Liver | T31407 | NM 008254    | Hmqcl         |
| Liver | T38067 | NM 027763    | Trem1         |
| Liver | T38095 | NM 023500    | Xkh           |

|                              |        |              |               |
|------------------------------|--------|--------------|---------------|
| Liver                        | T31621 | NM 181420    | BC032265      |
| Liver                        | T39081 | NM 133246    | Ms4a3         |
| Liver                        | T39334 | XM 914077    | LOC545486     |
| Liver                        | T39919 | NM 001033488 | Gm1964        |
| Liver                        | T37793 | XM 001002626 | Gm323         |
| Liver                        | T31656 | NM 019949    | Ube2l6        |
| Liver                        | T39636 | NM 013730    | Slamf1        |
| Liver                        | T37994 | NM 173051    | Serpnb1c      |
| Liver                        | T63033 | NM 010575    | Itga2b        |
| Liver                        | T45073 | NM 010190    | Fcnb          |
| Liver                        | T45189 | S66283       | Spnb1         |
| Liver                        | T70034 | MIMAT0004870 | mmu-miR-453   |
| <i>RESPIRATORY SYSTEM</i>    |        |              |               |
| Trachea                      | T6962  | NM 133993    | Pwp1          |
| Lung                         | T6275  | NM 080434    | Apoa5         |
| Lung                         | T4913  | NM 054094    | Bucs1         |
| Lung                         | T6471  | NM 019734    | Asah1         |
| Lung                         | T6515  | NM 026434    | Rbm18         |
| Lung                         | T6164  | NM 145442    | Mbip          |
| Lung                         | T2760  | NM 172372    | Wdr45         |
| Lung                         | T8173  | NM 026812    | 1110033009Rik |
| Lung                         | T7968  | NM 028798    | 2300002G24Rik |
| Lung                         | T8216  | NM 008403    | Itqb1bp1      |
| Lung                         | T9979  | NM 011359    | Sftpc         |
| Lung                         | T48    | NM 011247    | Rbbp6         |
| Lung                         | T36440 | XM 977462    | Gm632         |
| Lung                         | T36888 | NM 138605    | Ppp1r3f       |
| Lung                         | T36222 | NM 007814    | Cyp2b19       |
| Lung                         | T37377 | XM 485433    | 4930544015Rik |
| Lung                         | T37174 | NM 009417    | Tpo           |
| Lung                         | T37797 | NM 001033246 | Gm172         |
| Lung                         | T36519 | NM 172161    | Irak2         |
| Lung                         | T39769 | AK034327     | 9330178D15    |
| Lung                         | T472   | NM 026210    | 1810036124Rik |
| <i>CARDIOVASCULAR SYSTEM</i> |        |              |               |
| Heart                        | T1670  | NM 013593    | Mb            |
| Heart                        | T2081  | NM 146242    | Lrrc10        |
| Heart                        | T1653  | NM 008726    | Nppb          |
| Heart                        | T5933  | NM 008590    | Mest          |
| Heart                        | T7325  | NM 008424    | Kcne1         |
| Heart                        | T4941  | NM 026977    | 1810031K17Rik |
| Heart                        | T4371  | NM 145367    | Txndc5        |
| Heart                        | T4400  | NM 011366    | Sh3d4         |
| Heart                        | T6397  | NM 013483    | Btn1a1        |
| Heart                        | T7934  | NM 011658    | Twist1        |
| Heart                        | T9824  | NM 023129    | Pln           |
| Heart                        | T4377  | NM 153805    | Pkn3          |
| Heart                        | T10016 | NM 008725    | Nppa          |
| Heart                        | T10015 | NM 013868    | Hspb7         |
| Heart                        | T9977  | NM 010861    | Myl2          |
| Heart                        | T9973  | NM 009406    | Tnni3         |
| Heart                        | T9980  | NM 022879    | Myl7          |
| Heart                        | T35348 | NM 026831    | Mybphl        |
| Heart                        | T45    | NM 028990    | 8430437G11Rik |
| Heart                        | T217   | NM 019750    | Nat6          |
| Heart                        | T186   | NM 009400    | Tnfrsf18      |
| Heart                        | T123   | NM 017470    | Dnalc4        |
| Heart                        | T1523  | NM 178641    | Inpp5f        |
| Heart                        | T303   | NM 021443    | Ccl8          |
| Heart                        | T1567  | NM 172383    | 6330530A05Rik |
| Heart                        | T30118 | NM 008965    | Ptger4        |
| Heart                        | T37660 | NM 001033129 | D6Ertd474e    |
| Heart                        | T31276 | NM 145499    | Cyp2c70       |
| Heart                        | T31371 | NM 007982    | Ptk2          |
| Heart                        | T31391 | NM 053115    | Acox2         |
| Heart                        | T31387 | NM 016922    | Gal3st1       |
| Heart                        | T31390 | NM 145597    | Tmem161a      |
| Heart                        | T31333 | XM 001003747 | 2010321M09Rik |
| Heart                        | T31354 | NM 010949    | Numb          |
| Heart                        | T31310 | XM 001002673 | 0610007L01Rik |
| Heart                        | T38248 | NM 134048    | Cbll1         |
| Heart                        | T39138 | NM 146417    | Olfir877      |
| Heart                        | T38777 | NM 001004162 | LOC432436     |
| Heart                        | T39388 | AJ278965     | Cd80          |
| Heart                        | T40560 | XM 905672    | Apold1        |
| Heart                        | T38815 | NM 139306    | Asah3l        |
| <i>LIMBS</i>                 |        |              |               |
| Limbs                        | T1777  | NM 010827    | Msc           |
| Limbs                        | T3345  | NM 029285    | 1700001C02Rik |
| Limbs                        | T6874  | NM 011905    | Tlr2          |
| Limbs                        | T35464 | NM 008274    | Hoxd12        |
| Limbs                        | T580   | NM 019950    | Chst5         |
| Limbs                        | T36606 | NM 010745    | Ly86          |
| Limbs                        | T36623 | NM 133197    | Mcf2          |

|                        |        |              |                |
|------------------------|--------|--------------|----------------|
| Limbs                  | T37492 | NM 172904    | Fsd2           |
| Limbs                  | T63298 | NM 026866    | Disp1          |
| Limbs                  | T70079 | MIMAT0004940 | mmu-miR-511    |
| Limbs                  | T70081 | MIMAT0002889 | mmu-miR-532-5p |
| <i>SKELETON</i>        |        |              |                |
| Skeleton               | T3537  | NM 198703    | Prkwnk1        |
| Skeleton               | T2205  | NM 144828    | Ppp1r1b        |
| Skeleton               | T1700  | NM 177693    | Lim2           |
| Skeleton               | T1555  | NM 020625    | Zfp297         |
| Skeleton               | T3639  | NM 023243    | Ccnh           |
| Skeleton               | T3619  | NM 139307    | Slitl2         |
| Skeleton               | T814   | NM 013664    | Sh3gl1         |
| Skeleton               | T858   | NM 025388    | Ufc1           |
| Skeleton               | T4520  | NM 178758    | C730027J19Rik  |
| Skeleton               | T2709  | NM 019575    | Scamp4         |
| Skeleton               | T4381  | NM 133831    | Gltscr2        |
| Skeleton               | T4425  | NM 026601    | Hyi            |
| Skeleton               | T5336  | NM 147097    | Olfir628       |
| Skeleton               | T6062  | NM 138668    | 1810047C23Rik  |
| Skeleton               | T3420  | NM 025448    | Ssr2           |
| Skeleton               | T2050  | NM 010098    | Opn3           |
| Skeleton               | T5133  | NM 172284    | Ddx19b         |
| Skeleton               | T5180  | NM 134058    | Pelo           |
| Skeleton               | T5899  | NM 053092    | Kars           |
| Skeleton               | T2289  | NM 025395    | Chchd5         |
| Skeleton               | T4713  | NM 025974    | Rpl14          |
| Skeleton               | T4905  | NM 172935    | 5730457F11Rik  |
| Skeleton               | T1774  | NM 009666    | Amelx          |
| Skeleton               | T6421  | NM 009046    | Relb           |
| Skeleton               | T5752  | NM 025903    | Ifrd2          |
| Skeleton               | T5801  | NM 011970    | Psmb2          |
| Skeleton               | T7659  | NM 025872    | Golt1b         |
| Skeleton               | T9604  | NM 015781    | Nap1l1         |
| Skeleton               | T4964  | NM 028769    | Syvn1          |
| Skeleton               | T2918  | NM 011354    | Serf2          |
| Skeleton               | T23    | NM 144787    | Jmjd2c         |
| Skeleton               | T2872  | NM 026612    | Ndufb2         |
| Skeleton               | T37220 | NM 174877    | Zar1           |
| Skeleton               | T30261 | NM 016715    | Tpte2          |
| Skeleton               | T37477 | NM 001024926 | Cyb5d2         |
| Skeleton               | T37148 | NM 027865    | Tmem25         |
| Skeleton               | T30672 | NM 026000    | Psm9           |
| Skeleton               | T37052 | NM 011408    | Slfn2          |
| Skeleton               | T38197 | NM 030137    | Cstad          |
| Skeleton               | T39901 | XM 894331    | EG629441       |
| Skeleton               | T39900 | AK038984     | LOC432449      |
| Skeleton               | T31673 | NM 007985    | Fancc          |
| Skeleton               | T39412 | NM 010748    | Lyst           |
| Skeleton               | T31828 | NM 025749    | Zfp474         |
| Skeleton               | T39450 | BC100377     | AU022751       |
| <i>SKELETAL MUSCLE</i> |        |              |                |
| Skeletal muscle        | T6124  | NM 007386    | Aco1           |
| Skeletal muscle        | T32146 | NM 172872    | Ankrd38        |
| Skeletal muscle        | T35071 | XM 135805    | Wdr44          |
| Skeletal muscle        | T7055  | NM 146236    | Tceal1         |
| Skeletal muscle        | T37506 | NM 175511    | A130092J06Rik  |
| Skeletal muscle        | T37713 | NM 027402    | Fndc5          |
| Skeletal muscle        | T5857  | NM 134011    | Tbrg4          |
| Skeletal muscle        | T6305  | NM 175356    | Pik4cb         |
| Skeletal muscle        | T6511  | NM 021524    | Pbef1          |
| Skeletal muscle        | T6529  | NM 010209    | Fh1            |
| Skeletal muscle        | T6124  | NM 007386    | Aco1           |
| Skeletal muscle        | T10017 | NM 028115    | Trub1          |
| Skeletal muscle        | T36425 | NM 010834    | Gdf8           |
| Skeletal muscle        | T2452  | NM 009605    | Adipoq         |
| Skeletal muscle        | T36831 | NM 172585    | Larp5          |
| Skeletal muscle        | T38370 | XM 137117    | Adamts14       |
| Skeletal muscle        | T40448 | AK078202     | 6430502G17Rik  |
| Skeletal muscle        | T40349 | BC027793     | Scfd1          |
| Skeletal muscle        | T39628 | XM 001004492 | LOC677542      |
| Skeletal muscle        | T45652 | XM 001003389 | LOC676704      |
| <i>SKIN</i>            |        |              |                |
| Skin                   | T1554  | NM 026186    | 1300013D05Rik  |
| Skin                   | T2218  | NM 031998    | Tsga14         |
| Skin                   | T947   | NM 020036    | Calm4          |
| Skin                   | T417   | NM 010118    | Egr2           |
| Skin                   | T4450  | NM 146063    | BC031593       |
| Skin                   | T2531  | NM 007394    | Acvr1          |
| Skin                   | T3020  | NM 025296    | Wdr39          |
| Skin                   | T3331  | NM 028712    | Rap2b          |
| Skin                   | T3349  | NM 009374    | Tgm3           |
| Skin                   | T1585  | NM 029291    | Ascc2          |
| Skin                   | T6367  | NM 007927    | Emd            |
| Skin                   | T6712  | NM 146097    | Cbwd1          |

|                             |        |              |               |
|-----------------------------|--------|--------------|---------------|
| Skin                        | T8259  | NM_180588    | 2700029E10Rik |
| Skin                        | T5156  | NM_172845    | Adamts4       |
| Skin                        | T7619  | NM_029810    | Nt5c2         |
| Skin                        | T50010 | NM_010456    | Hoxa9         |
| Skin                        | T50016 | AB038697     | Olig2         |
| Skin                        | T373   | NM_021450    | Trpm7         |
| Skin                        | T35716 | XM_001000101 | Tnks2         |
| Skin                        | T37586 | XM_893176    | Znrf3         |
| Skin                        | T37334 | NM_001033397 | Krt26         |
| Skin                        | T36617 | NM_016693    | Map3k6        |
| Skin                        | T36993 | NM_022886    | Scel          |
| Skin                        | T30441 | NM_178381    | Trp53i5       |
| Skin                        | T38055 | NM_205820    | Tlr13         |
| Skin                        | T31298 | NM_025911    | Ccdc91        |
| Skin                        | T31349 | NM_029012    | Sppl3         |
| Skin                        | T31544 | NM_025408    | Phca          |
| Skin                        | T38469 | NM_001003911 | Adamts7       |
| Skin                        | T38458 | XM_980092    | Krt28         |
| Skin                        | T38473 | NM_213728    | Krt72         |
| Skin                        | T39062 | NM_011310    | S100a3        |
| <i>HAEMOLYMPHOID SYSTEM</i> |        |              |               |
| Thymus                      | T861   | NM_013640    | Psmb10        |
| Thymus                      | T99    | NM_025626    | 3110001A13Rik |
| Thymus                      | T4485  | NM_026362    | 5033414D02Rik |
| Thymus                      | T4494  | NM_013796    | Nagpa         |
| Thymus                      | T4542  | NM_145139    | Eif3s6ip      |
| Thymus                      | T5657  | NM_178698    | Pigv          |
| Thymus                      | T3123  | NM_028126    | 2610019A05Rik |
| Thymus                      | T2708  | NM_027185    | Def6          |
| Thymus                      | T2726  | NM_023260    | Mrps34        |
| Thymus                      | T4411  | NM_010545    | Ii            |
| Thymus                      | T2550  | NM_011530    | Tap2          |
| Thymus                      | T4559  | NM_009387    | Tk1           |
| Thymus                      | T1147  | NM_009812    | Casp8         |
| Thymus                      | T4593  | NM_146011    | Arhgap9       |
| Thymus                      | T4621  | NM_023372    | Rpl38         |
| Thymus                      | T5480  | NM_025624    | 2510048006Rik |
| Thymus                      | T4631  | NM_027139    | Taf9          |
| Thymus                      | T5489  | NM_025907    | 1600013P15Rik |
| Thymus                      | T5499  | NM_025582    | 2810405K02Rik |
| Thymus                      | T5515  | NM_030711    | Arts1         |
| Thymus                      | T5538  | NM_198031    | Tubgcp3       |
| Thymus                      | T3407  | NM_010220    | Fkbp5         |
| Thymus                      | T1867  | NM_010370    | Gzma          |
| Thymus                      | T5124  | NM_146205    | Armc5         |
| Thymus                      | T5126  | NM_153795    | BC032204      |
| Thymus                      | T2086  | NM_172468    | 4732481H14Rik |
| Thymus                      | T5288  | NM_053180    | Ccrk          |
| Thymus                      | T5298  | NM_009761    | Bnip3l        |
| Thymus                      | T2148  | NM_153788    | Centb1        |
| Thymus                      | T4840  | NM_199016    | Enpp4         |
| Thymus                      | T4679  | NM_026829    | Mthfs         |
| Thymus                      | T5383  | NM_016684    | Zfp96         |
| Thymus                      | T5916  | NM_134154    | AW491445      |
| Thymus                      | T6732  | NM_010378    | H2-Aa         |
| Thymus                      | T6710  | NM_026070    | 2900091E11Rik |
| Thymus                      | T6701  | NM_010696    | Lcp2          |
| Thymus                      | T5700  | NM_007497    | Atf1          |
| Thymus                      | T7039  | NM_175397    | 5830484A20Rik |
| Thymus                      | T7306  | NM_013566    | Itqb7         |
| Thymus                      | T6175  | NM_024253    | Nkg7          |
| Thymus                      | T6132  | NM_009151    | Selpl         |
| Thymus                      | T6119  | NM_008279    | Map4k1        |
| Thymus                      | T6395  | NM_022024    | Gmfg          |
| Thymus                      | T6429  | NM_009277    | Trim21        |
| Thymus                      | T5756  | NM_010379    | H2-Ab1        |
| Thymus                      | T6500  | NM_021327    | Tnip1         |
| Thymus                      | T8062  | NM_172435    | P2ry10        |
| Thymus                      | T8264  | NM_013487    | Cd3d          |
| Thymus                      | T9559  | NM_033606    | Dqx1          |
| Thymus                      | T9583  | NM_011053    | Pdcd11        |
| Thymus                      | T6541  | NM_010386    | H2-DMa        |
| Thymus                      | T6570  | NM_008225    | Hcls1         |
| Thymus                      | T6555  | NM_010877    | Ncf2          |
| Thymus                      | T533   | NM_026192    | Calcoco1      |
| Thymus                      | T6567  | NM_145559    | Slc2a9        |
| Thymus                      | T35102 | NM_175105    | Aqp11         |
| Thymus                      | T35018 | NM_178650    | Tbc1d10c      |
| Thymus                      | T35758 | NM_030732    | Tbl1xr1       |
| Thymus                      | T6711  | NM_008152    | Gpr65         |
| Thymus                      | T7349  | NM_010693    | Lck           |
| Thymus                      | T9917  | NM_207246    | Rasgrp3       |
| Thymus                      | T7093  | NM_008368    | Il2rb         |
| Thymus                      | T9918  | NM_001004184 | MGC74379      |

|                       |        |              |               |
|-----------------------|--------|--------------|---------------|
| Thymus                | T3025  | NM 011190    | Psme2         |
| Thymus                | T2028  | NM 183264    | 5830405N20Rik |
| Thymus                | T35133 | NM 007720    | Ccr8          |
| Thymus                | T35190 | NM 019925    | Gpr132        |
| Thymus                | T35655 | NM 028657    | F630110N24Rik |
| Thymus                | T36240 | NM 173028    | Vps13a        |
| Thymus                | T2801  | NM 007651    | Cd53          |
| Thymus                | T2820  | NM 134116    | Gpsm3         |
| Thymus                | T2888  | NM 023137    | Ubd           |
| Thymus                | T2937  | NM 016933    | Ptprcap       |
| Thymus                | T36133 | NM 007648    | Cd3e          |
| Thymus                | T1223  | NM 028058    | Fundc1        |
| Thymus                | T1211  | NM 009533    | Xrcc5         |
| Thymus                | T3455  | NM 018729    | Cd244         |
| Thymus                | T2454  | NM 013542    | Gzmb          |
| Thymus                | T2424  | NM 172900    | Siglec10      |
| Thymus                | T35818 | XM 905818    | A430107D22Rik |
| Thymus                | T37003 | NM 017461    | Sept1         |
| Thymus                | T36899 | NM 011159    | Prkdc         |
| Thymus                | T36907 | NM 013585    | Psemb9        |
| Thymus                | T36908 | NM 025959    | Psmc6         |
| Thymus                | T36215 | NM 009985    | Ctsw          |
| Thymus                | T36527 | NM 008400    | Itgal         |
| Thymus                | T36949 | NM 018750    | Rassf5        |
| Thymus                | T31100 | NM 021274    | Cxcl10        |
| Thymus                | T31131 | NM 133978    | Cmtm7         |
| Thymus                | T31140 | NM 011854    | Oasl2         |
| Thymus                | T30531 | NM 027222    | 2010001M09Rik |
| Thymus                | T30282 | NM 019583    | Il17rb        |
| Thymus                | T30799 | NM 145545    | Gbp6          |
| Thymus                | T31172 | NM 007763    | Crip1         |
| Thymus                | T31200 | NM 009895    | Cish          |
| Thymus                | T31211 | NM 030253    | Parp9         |
| Thymus                | T38318 | NM 025846    | Rras2         |
| Thymus                | T38314 | NM 025396    | Pgls          |
| Thymus                | T31243 | NM 007783    | Csk           |
| Thymus                | T36293 | XM 908064    | Dnajc13       |
| Thymus                | T36570 | NM 013707    | Krtap14       |
| Thymus                | T36604 | NM 013825    | Ly75          |
| Thymus                | T9961  | NM 008527    | Klrb1c        |
| Thymus                | T37770 | NM 183390    | Klhl6         |
| Thymus                | T30348 | XM 486159    | 2310066E14Rik |
| Thymus                | T36501 | NM 008359    | Il17ra        |
| Thymus                | T36123 | NM 009138    | Ccl25         |
| Thymus                | T37006 | NM 008458    | Serpina3c     |
| Thymus                | T37053 | NM 011409    | Slfn3         |
| Thymus                | T31279 | NM 008365    | Il18r1        |
| Thymus                | T31285 | NM 019640    | Pitpnb        |
| Thymus                | T38070 | NM 021053    | Tscot         |
| Thymus                | T31336 | NM 026218    | Fgfr1op2      |
| Thymus                | T31435 | NM 023514    | Mrps9         |
| Thymus                | T31590 | XM 916862    | Nalp6         |
| Thymus                | T31931 | NM 001038664 | Gngt2         |
| Thymus                | T38672 | NM 028785    | Dock8         |
| Thymus                | T39052 | NM 011815    | Fyb           |
| Thymus                | T39623 | XM 622820    | LOC547338     |
| Thymus                | T8284  | NM 010161    | Evi2a         |
| Thymus                | T45280 | NM 175479    | A330008L17Rik |
| Thymus                | T45003 | AK030875     | A1427122      |
| Thymus                | T31637 | NM 010724    | Psemb8        |
| Thymus                | T38286 | NM 007645    | Cd37          |
| Thymus                | T31443 | NM 016857    | Exoc7         |
| Thymus                | T63013 | NM 018872    | D1Bwq0491e    |
| Thymus                | T491   | NM 178911    | Pld4          |
| Spleen                | T30275 | NM 013591    | Madcam1       |
| Spleen                | T30080 | NM 009875    | Cdkn1b        |
| <i>URINARY SYSTEM</i> |        |              |               |
| Kidney                | T4745  | NM 177450    | Cndp1         |
| Kidney                | T4117  | NM 207680    | Bcl2l11       |
| Kidney                | T1002  | NM 026183    | 1300013j15Rik |
| Kidney                | T995   | NM 008269    | Hoxb6         |
| Kidney                | T299   | NM 146028    | Stac2         |
| Kidney                | T6362  | AK166607     | Steap2        |
| Kidney                | T7563  | NM 133894    | Ugt2b38       |
| Kidney                | T8699  | NM 013910    | Fbxl10        |
| Kidney                | T7626  | NM 009327    | Tcf1          |
| Kidney                | T5441  | NM 153535    | BC035537      |
| Kidney                | T455   | NM 015749    | Tcn2          |
| Kidney                | T9926  | NM 026085    | 3110049J23Rik |
| Kidney                | T1358  | NM 021517    | Pdzk1         |
| Kidney                | T35983 | NM 173427    | Klhdc7a       |
| Kidney                | T7191  | NM 146071    | Muc20         |
| Kidney                | T36846 | NM 008982    | Ptprj         |
| Kidney                | T30840 | NM 008116    | Ggt1          |



|                            |        |              |               |
|----------------------------|--------|--------------|---------------|
| Kidney                     | T30857 | NM_007607    | Car4          |
| Kidney                     | T37514 | NM_001004150 | A4galt        |
| Kidney                     | T30962 | NM_027857    | Acy3          |
| Kidney                     | T31050 | NM_016785    | Tpmt          |
| Kidney                     | T37659 | XM_284236    | D630042F21Rik |
| Kidney                     | T31548 | NM_178413    | BC051244      |
| Kidney                     | T31646 | NM_133962    | Arhgef18      |
| Kidney                     | T32005 | NM_030021    | D730039F16Rik |
| Kidney                     | T38208 | NM_010018    | Dao1          |
| Kidney                     | T39640 | XM_001003628 | 1110060D06Rik |
| Kidney                     | T51042 | BC022226     | Slc5a2        |
| Kidney                     | T51027 | NM_183354    | Slc12a1       |
| Bladder                    | T3986  | NM_018802    | Syt8          |
| Bladder                    | T5860  | NM_027320    | Ifi35         |
| <i>REPRODUCTIVE SYSTEM</i> |        |              |               |
| Male                       | T5995  | NM_009357    | Tex261        |
| Male                       | T6691  | NM_029763    | Polr3f        |
| Male                       | T6628  | NM_027838    | Senp8         |
| Male                       | T6854  | NM_170591    | Nupl1         |
| Male                       | T7684  | NM_025274    | Dppa5         |
| Male                       | T4919  | NM_018869    | Gprk5         |
| Male                       | T2609  | NM_011901    | Taf7          |
| Male                       | T484   | NM_008508    | Lor           |
| Male                       | T8093  | NM_009337    | Tcl1          |
| Male                       | T36303 | NM_139218    | Dppa3         |
| Male                       | T233   | NM_145546    | Gtf2b         |
| Male                       | T3460  | NM_011328    | Sct           |
| Male                       | T2492  | NM_030564    | Rnf34         |
| Male                       | T37312 | NM_028034    | 2410004F06Rik |
| Male                       | T31260 | NM_146198    | Slc5a11       |
| Male                       | T37647 | XM_125673    | Cxxc6         |
| Male                       | T31584 | NM_001010826 | Kctd14        |
| Male                       | T39844 | BC059932     | 2410025L10Rik |
| Male                       | T63197 | NM_145833    | Lin28         |
| Male                       | T39525 | AK145040     | Gtf3c3        |
| Male                       | T39854 | NM_001042503 | Trim71        |
| Male                       | T70394 | MIMAT0000538 | mmu-miR-31    |
| Male                       | T35928 | NM_007445    | Amh           |
| Female                     | T9706  | NM_026489    | Hormad1       |
| Female                     | T36277 | NM_010029    | Ddx4          |
| Female                     | T40010 | XR_002340    | 6330411D24Rik |
| <i>SENSORY ORGANS</i>      |        |              |               |
| Ear                        | T4760  | NM_024412    | Clnka         |
| Ear                        | T36726 | NM_139310    | Otoa          |
| Ear                        | T37121 | NM_009347    | Tecta         |
| Ear                        | T37122 | NM_009350    | Tenr          |
| Ear                        | T37639 | XM_908254    | Cldn22        |
| Ear                        | T30400 | NM_010953    | Oc90          |
| Ear                        | T38650 | NM_001018019 | AY616753      |
| Ear                        | T40039 | XM_992778    | EG624918      |
| Ear                        | T45144 | NM_013624    | Otog          |
| Ear                        | T31019 | NM_027172    | 2310046K01Rik |
| Ear                        | T37802 | NM_001009574 | Taar5         |
| Ear                        | T37815 | NM_001033292 | Espnl         |
| Eye                        | T1692  | NM_153158    | E130308A19Rik |
| Eye                        | T9121  | NM_007774    | Cryga         |
| Eye                        | T1845  | NM_009965    | Cryba1        |
| Eye                        | T35173 | NM_016975    | Gja3          |
| Eye                        | T35175 | NM_008123    | Gja8          |
| Eye                        | T30651 | NM_009751    | Bfsp1         |
| Eye                        | T37225 | NM_178679    | Zfp365        |
| Eye                        | T39036 | NM_011939    | Hsf4          |
| Eye                        | T36200 | NM_007773    | Crybb2        |
| Eye                        | T36517 | XM_909063    | Ipo8          |
| Eye                        | T37688 | XR_005138    | E130119H09Rik |
| Eye                        | T36110 | NM_007601    | Capn3         |
| Eye                        | T37644 | NM_153076    | Crygn         |
| Eye                        | T30396 | NM_019689    | Arid3b        |
| Eye                        | T32146 | NM_172872    | Ankrd38       |
| Eye                        | T40285 | NM_028736    | Grip1         |
| Eye                        | T39505 | AK043703     | A830021M18    |
| Eye                        | T39438 | XM_112126    | Nhs           |
| Eye                        | T45578 | NM_028029    | Dnmbp         |
| Nose                       | T818   | NM_176963    | Galm          |
| Nose                       | T410   | NM_134017    | Mat2b         |
| Nose                       | T910   | NM_007954    | Es1           |
| Nose                       | T4777  | NM_009997    | Cyp2a4        |
| Nose                       | T4445  | NM_008971    | Ptk9          |
| Nose                       | T4562  | NM_201234    | D630030L16Rik |
| Nose                       | T5330  | NM_147091    | Olfir568      |
| Nose                       | T5328  | NM_146822    | Olfir640      |
| Nose                       | T5333  | NM_147072    | Olfir641      |
| Nose                       | T5353  | XM_358344    | Cep2          |
| Nose                       | T5260  | NM_146177    | Suv420h2      |

|      |        |              |                |
|------|--------|--------------|----------------|
| Nose | T2137  | NM 024244    | 1200015N20Rik  |
| Nose | T163   | NM 133699    | Atp6v1c2       |
| Nose | T5331  | NM 001011536 | Olf566         |
| Nose | T5322  | NM 147088    | Olf569         |
| Nose | T5314  | NM 147085    | Olf571         |
| Nose | T5317  | NM 147115    | Olf578         |
| Nose | T5319  | NM 147052    | Olf589         |
| Nose | T5321  | NM 013621    | Olf69          |
| Nose | T1094  | NM 008867    | Pla2g1br       |
| Nose | T4312  | NM 203509    | NP_TR6JSE50FPA |
| Nose | T4182  | NM 144917    | Rbed1          |
| Nose | T4357  | NM 198311    | Ttc8           |
| Nose | T4186  | NM 173862    | BC030396       |
| Nose | T6320  | NM 030074    | Zfp687         |
| Nose | T7397  | NM 183161    | BC019537       |
| Nose | T5943  | NM 020276    | Nelf           |
| Nose | T6318  | NM 027548    | Serpinb7       |
| Nose | T7771  | NM 178414    | BC048390       |
| Nose | T6385  | NM 198623    | Ubqln3         |
| Nose | T6328  | NM 008299    | Dnajb3         |
| Nose | T6981  | NM 172338    | Dnajc16        |
| Nose | T7794  | NM 080467    | Atp6v0a4       |
| Nose | T7787  | NM 011126    | Plunc          |
| Nose | T7824  | NM 028934    | 4930452B06Rik  |
| Nose | T7821  | NM 175402    | Rbm15b         |
| Nose | T7855  | NM 001008230 | Gm605          |
| Nose | T7204  | NM 011183    | Psen2          |
| Nose | T6415  | NM 001004066 | Zfp386         |
| Nose | T7539  | NM 177406    | MGC25972       |
| Nose | T7540  | NM 021372    | Sertad2        |
| Nose | T7694  | NM 013809    | Cyp2g1         |
| Nose | T7704  | NM 008578    | Mef2b          |
| Nose | T7712  | NM 018751    | Sult1c1        |
| Nose | T8055  | NM 201370    | BC052883       |
| Nose | T7591  | NM 007647    | Entpd5         |
| Nose | T8722  | NM 027977    | 2310001A20Rik  |
| Nose | T8770  | NM 182995    | 6330503K22Rik  |
| Nose | T4143  | NM 144536    | Cdkal1         |
| Nose | T348   | NM 145355    | Rnf185         |
| Nose | T7494  | NM 144820    | 1700009P13Rik  |
| Nose | T8482  | NM 029992    | A930031F18Rik  |
| Nose | T8814  | NM 009370    | Tgfb1          |
| Nose | T35025 | XM 888129    | 2300003P22Rik  |
| Nose | T35057 | XM 485677    | 2410131K14Rik  |
| Nose | T35016 | NM 027238    | 1810054D07Rik  |
| Nose | T35079 | NM 028258    | Dzip1l         |
| Nose | T35768 | XM 001005685 | 9130229H14Rik  |
| Nose | T35785 | NM 001024619 | Lrrc54         |
| Nose | T8171  | NM 023247    | 4733401H18Rik  |
| Nose | T8176  | NM 009477    | Upp1           |
| Nose | T7916  | NM 028226    | 3000004N20Rik  |
| Nose | T9480  | NM 028298    | Zfp655         |
| Nose | T3960  | NM 145973    | Ell3           |
| Nose | T35322 | NM 134216    | V1rh7          |
| Nose | T35935 | NM 023617    | Aox3           |
| Nose | T3062  | NM 011260    | Reg3g          |
| Nose | T35981 | NM 175516    | Lrrn6c         |
| Nose | T77    | NM 172891    | Styk1          |
| Nose | T387   | NM 144890    | BC018465       |
| Nose | T7114  | NM 016807    | Sdcbp          |
| Nose | T7206  | NM 017465    | Sult2b1        |
| Nose | T35644 | NM 025725    | Ccdc96         |
| Nose | T35650 | XM 910825    | 4921528H16Rik  |
| Nose | T36192 | NM 007755    | Cpeb1          |
| Nose | T35476 | NM 181853    | Trim66         |
| Nose | T35444 | NM 019739    | Foxo1          |
| Nose | T3496  | NM 023631    | Aox4           |
| Nose | T36638 | NM 026779    | Mocos          |
| Nose | T37020 | NM 145838    | St8sia6        |
| Nose | T30873 | NM 007837    | Ddit3          |
| Nose | T30926 | NM 145532    | Mall           |
| Nose | T31110 | NM 023135    | Sult1e1        |
| Nose | T31771 | NM 134109    | Ildr1          |
| Nose | T30516 | NM 172205    | Sbsn           |
| Nose | T30226 | NM 145554    | Ldlrap1        |
| Nose | T30794 | NM 028634    | Pgea1          |
| Nose | T31226 | NM 009736    | Bag1           |
| Nose | T38110 | NM 031391    | Gtf2a1         |
| Nose | T31239 | BC031933     | Lipl3          |
| Nose | T38356 | XM 924923    | Fmo6           |
| Nose | T9396  | NM 026298    | 4930553F24Rik  |
| Nose | T9430  | NM 008448    | Kif5b          |
| Nose | T36587 | NM 144556    | Lgi4           |
| Nose | T37399 | XM 133663    | 4931431F19Rik  |

|      |        |              |               |
|------|--------|--------------|---------------|
| Nose | T37336 | XM 143418    | Ankrd35       |
| Nose | T37388 | XM 127142    | 4930573I19Rik |
| Nose | T37531 | NM 177389    | Mia3          |
| Nose | T37532 | NM 178778    | A930041I02Rik |
| Nose | T30379 | BC049156     | Ift74         |
| Nose | T30323 | NM 009379    | Thpo          |
| Nose | T31714 | NM 001001182 | Baz2b         |
| Nose | T4455  | NM 198023    | Rcor1         |
| Nose | T30681 | NM 178775    | Rps6kc1       |
| Nose | T37038 | XM 925590    | Slc4a11       |
| Nose | T35795 | NM 172836    | 9930021J03Rik |
| Nose | T30419 | XM 908714    | Cnfn          |
| Nose | T30412 | NM 053184    | Ugt2a1        |
| Nose | T30420 | NM 001039042 | Klk13         |
| Nose | T30395 | XM 978169    | Cep63         |
| Nose | T31250 | NM 175250    | 2810007J24Rik |
| Nose | T37668 | XM 885173    | D930020B18Rik |
| Nose | T31355 | NM 053262    | Dhrs8         |
| Nose | T38250 | NM 010092    | Dyrk1b        |
| Nose | T39096 | NM 146867    | Olfr131       |
| Nose | T39098 | NM 146852    | Olfr1339      |
| Nose | T39100 | NM 146541    | Olfr1361      |
| Nose | T39103 | NM 146467    | Olfr1388      |
| Nose | T39105 | NM 146877    | Olfr1395      |
| Nose | T39106 | NM 020515    | Olfr140       |
| Nose | T39108 | NM 146881    | Olfr1404      |
| Nose | T39109 | NM 146491    | Olfr1410      |
| Nose | T39110 | NM 146410    | Olfr1420      |
| Nose | T39111 | NM 146806    | Olfr143       |
| Nose | T39114 | NM 146335    | Olfr19        |
| Nose | T39115 | NM 001001807 | Olfr234       |
| Nose | T39116 | NM 146606    | Olfr24        |
| Nose | T39117 | NM 146457    | Olfr282       |
| Nose | T39119 | NM 146281    | Olfr284       |
| Nose | T39121 | NM 146538    | Olfr315       |
| Nose | T39233 | NM 146374    | Olfr368       |
| Nose | T39128 | NM 146722    | Olfr429       |
| Nose | T39243 | NM 001011742 | Olfr479       |
| Nose | T39244 | NM 146952    | Olfr522       |
| Nose | T39260 | NM 147100    | Olfr614       |
| Nose | T39261 | NM 147080    | Olfr615       |
| Nose | T39266 | NM 013616    | Olfr64        |
| Nose | T39268 | NM 147074    | Olfr653       |
| Nose | T39271 | NM 013619    | Olfr67        |
| Nose | T39272 | NM 146760    | Olfr672       |
| Nose | T39275 | NM 207557    | Olfr681       |
| Nose | T39277 | NM 001011857 | Olfr685       |
| Nose | T39280 | NM 147061    | Olfr691       |
| Nose | T39281 | NM 019486    | Olfr71        |
| Nose | T39283 | NM 146392    | Olfr720       |
| Nose | T39288 | NM 146664    | Olfr734       |
| Nose | T39290 | NM 146666    | Olfr736       |
| Nose | T39291 | NM 146299    | Olfr745       |
| Nose | T39298 | NM 001011748 | Olfr867       |
| Nose | T38655 | XM 485838    | Klhdc5        |
| Nose | T39259 | NM 147081    | Olfr610       |
| Nose | T39300 | NM 146816    | Olfr923       |
| Nose | T39302 | NM 146514    | Olfr96        |
| Nose | T39548 | XM 980715    | EG231836      |
| Nose | T39251 | NM 146361    | Olfr557       |
| Nose | T39050 | XM 001001987 | Brd1          |
| Nose | T39556 | XM 985665    | LOC671232     |
| Nose | T45078 | NM 010272    | Gdf11         |
| Nose | T30382 | XM 128924    | Rbm27         |
| Nose | T39160 | NM 147013    | Olfr1038      |
| Nose | T39161 | NM 146577    | Olfr1043      |
| Nose | T39162 | NM 147010    | Olfr1052      |
| Nose | T39164 | NM 001011825 | Olfr1105      |
| Nose | T39133 | NM 146821    | Olfr629       |
| Nose | T39134 | NM 146814    | Olfr665       |
| Nose | T39136 | NM 147032    | Olfr705       |
| Nose | T39137 | NM 146682    | Olfr76        |
| Nose | T39139 | NM 146330    | Olfr958       |
| Nose | T39141 | NM 146854    | Olfr982       |
| Nose | T39142 | NM 146855    | Olfr985       |
| Nose | T38787 | NM 009701    | Aqp5          |
| Nose | T39163 | NM 146767    | Olfr1104      |
| Nose | T39165 | NM 146752    | Olfr1106      |
| Nose | T39168 | NM 001011868 | Olfr1178      |
| Nose | T39169 | NM 146917    | Olfr1179      |
| Nose | T39171 | NM 146630    | Olfr123       |
| Nose | T39172 | NM 146789    | Olfr1230      |
| Nose | T39173 | NM 146454    | Olfr1231      |
| Nose | T39174 | NM 147062    | Olfr124       |

|                         |        |              |                |
|-------------------------|--------|--------------|----------------|
| Nose                    | T39175 | NM 146290    | Olfr125        |
| Nose                    | T39176 | NM 146794    | Olfr1263       |
| Nose                    | T39177 | NM 146793    | Olfr1271       |
| Nose                    | T39178 | NM 146396    | Olfr1277       |
| Nose                    | T39181 | NM 207240    | Olfr1320       |
| Nose                    | T39182 | NM 207631    | Olfr1321       |
| Nose                    | T39184 | NM 146390    | Olfr1323       |
| Nose                    | T39166 | NM 146661    | Olfr1112       |
| Nose                    | T39365 | AK047713     | C030016D13Rik  |
| Nose                    | T39179 | NM 146400    | Olfr1288       |
| Nose                    | T39186 | NM 146398    | Olfr1325       |
| Nose                    | T39187 | NM 177061    | Olfr1344       |
| Nose                    | T39188 | NM 207136    | Olfr1349       |
| Nose                    | T39189 | NM 146389    | Olfr1350       |
| Nose                    | T39190 | NM 001011737 | Olfr1357       |
| Nose                    | T39192 | NM 146533    | Olfr1367       |
| Nose                    | T39199 | NM 146683    | Olfr1441       |
| Nose                    | T39201 | NM 146505    | Olfr148        |
| Nose                    | T39202 | NM 001011832 | Olfr1490       |
| Nose                    | T39203 | NM 146989    | Olfr1496       |
| Nose                    | T39204 | NM 008762    | Olfr15         |
| Nose                    | T39206 | NM 020514    | Olfr1509       |
| Nose                    | T39209 | NM 010983    | Olfr2          |
| Nose                    | T39210 | NM 146912    | Olfr211        |
| Nose                    | T39211 | NM 146759    | Olfr214        |
| Nose                    | T39212 | NM 001011789 | Olfr222        |
| Nose                    | T39213 | NM 146429    | Olfr223        |
| Nose                    | T39649 | NM 178214    | Hist2h2be      |
| Nose                    | T40283 | AK014457     | Traf3ip1       |
| Nose                    | T30408 | NM 027041    | 1700003M02Rik  |
| Nose                    | T31480 | NM 146107    | Actr1b         |
| Nose                    | T37968 | XM 203999    | Rapgef2        |
| Nose                    | T63095 | XM 358344    | Cep2           |
| Nose                    | T63370 | NM 028932    | Eaf1           |
| Nose                    | T39758 | AK078387     | 6530439I21     |
| Nose                    | T45417 | XM 917798    | Cecr2          |
| Nose                    | T7707  | NM 146520    | Olfr536        |
| Nose                    | T7722  | NM 146339    | Olfr77         |
| Nose                    | T38844 | NM 183147    | Sprn           |
| Nose                    | T70019 | MIMAT0001537 | mmu-miR-429    |
| Nose                    | T70305 | MIMAT0000221 | mmu-miR-191    |
| Nose                    | T70269 | MIMAT0000153 | mmu-miR-141    |
| Nose                    | T70270 | MIMAT0000155 | mmu-miR-142-3p |
| Nose                    | T70319 | MIMAT0000519 | mmu-miR-200a   |
| Nose                    | T70321 | MIMAT0000657 | mmu-miR-200c   |
| Nose                    | T70356 | MIMAT0000534 | mmu-miR-26b    |
| Nose                    | T70358 | MIMAT0000126 | mmu-miR-27b    |
| <i>ENDOCRINE ORGANS</i> |        |              |                |
| Thyroid                 | T1897  | NM 008245    | Hhex           |
| Thyroid                 | T4827  | NM 027391    | 0610009A07Rik  |
| Thyroid                 | T37133 | NM 009375    | Tg             |
| Thyroid                 | T45492 | NM 019804    | B4galt4        |
| Adrenal gland           | T328   | NM 029688    | Srxn1          |
| Adrenal gland           | T847   | NM 080289    | Grhpr          |
| Adrenal gland           | T4605  | NM 177322    | Agtr1          |
| Adrenal gland           | T5203  | NM 146154    | Ppp1r8         |
| Adrenal gland           | T2996  | NM 025384    | Dnajd1         |
| Adrenal gland           | T2213  | NM 027828    | 9030611019Rik  |
| Adrenal gland           | T1096  | NM 025826    | Acadsb         |
| Adrenal gland           | T7620  | NM 007809    | Cyp17a1        |
| Adrenal gland           | T8009  | NM 013821    | Hsd3b6         |
| Adrenal gland           | T8283  | NM 153779    | Amid           |
| Adrenal gland           | T7281  | NM 026566    | 9430023L20Rik  |
| Adrenal gland           | T35021 | NM 025929    | 2010109I03Rik  |
| Adrenal gland           | T8218  | NM 026343    | Stx17          |
| Adrenal gland           | T6795  | NM 013463    | Gla            |
| Adrenal gland           | T6708  | NM 172398    | 2310005E10Rik  |
| Adrenal gland           | T7219  | NM 146099    | D19Wsu162e     |
| Adrenal gland           | T35261 | NM 008560    | Mc2r           |
| Adrenal gland           | T36524 | NM 008396    | Itga2          |
| Adrenal gland           | T37215 | NM 011723    | Xdh            |
| Adrenal gland           | T36514 | NM 010568    | Insr           |
| Adrenal gland           | T36592 | NM 022883    | Lpin3          |
| Adrenal gland           | T9948  | NM 178098    | 4930486L24Rik  |
| Adrenal gland           | T37710 | NM 177653    | F830045P16Rik  |
| Adrenal gland           | T31041 | NM 133688    | Lym5           |
| Pituitary gland         | T35545 | NM 032005    | Tbx19          |
| Pituitary gland         | T8212  | NM 020282    | Nqo2           |
| Pituitary gland         | T36053 | NM 138313    | Bmf            |
| Pituitary gland         | T38673 | NM 027533    | Tspan2         |
| Pituitary gland         | T70187 | MIMAT0000677 | mmu-miR-7a     |
