# Supplementary material for: A High-Resolution Anatomical Atlas of the Transcriptome in the Mouse Embryo
Source: PubMed Central journal article supplement (PMC3022534; doi:10.1371/journal.pbio.1000582), 2011-01-18
Supplement: pbio.1000582.s012.pdf [file pbio.1000582.s012.pdf]

**Table S4.** Distribution of genes with restricted spatial expression in different anatomical structures.

| Structure                        | Structure-specific genes (n) | Genes with unknown function (n) |
|----------------------------------|------------------------------|---------------------------------|
| <b>Central nervous system</b>    |                              |                                 |
| <i>Forebrain</i>                 |                              |                                 |
| Cerebral cortex                  | 20                           | 4                               |
| Corpus striatum                  | 1                            |                                 |
| Thalamus                         | 5                            | -                               |
| Hypothalamus                     | 3                            | 1                               |
| <i>Midbrain</i>                  | <i>11</i>                    | 3                               |
| <i>Hindbrain</i>                 |                              |                                 |
| Cerebellum                       | 7                            | 1                               |
| Pons                             | 6                            | 1                               |
| Medulla oblongata                | 10                           | 3                               |
| Spinal cord                      | 18                           | 6                               |
| Cranial ganglia                  | 25                           | 6                               |
| <b>Peripheral nervous system</b> |                              |                                 |
| Spinal ganglia                   | 14                           | 4                               |
| Sympathetic ganglia              | 4                            | -                               |
| <b>Alimentary system</b>         |                              |                                 |
| Salivary glands                  | 39                           | 10                              |
| Pharynx                          | 5                            | 2                               |
| Esophagus                        | 3                            | 1                               |
| Stomach                          | 8                            | 3                               |
| Intestine                        | 17                           | 3                               |
| Liver                            | 146                          | 15                              |
| <b>Respiratory system</b>        |                              |                                 |
| Trachea                          | 1                            | -                               |
| Lung                             | 20                           | 7                               |
| <b>Heart</b>                     |                              |                                 |
|                                  | 41                           | 7                               |

|                            |     |    |
|----------------------------|-----|----|
| <b>Limbs</b>               | 11  | 1  |
| <b>Skeleton</b>            | 45  | 6  |
| <b>Skeletal muscle</b>     | 20  | 4  |
| <b>Skin</b>                | 32  | 3  |
| <b>Hemolymphoid system</b> |     |    |
| Thymus                     | 127 | 21 |
| Spleen                     | 2   | -  |
| <b>Urinary system</b>      |     |    |
| Kidney                     | 29  | 7  |
| Bladder                    | 2   | -  |
| <b>Reproductive system</b> |     |    |
| Male                       | 23  | 2  |
| Female                     | 3   | 1  |
| <b>Sensory organs</b>      |     |    |
| Ear                        | 12  | 3  |
| Eye                        | 19  | 3  |
| Nose                       | 226 | 33 |
| <b>Endocrine organs</b>    |     |    |
| Thyroid                    | 4   | -  |
| Adrenal gland              | 24  | 7  |
| Pituitary                  | 5   | -  |
