# Supplementary material for: A High-Resolution Anatomical Atlas of the Transcriptome in the Mouse Embryo
Source: PubMed Central journal article supplement (PMC3022534; doi:10.1371/journal.pbio.1000582), 2011-01-18
Supplement: pbio.1000582.s013.pdf [file pbio.1000582.s013.pdf]

| Gene Symbol          | Stage/tissue | Cerebral Cortex | Striatum | Thalamus | Hypothalamus | Midbrain | Cerebellum | Pons | Medulla | Spinal cord |        |
|----------------------|--------------|-----------------|----------|----------|--------------|----------|------------|------|---------|-------------|--------|
| <i>Nradd</i>         | E14.5 embryo |                 |          |          |              |          |            |      | ++      |             | Red    |
|                      | Adult brain  | ++              |          |          |              |          |            |      |         |             |        |
| <i>Lhcgr</i>         | E14.5 embryo |                 |          |          |              |          |            |      | ++      |             | Red    |
|                      | Adult brain  |                 |          |          |              |          |            |      |         |             |        |
| <i>A630033E08Rik</i> | E14.5 embryo |                 |          |          |              |          |            |      | ++      |             | Red    |
|                      | Adult brain  |                 |          |          |              |          |            |      |         |             |        |
| <i>A630052C17Rik</i> | E14.5 embryo |                 |          |          |              |          |            |      | ++      |             | Red    |
|                      | Adult brain  |                 |          |          |              |          |            |      |         |             |        |
| <i>Nkx6.3</i>        | E14.5 embryo |                 |          |          |              |          |            |      | ++      |             | Green  |
|                      | Adult brain  |                 |          |          |              |          |            |      | ++      |             |        |
| <i>Creg2</i>         | E14.5 embryo |                 |          |          |              |          |            |      | ++      |             | Yellow |
|                      | Adult brain  | ++              | ++       | ++       | ++           | ++       | ++         | ++   | ++      | ++          |        |
| <i>Car5b</i>         | E14.5 embryo |                 |          |          |              |          |            |      | ++      |             | Red    |
|                      | Adult brain  |                 |          |          |              |          |            |      |         |             |        |
| <i>2610301K12Rik</i> | E14.5 embryo |                 |          |          |              |          |            |      | +       | +           | Red    |
|                      | Adult brain  |                 |          |          |              |          |            |      |         |             |        |
| <i>Itpr2</i>         | E14.5 embryo |                 |          |          |              |          |            |      | ++      |             | Green  |
|                      | Adult brain  |                 |          |          |              |          |            |      | ++      |             |        |
| <i>Hoxa4</i>         | E14.5 embryo |                 |          |          |              |          |            |      | ++      | ++          | Red    |
|                      | Adult brain  |                 |          |          |              |          |            |      |         |             |        |
| <i>Hoxa6</i>         | E14.5 embryo |                 |          |          |              |          |            |      | ++      | ++          | Red    |
|                      | Adult brain  |                 |          |          |              |          |            |      |         |             |        |
| <i>2210407C18Rik</i> | E14.5 embryo |                 |          |          |              |          |            |      | ++      | ++          | Yellow |
|                      | Adult brain  |                 |          |          |              |          |            |      |         | +           |        |
| <i>Pkd2l1</i>        | E14.5 embryo |                 |          |          |              |          |            |      | +       | ++          | Green  |
|                      | Adult brain  |                 |          |          |              |          |            |      |         | ++          |        |
| <i>Ece2</i>          | E14.5 embryo |                 |          |          |              | +        |            |      | +       | +           | Yellow |
|                      | Adult brain  | +               | +        | +        | +            | +        | +          | +    | +       | +           |        |
| <i>Ghsr</i>          | E14.5 embryo |                 |          |          |              | +        |            |      | +       | ++          | Green  |
|                      | Adult brain  | +               | +        | +        | +            | +        | +          | +    | +       | ++          |        |
| <i>AA407659</i>      | E14.5 embryo |                 |          |          |              | +        |            |      | +       | +           | Red    |
|                      | Adult brain  |                 |          |          |              |          |            |      |         |             |        |
| <i>1700010C24Rik</i> | E14.5 embryo |                 |          |          |              |          |            |      | +       | +           | Green  |
|                      | Adult brain  |                 |          |          |              |          |            |      |         | ++          |        |
| <i>Syt3</i>          | E14.5 embryo |                 |          |          |              |          |            |      |         | +           | Yellow |
|                      | Adult brain  | +               | +        | +        | +            | +        | +          | +    | +       | +           |        |
| <i>Hcn2</i>          | E14.5 embryo |                 |          |          |              |          |            |      |         | ++          | Yellow |
|                      | Adult brain  | +               | +        | +        | +            | +        | +          | +    | +       | +           |        |
| <i>4931429I11Rik</i> | E14.5 embryo |                 |          |          |              |          |            |      |         | ++          | Red    |
|                      | Adult brain  |                 |          |          |              |          |            |      |         |             |        |
| <i>Tmem77</i>        | E14.5 embryo |                 |          |          |              |          |            |      |         | +           | Red    |
|                      | Adult brain  |                 |          |          |              |          |            |      |         |             |        |
| <i>Cabp7</i>         | E14.5 embryo |                 |          |          |              |          |            |      |         | +           | Yellow |
|                      | Adult brain  | +               | +        | +        | +            | +        | ++         | ++   | ++      | ++          |        |
| <i>4930459I23Rik</i> | E14.5 embryo |                 |          |          |              |          |            |      |         | ++          | Yellow |
|                      | Adult brain  | +               | +        | +        | +            | +        | +          | +    | +       | +           |        |
| <i>D030040B21</i>    | E14.5 embryo |                 |          |          |              |          |            |      |         | ++          | Red    |
|                      | Adult brain  | +               | +        | +        | +            | +        | +          | +    | +       |             |        |
| <i>P42pop</i>        | E14.5 embryo |                 |          |          |              | +        |            |      | +       | +           | Yellow |
|                      | Adult brain  | +               | +        | +        | +            | +        | +          | +    | +       | ++          |        |

In the brain regions analyzed signal intensity was scored (+, ++, +++).  
Color code for expression analysis comparison between embryonic and adult stages: equivalent (green), partial equivalence (yellow) and different (red).
