# Supplementary material for: A High-Resolution Anatomical Atlas of the Transcriptome in the Mouse Embryo
Source: PubMed Central journal article supplement (PMC3022534; doi:10.1371/journal.pbio.1000582), 2011-01-18
Supplement: pbio.1000582.s014.pdf [file pbio.1000582.s014.pdf]

| Gene Symbol     | Stage/tissue | Cerebral Cortex | Striatum | Thalamus | Hypothalamus | Midbrain | Cerebellum | Pons | Medulla | Vasculature | Choroid Plexus | Meninges |  |
|-----------------|--------------|-----------------|----------|----------|--------------|----------|------------|------|---------|-------------|----------------|----------|--|
| <i>Slc6a13</i>  | E14.5 embryo |                 |          |          |              |          |            |      |         |             |                | +++      |  |
|                 | Adult brain  |                 |          |          |              |          |            |      |         | +           |                | +++      |  |
| <i>Slc6a15</i>  | E14.5 embryo | +               |          |          |              | +        |            | +    | +       |             | +++            |          |  |
|                 | Adult brain  | +               | +        | +        | +            | +        | +          | +    | +       |             |                |          |  |
| <i>Slc6a17</i>  | E14.5 embryo | +++             | +        | +        | ++           | +++      | +          | ++   | ++      |             |                |          |  |
|                 | Adult brain  | +++             | +++      | +++      | +++          | +++      | +++        | +++  | +++     |             |                |          |  |
| <i>Slc6a20</i>  | E14.5 embryo |                 |          |          |              |          |            |      |         | +           | ++             | +++      |  |
|                 | Adult brain  |                 |          |          |              |          |            |      |         | +           | ++             | +++      |  |
| <i>Slc7a1</i>   | E14.5 embryo |                 |          |          |              |          |            |      |         | +++         |                | +++      |  |
|                 | Adult brain  |                 |          |          |              |          |            |      |         |             |                |          |  |
| <i>Slc7a4</i>   | E14.5 embryo | +               |          | +        | +            | +        | +          | +    | +       |             | +              |          |  |
|                 | Adult brain  | +               | +        | +        | +            | +        | +          | +    | +       |             | ++             |          |  |
| <i>Slc7a10</i>  | E14.5 embryo |                 |          |          |              |          |            |      |         |             | +++            |          |  |
|                 | Adult brain  |                 |          |          |              |          |            |      |         |             | ++             |          |  |
| <i>Slc7a11</i>  | E14.5 embryo |                 |          |          |              |          |            |      |         |             | +++            | +++      |  |
|                 | Adult brain  |                 |          |          |              |          |            |      |         | +++         | +++            | +++      |  |
| <i>Slc8a1</i>   | E14.5 embryo | ++              |          | +        | +            | ++       | +          | ++   | ++      |             |                |          |  |
|                 | Adult brain  | ++              |          | +        | +            | +        | +          | +    | +       |             |                |          |  |
| <i>Slc8a2</i>   | E14.5 embryo | ++              |          |          |              |          |            |      |         |             |                |          |  |
|                 | Adult brain  | +++             | +++      |          |              |          | ++         |      |         |             |                |          |  |
| <i>Slc8a3</i>   | E14.5 embryo | +               |          | +        | +            | +        | +          | +    | +       |             |                |          |  |
|                 | Adult brain  | +               | +        | +        | +            | +        | +          | +    | +       |             |                |          |  |
| <i>Slc9a6</i>   | E14.5 embryo | +               |          | +        | +            | +        | +          | +    | +       |             |                |          |  |
|                 | Adult brain  | ++              | ++       | ++       | ++           | ++       | ++         | ++   | ++      |             |                |          |  |
| <i>Slc10a3</i>  | E14.5 embryo |                 |          |          |              |          |            |      |         |             | ++             |          |  |
|                 | Adult brain  |                 |          |          |              |          |            |      |         |             | ++             | +++      |  |
| <i>Slc10a4</i>  | E14.5 embryo |                 | ++       |          |              | ++       |            | ++   | ++      |             |                |          |  |
|                 | Adult brain  |                 | +++      |          |              | +++      |            | +++  | +++     |             |                |          |  |
| <i>Slc12a2</i>  | E14.5 embryo |                 |          |          |              |          |            |      |         |             | ++             |          |  |
|                 | Adult brain  |                 |          |          |              |          |            |      |         |             | ++             |          |  |
| <i>Slc13a2</i>  | E14.5 embryo | +               |          | +        | +            | ++       | +          | ++   | ++      |             |                |          |  |
|                 | Adult brain  |                 |          |          |              |          |            |      |         |             |                |          |  |
| <i>Slc13a4</i>  | E14.5 embryo |                 |          |          |              |          |            |      |         |             | ++             | +++      |  |
|                 | Adult brain  |                 |          |          |              |          |            |      |         |             | +++            | +++      |  |
| <i>Slc14a1</i>  | E14.5 embryo | +               |          | +        |              | +++      |            | +++  | +++     |             |                |          |  |
|                 | Adult brain  |                 |          |          |              |          |            |      |         |             |                |          |  |
| <i>Slc14a2</i>  | E14.5 embryo | +               |          | ++       |              | ++       |            |      |         |             |                |          |  |
|                 | Adult brain  |                 |          |          |              |          |            |      |         |             |                |          |  |
| <i>Slc15a2</i>  | E14.5 embryo | ++              |          | ++       |              | ++       |            | ++   | ++      |             |                |          |  |
|                 | Adult brain  |                 |          |          |              |          |            |      |         |             |                |          |  |
| <i>Slc16a1</i>  | E14.5 embryo | ++              |          | +        |              | ++       | +          |      |         |             |                |          |  |
|                 | Adult brain  |                 |          |          |              |          |            |      |         |             |                |          |  |
| <i>Slc16a2</i>  | E14.5 embryo | ++              |          |          |              |          |            |      |         |             | +++            |          |  |
|                 | Adult brain  | +++             |          |          |              |          |            |      |         |             | +++            |          |  |
| <i>Slc16a4</i>  | E14.5 embryo |                 |          |          |              |          |            |      |         |             | ++             |          |  |
|                 | Adult brain  |                 |          |          |              |          |            |      |         |             | +              |          |  |
| <i>Slc16a6</i>  | E14.5 embryo |                 |          |          |              |          |            |      |         |             | ++             | ++       |  |
|                 | Adult brain  |                 |          |          |              |          |            |      |         |             | ++             | +        |  |
| <i>Slc16a9</i>  | E14.5 embryo |                 |          |          |              |          |            |      |         |             | ++             | +++      |  |
|                 | Adult brain  |                 |          |          |              |          |            |      |         |             | +++            | +++      |  |
| <i>Slc16a10</i> | E14.5 embryo |                 |          |          |              |          |            |      |         |             | +++            |          |  |
|                 | Adult brain  |                 |          |          |              |          |            |      |         |             | +              | +++      |  |
| <i>Slc16a12</i> | E14.5 embryo |                 |          |          |              |          |            |      |         |             | ++             |          |  |
|                 | Adult brain  |                 |          |          |              |          |            |      |         |             | +              |          |  |
| <i>Slc16a14</i> | E14.5 embryo | +               |          | +        | +            | ++       | +          | +    | +       |             |                |          |  |
|                 | Adult brain  |                 |          |          |              |          |            |      |         |             |                |          |  |
| <i>Slc17a6</i>  | E14.5 embryo | +++             |          | +++      | +++          | +++      |            | +++  | +++     |             |                |          |  |
|                 | Adult brain  | +++             |          | +++      | +++          | +++      |            | +++  | +++     |             |                |          |  |

| Gene Symbol     | Stage/tissue | Cerebral Cortex | Striatum | Thalamus | Hypothalamus | Midbrain | Cerebellum | Pons | Medulla | Vasculature | Choroid Plexus | Meninges |  |
|-----------------|--------------|-----------------|----------|----------|--------------|----------|------------|------|---------|-------------|----------------|----------|--|
| <i>Slc17a8</i>  | E14.5 embryo |                 | +++      | ++       |              | +++      |            | +++  | +++     |             |                |          |  |
|                 | Adult brain  | ++              | +++      | ++       |              | +++      |            | +++  | ++      |             |                |          |  |
| <i>Slc18a2</i>  | E14.5 embryo |                 | +++      | +++      | +++          | +++      |            | +++  | +++     |             |                |          |  |
|                 | Adult brain  |                 |          |          | +++          | +++      |            | +++  |         |             |                |          |  |
| <i>Slc18a3</i>  | E14.5 embryo |                 |          |          |              | +++      |            | +++  | +++     |             |                |          |  |
|                 | Adult brain  |                 | +++      |          |              | +++      |            | +++  | +++     |             |                |          |  |
| <i>Slc20a1</i>  | E14.5 embryo | +++             |          | +        | +            | +        | +          | +    | +       |             |                |          |  |
|                 | Adult brain  | ++              |          | +        | +            | +        | +++        | +    | +       |             |                |          |  |
| <i>Slco1a4</i>  | E14.5 embryo |                 |          |          |              |          |            |      |         |             | ++             |          |  |
|                 | Adult brain  |                 |          |          |              |          |            |      |         | +++         | ++             |          |  |
| <i>Slco1a5</i>  | E14.5 embryo |                 |          |          |              |          |            |      |         |             | ++             |          |  |
|                 | Adult brain  |                 |          |          |              |          |            |      |         |             | +              |          |  |
| <i>Slco1c1</i>  | E14.5 embryo |                 |          |          |              |          |            |      |         | +++         | +++            | ++       |  |
|                 | Adult brain  |                 |          |          |              |          |            |      |         | ++          | +++            |          |  |
| <i>Slco2b1</i>  | E14.5 embryo |                 |          |          |              |          |            |      |         | ++          |                | +        |  |
|                 | Adult brain  |                 |          |          |              |          |            |      |         | +           |                |          |  |
| <i>Slco3a1</i>  | E14.5 embryo | +               |          | +        | +            | +        | +          | +    | +       |             |                |          |  |
|                 | Adult brain  | +               |          | +        | +            | ++       | +          | ++   | ++      |             |                |          |  |
| <i>Slco5a1</i>  | E14.5 embryo | +               | +        | +        | +            | +        | +          | +    | +       |             | +              |          |  |
|                 | Adult brain  | +               | +        | +        | +            | +        | +          | +    | +       |             | +              |          |  |
| <i>Slco1a6</i>  | E14.5 embryo |                 |          |          |              |          |            |      |         |             | +++            |          |  |
|                 | Adult brain  |                 |          |          |              |          |            |      |         |             |                |          |  |
| <i>Slc22a2</i>  | E14.5 embryo |                 |          |          |              |          |            |      |         |             |                | +++      |  |
|                 | Adult brain  |                 |          |          |              |          |            |      |         |             |                | +        |  |
| <i>Slc22a3</i>  | E14.5 embryo |                 |          |          |              |          |            | +++  | +++     |             |                |          |  |
|                 | Adult brain  |                 |          |          |              |          |            | +++  | +++     |             |                |          |  |
| <i>Slc22a4</i>  | E14.5 embryo | ++              | +        | +        | +            | ++       | +          | ++   | ++      |             |                |          |  |
|                 | Adult brain  | +               |          | +        |              | +        | +          |      |         |             |                |          |  |
| <i>Slc22a13</i> | E14.5 embryo | ++              | +        | +        | +            | +        | +          | +    | ++      |             |                |          |  |
|                 | Adult brain  |                 |          |          |              |          |            |      |         |             |                |          |  |
| <i>Slc23a2</i>  | E14.5 embryo |                 |          |          |              |          |            |      |         |             | +++            |          |  |
|                 | Adult brain  |                 |          |          |              |          |            |      |         |             | +++            |          |  |
| <i>Slc24a3</i>  | E14.5 embryo |                 |          | ++       | ++           | ++       |            | ++   | ++      |             |                |          |  |
|                 | Adult brain  | ++              |          | ++       | ++           | ++       |            | ++   | ++      |             |                |          |  |
| <i>Slc25a1</i>  | E14.5 embryo |                 |          |          |              |          |            | ++   | ++      |             |                |          |  |
|                 | Adult brain  |                 | +++      |          |              |          |            | +++  | +++     |             |                |          |  |
| <i>Slc25a13</i> | E14.5 embryo | +               |          |          |              | +        |            |      |         |             | +              |          |  |
|                 | Adult brain  |                 |          |          |              |          |            |      |         |             | ++             |          |  |
| <i>Slc25a22</i> | E14.5 embryo | +               |          | +        | +            | +        | +          | +    | +       |             |                |          |  |
|                 | Adult brain  | +               |          | +        | +            | +        | +          | +    | +       |             |                |          |  |
| <i>Slc25a27</i> | E14.5 embryo | +               | +        | +        | +            | +        | +          | +    | +       |             |                |          |  |
|                 | Adult brain  | ++              | ++       | ++       | ++           | ++       | ++         | ++   | ++      |             |                |          |  |
| <i>Slc26a7</i>  | E14.5 embryo |                 |          | +        |              | ++       |            | +    |         |             |                |          |  |
|                 | Adult brain  |                 |          |          |              |          |            |      |         |             |                | +        |  |
| <i>Slc27a1</i>  | E14.5 embryo | ++              |          | ++       | +++          | +++      | ++         | +++  | +++     |             | +              |          |  |
|                 | Adult brain  | +++             | +++      | +++      | +++          | +++      | +++        | +++  | +++     |             | +++            | +++      |  |
| <i>Slc30a1</i>  | E14.5 embryo |                 |          |          |              |          |            |      |         | ++          |                | +        |  |
|                 | Adult brain  |                 |          |          |              |          |            |      |         |             |                |          |  |
| <i>Slc30a3</i>  | E14.5 embryo |                 |          | +++      | +++          | +++      | +++        | +++  | +++     |             |                |          |  |
|                 | Adult brain  | +++             |          | ++       |              | ++       | ++         | ++   | ++      |             |                |          |  |
| <i>Slc31a1</i>  | E14.5 embryo | +               |          |          |              |          |            |      |         | ++          | +++            |          |  |
|                 | Adult brain  |                 |          |          |              |          |            |      |         |             | ++             |          |  |
| <i>Slc32a1</i>  | E14.5 embryo | ++              | +++      | +++      | +++          | +++      | +++        | +++  | +++     |             |                |          |  |
|                 | Adult brain  | +++             | +++      | +++      | +++          | +++      | +++        | +++  | +++     |             |                |          |  |
| <i>Slc35f1</i>  | E14.5 embryo | ++              |          | ++       | +            | ++       | +++        | ++   | ++      |             |                |          |  |
|                 | Adult brain  | +               | +        | ++       | +            | +        | +++        | +    | +       |             |                |          |  |
| <i>Slc35f2</i>  | E14.5 embryo | ++              |          |          |              |          |            | ++   | ++      | +           |                | +        |  |
|                 | Adult brain  |                 |          |          |              |          |            | ++   | ++      |             |                |          |  |

| Gene Symbol     | Stage/tissue | Cerebral Cortex | Striatum | Thalamus | Hypothalamus | Midbrain | Cerebellum | Pons | Medulla | Vasculature | Choroid Plexus | Meninges |        |
|-----------------|--------------|-----------------|----------|----------|--------------|----------|------------|------|---------|-------------|----------------|----------|--------|
| <i>Slc36a1</i>  | E14.5 embryo |                 |          |          |              | +        | ++         | ++   | ++      |             |                |          | Yellow |
|                 | Adult brain  | +++             | +++      | +++      |              | +++      | +++        | +++  | +++     |             |                |          | Yellow |
| <i>Slc38a1</i>  | E14.5 embryo | ++              |          | ++       | ++           | ++       | ++         | ++   | ++      |             |                |          | Yellow |
|                 | Adult brain  | ++              |          | ++       | ++           | ++       | +          | ++   | ++      |             |                |          | Yellow |
| <i>Slc38a2</i>  | E14.5 embryo |                 |          |          |              |          |            |      |         | +++         |                | +++      | Yellow |
|                 | Adult brain  |                 |          |          |              |          |            |      |         |             |                | +++      | Yellow |
| <i>Slc38a3</i>  | E14.5 embryo |                 |          |          |              |          |            |      |         | +++         | ++             | ++       | Green  |
|                 | Adult brain  |                 |          |          |              |          |            |      |         | ++          | +++            | +++      | Green  |
| <i>Slc38a5</i>  | E14.5 embryo |                 |          |          |              |          |            |      |         | +++         |                | +++      | Yellow |
|                 | Adult brain  |                 |          |          |              |          |            |      |         | ++          |                |          | Yellow |
| <i>Slc39a3</i>  | E14.5 embryo | ++              | ++       | ++       | ++           | ++       | ++         | ++   | ++      |             |                |          | Green  |
|                 | Adult brain  | +               | +        | +        | +            | +        | +          | +    | +       |             |                |          | Green  |
| <i>Slc39a8</i>  | E14.5 embryo |                 |          |          |              |          |            |      |         | +++         | +              | +++      | Red    |
|                 | Adult brain  |                 |          |          |              |          |            |      |         |             |                |          | Red    |
| <i>Slc39a10</i> | E14.5 embryo |                 |          |          |              |          |            |      |         | ++          |                | ++       | Red    |
|                 | Adult brain  | ++              |          |          |              |          |            |      |         |             |                |          | Red    |
| <i>Slc39a12</i> | E14.5 embryo |                 |          |          |              |          |            |      |         |             | +++            |          | Green  |
|                 | Adult brain  |                 |          |          |              |          |            |      |         |             | ++             |          | Green  |
| <i>Slc40a1</i>  | E14.5 embryo |                 |          |          |              |          |            |      |         | +++         | ++             | +++      | Red    |
|                 | Adult brain  |                 |          |          |              |          |            |      |         |             | +              |          | Red    |
| <i>Slc41a1</i>  | E14.5 embryo |                 |          |          |              |          |            |      |         |             |                | ++       | Green  |
|                 | Adult brain  |                 |          |          |              |          |            |      |         |             | ++             | +++      | Green  |
| <i>Slc43a2</i>  | E14.5 embryo | +               |          | +        | +            | +        | +          | +    | +       | ++          |                | +        | Yellow |
|                 | Adult brain  | +               | +        | +        | +            | +        | +          | +    | +       |             |                |          | Yellow |
| <i>Slc44a5</i>  | E14.5 embryo | +               |          | ++       |              | ++       | ++         | +++  | +       |             |                |          | Red    |
|                 | Adult brain  |                 |          |          |              |          |            |      |         |             |                |          | Red    |
| <i>Slc45a3</i>  | E14.5 embryo | +               | +        | +++      |              | +++      |            |      |         |             |                |          | Red    |
|                 | Adult brain  |                 |          |          |              | +        |            | +    | +       |             |                |          | Red    |
| <i>Slc47a1</i>  | E14.5 embryo |                 |          |          |              |          |            |      |         |             |                | ++       | Green  |
|                 | Adult brain  |                 |          |          |              |          |            |      |         |             |                | +++      | Green  |

In the brain regions analyzed signal intensity was scored (+, ++, +++).

Color code for Slc gene expression analysis comparison: equivalent (green), partial equivalence (yellow) and different (red).
