# Supplementary material for: A High-Resolution Anatomical Atlas of the Transcriptome in the Mouse Embryo
Source: PubMed Central journal article supplement (PMC3022534; doi:10.1371/journal.pbio.1000582), 2011-01-18
Supplement: pbio.1000582.s015.pdf [file pbio.1000582.s015.pdf]

Table S7. List of murine homologs of human disease genes whose tissue distribution at E14.5 is consistent with the corresponding disease phenotype.

| Human disease                                           | OMIM # | Endocrine | Genitourinary | Cardiovascular | CNS | Eye | Ear | Nose | Skeletal muscle | Skeleton | Gastrointestinal | Liver | Respiratory | Skin | Teeth | Limbs | Immune system | gene symbol (mouse ortholog) |
|---------------------------------------------------------|--------|-----------|---------------|----------------|-----|-----|-----|------|-----------------|----------|------------------|-------|-------------|------|-------|-------|---------------|------------------------------|
| AHC                                                     | 300200 |           |               |                |     |     |     |      |                 |          |                  |       |             |      |       |       |               | <i>Nr0b1</i>                 |
| ALGS1                                                   | 118450 |           |               |                |     |     |     |      |                 |          |                  |       |             |      |       |       |               | <i>Jaq1</i>                  |
| HPE9                                                    | 610829 |           |               |                |     |     |     |      |                 |          |                  |       |             |      |       |       |               | <i>Gli2</i>                  |
| KNOBLOCH SYNDROME, TYPE I                               | 267750 |           |               |                |     |     |     |      |                 |          |                  |       |             |      |       |       |               | <i>Col18a1</i>               |
| MEB                                                     | 253280 |           |               |                |     |     |     |      |                 |          |                  |       |             |      |       |       |               | <i>Pomgnt1</i>               |
| BFPP                                                    | 606854 |           |               |                |     |     |     |      |                 |          |                  |       |             |      |       |       |               | <i>Gpr56</i>                 |
| CHARGE                                                  | 214800 |           |               |                |     |     |     |      |                 |          |                  |       |             |      |       |       |               | <i>Chd7</i>                  |
| OSX                                                     | 300000 |           |               |                |     |     |     |      |                 |          |                  |       |             |      |       |       |               | <i>Mid1</i>                  |
| HPE4                                                    | 142946 |           |               |                |     |     |     |      |                 |          |                  |       |             |      |       |       |               | <i>Tqif</i>                  |
| NALD                                                    | 202370 |           |               |                |     |     |     |      |                 |          |                  |       |             |      |       |       |               | <i>Pex5</i>                  |
| MENTAL RETARDATION, X-LINKED                            | 300419 |           |               |                |     |     |     |      |                 |          |                  |       |             |      |       |       |               | <i>Arx</i>                   |
| DFNB22                                                  | 607039 |           |               |                |     |     |     |      |                 |          |                  |       |             |      |       |       |               | <i>Otoa</i>                  |
| DFNA12                                                  | 601543 |           |               |                |     |     |     |      |                 |          |                  |       |             |      |       |       |               | <i>Tecta</i>                 |
| CCZ5                                                    | 600881 |           |               |                |     |     |     |      |                 |          |                  |       |             |      |       |       |               | <i>Cryba1</i>                |
| RP, LCA                                                 | 268000 |           |               |                |     |     |     |      |                 |          |                  |       |             |      |       |       |               | <i>Crx</i>                   |
| MULTIPLE PTERYGIUM SYNDROME                             | 265000 |           |               |                |     |     |     |      |                 |          |                  |       |             |      |       |       |               | <i>Chrnq</i>                 |
| MCOP3                                                   | 611038 |           |               |                |     |     |     |      |                 |          |                  |       |             |      |       |       |               | <i>Rax</i>                   |
| MCOP59                                                  | 601186 |           |               |                |     |     |     |      |                 |          |                  |       |             |      |       |       |               | <i>Stra6</i>                 |
| MAC and related disorders                               | 610125 |           |               |                |     |     |     |      |                 |          |                  |       |             |      |       |       |               | <i>Otx2</i>                  |
| MCOP56                                                  | 607932 |           |               |                |     |     |     |      |                 |          |                  |       |             |      |       |       |               | <i>Bmp4</i>                  |
| FRASER SYNDROME                                         | 219000 |           |               |                |     |     |     |      |                 |          |                  |       |             |      |       |       |               | <i>Fras1</i>                 |
| FRASER SYNDROME                                         | 219000 |           |               |                |     |     |     |      |                 |          |                  |       |             |      |       |       |               | <i>Frem2</i>                 |
| RENAL ADYSPLASIA                                        | 191830 |           |               |                |     |     |     |      |                 |          |                  |       |             |      |       |       |               | <i>Upk3a</i>                 |
| PPS                                                     | 119500 |           |               |                |     |     |     |      |                 |          |                  |       |             |      |       |       |               | <i>Irf6</i>                  |
| ACG2                                                    | 200610 |           |               |                |     |     |     |      |                 |          |                  |       |             |      |       |       |               | <i>Col2a1</i>                |
| ACG1B                                                   | 600972 |           |               |                |     |     |     |      |                 |          |                  |       |             |      |       |       |               | <i>Slc26a2</i>               |
| WS1                                                     | 193500 |           |               |                |     |     |     |      |                 |          |                  |       |             |      |       |       |               | <i>Pax3</i>                  |
| STL2                                                    | 604841 |           |               |                |     |     |     |      |                 |          |                  |       |             |      |       |       |               | <i>Col11a1</i>               |
| ECTODERMAL DYSPLASIA, ANHIDROTIC                        | 612132 |           |               |                |     |     |     |      |                 |          |                  |       |             |      |       |       |               | <i>Nfkb1a</i>                |
| SGS1                                                    | 312870 |           |               |                |     |     |     |      |                 |          |                  |       |             |      |       |       |               | <i>Gpc3</i>                  |
| ATS                                                     | 301050 |           |               |                |     |     |     |      |                 |          |                  |       |             |      |       |       |               | <i>Col4a5</i>                |
| SPD1                                                    | 186000 |           |               |                |     |     |     |      |                 |          |                  |       |             |      |       |       |               | <i>Hoxd13</i>                |
| HAND-FOOT-UTERUS SYNDROME                               | 140000 |           |               |                |     |     |     |      |                 |          |                  |       |             |      |       |       |               | <i>Hoxa13</i>                |
| CMH7                                                    | 192600 |           |               |                |     |     |     |      |                 |          |                  |       |             |      |       |       |               | <i>Tnni3</i>                 |
| CMH10                                                   | 608758 |           |               |                |     |     |     |      |                 |          |                  |       |             |      |       |       |               | <i>Myl2</i>                  |
| CMH12                                                   | 612124 |           |               |                |     |     |     |      |                 |          |                  |       |             |      |       |       |               | <i>Csrp3</i>                 |
| ASD4                                                    | 611363 |           |               |                |     |     |     |      |                 |          |                  |       |             |      |       |       |               | <i>Tbx20</i>                 |
| ASD2                                                    | 607941 |           |               |                |     |     |     |      |                 |          |                  |       |             |      |       |       |               | <i>Gata4</i>                 |
| EDMD2                                                   | 181350 |           |               |                |     |     |     |      |                 |          |                  |       |             |      |       |       |               | <i>Lmna</i>                  |
| CMH2                                                    | 115195 |           |               |                |     |     |     |      |                 |          |                  |       |             |      |       |       |               | <i>Tnni2</i>                 |
| CMH9                                                    | 192600 |           |               |                |     |     |     |      |                 |          |                  |       |             |      |       |       |               | <i>Myl3</i>                  |
| CMH8                                                    | 608751 |           |               |                |     |     |     |      |                 |          |                  |       |             |      |       |       |               | <i>Ttn</i>                   |
| ASD3                                                    | 108800 |           |               |                |     |     |     |      |                 |          |                  |       |             |      |       |       |               | <i>Myh6</i>                  |
| AMDH, BDC                                               | 201250 |           |               |                |     |     |     |      |                 |          |                  |       |             |      |       |       |               | <i>Gdf5</i>                  |
| TBS                                                     | 107480 |           |               |                |     |     |     |      |                 |          |                  |       |             |      |       |       |               | <i>Sall1</i>                 |
| AOI                                                     | 108720 |           |               |                |     |     |     |      |                 |          |                  |       |             |      |       |       |               | <i>Flnb</i>                  |
| FACIOGENITAL DYSPLASIA                                  | 305400 |           |               |                |     |     |     |      |                 |          |                  |       |             |      |       |       |               | <i>FGD1</i>                  |
| CHONDRODYSPLASIA, BLOMSTRAND TYPE; BOCD                 | 215045 |           |               |                |     |     |     |      |                 |          |                  |       |             |      |       |       |               | <i>Pthr1</i>                 |
| DA2B                                                    | 601680 |           |               |                |     |     |     |      |                 |          |                  |       |             |      |       |       |               | <i>Tnni3</i>                 |
| DA2B                                                    | 601680 |           |               |                |     |     |     |      |                 |          |                  |       |             |      |       |       |               | <i>Tnni2</i>                 |
| CMPD                                                    | 114290 |           |               |                |     |     |     |      |                 |          |                  |       |             |      |       |       |               | <i>Sox9</i>                  |
| AMDM                                                    | 602875 |           |               |                |     |     |     |      |                 |          |                  |       |             |      |       |       |               | <i>Npr2</i>                  |
| UMS                                                     | 181450 |           |               |                |     |     |     |      |                 |          |                  |       |             |      |       |       |               | <i>Tbx3</i>                  |
| PTHSL1                                                  | 610042 |           |               |                |     |     |     |      |                 |          |                  |       |             |      |       |       |               | <i>Cntnap2</i>               |
| HPE3                                                    | 142945 |           |               |                |     |     |     |      |                 |          |                  |       |             |      |       |       |               | <i>Shh</i>                   |
| HPE2                                                    | 157170 |           |               |                |     |     |     |      |                 |          |                  |       |             |      |       |       |               | <i>Six3</i>                  |
| Aniridia and related disorders                          | 106210 |           |               |                |     |     |     |      |                 |          |                  |       |             |      |       |       |               | <i>Pax6</i>                  |
| MCOPCB3                                                 | 610092 |           |               |                |     |     |     |      |                 |          |                  |       |             |      |       |       |               | <i>Chx10</i>                 |
| CCA2                                                    | 601547 |           |               |                |     |     |     |      |                 |          |                  |       |             |      |       |       |               | <i>Crybb2</i>                |
| CATARACT, CONGENITAL, CERULEAN TYPE, 3; CCA3            | 608983 |           |               |                |     |     |     |      |                 |          |                  |       |             |      |       |       |               | <i>Cryaa</i>                 |
| RIE1                                                    | 180500 |           |               |                |     |     |     |      |                 |          |                  |       |             |      |       |       |               | <i>Pitx2</i>                 |
| A14, TDO                                                | 104510 |           |               |                |     |     |     |      |                 |          |                  |       |             |      |       |       |               | <i>Dlx3</i>                  |
| EXT1                                                    | 133700 |           |               |                |     |     |     |      |                 |          |                  |       |             |      |       |       |               | <i>EXT1</i>                  |
| BDA1, ACFD                                              | 112500 |           |               |                |     |     |     |      |                 |          |                  |       |             |      |       |       |               | <i>Ihh</i>                   |
| BCNS                                                    | 109400 |           |               |                |     |     |     |      |                 |          |                  |       |             |      |       |       |               | <i>Ptch1</i>                 |
| FEINGOLD SYNDROME                                       | 164280 |           |               |                |     |     |     |      |                 |          |                  |       |             |      |       |       |               | <i>Mycn</i>                  |
| ACLS                                                    | 200990 |           |               |                |     |     |     |      |                 |          |                  |       |             |      |       |       |               | <i>vera</i>                  |
| CFNS                                                    | 304110 |           |               |                |     |     |     |      |                 |          |                  |       |             |      |       |       |               | <i>Efnb1</i>                 |
| ACTH deficiency                                         | 201400 |           |               |                |     |     |     |      |                 |          |                  |       |             |      |       |       |               | <i>Tbx19</i>                 |
| FADS                                                    | 208150 |           |               |                |     |     |     |      |                 |          |                  |       |             |      |       |       |               | <i>Rapsn</i>                 |
| DPD1                                                    | 131300 |           |               |                |     |     |     |      |                 |          |                  |       |             |      |       |       |               | <i>Tqfb1</i>                 |
| SPONDYLOEPIPHYSEAL DYSPLASIA                            | 602111 |           |               |                |     |     |     |      |                 |          |                  |       |             |      |       |       |               | <i>Mmp13</i>                 |
| EDM2                                                    | 600204 |           |               |                |     |     |     |      |                 |          |                  |       |             |      |       |       |               | <i>Col9a2</i>                |
| SPONDYLOEPIPHYSEAL DYSPLASIA, KIMBERLEY TYPE            | 608361 |           |               |                |     |     |     |      |                 |          |                  |       |             |      |       |       |               | <i>Aqc1</i>                  |
| SPONDYLOEPIPHYSEAL DYSPLASIA, PAKISTANI TYPE            | 612847 |           |               |                |     |     |     |      |                 |          |                  |       |             |      |       |       |               | <i>Paps2</i>                 |
| MCDS                                                    | 156500 |           |               |                |     |     |     |      |                 |          |                  |       |             |      |       |       |               | <i>Col10a1</i>               |
| BRACHYOLMIA TYPE 3                                      | 113500 |           |               |                |     |     |     |      |                 |          |                  |       |             |      |       |       |               | <i>Trpv4</i>                 |
| EDM1                                                    | 132400 |           |               |                |     |     |     |      |                 |          |                  |       |             |      |       |       |               | <i>Col9a1</i>                |
| EDM5                                                    | 607078 |           |               |                |     |     |     |      |                 |          |                  |       |             |      |       |       |               | <i>Matn3</i>                 |
| EDM3                                                    | 600969 |           |               |                |     |     |     |      |                 |          |                  |       |             |      |       |       |               | <i>Col9a3</i>                |
| SEMDC                                                   | 184250 |           |               |                |     |     |     |      |                 |          |                  |       |             |      |       |       |               | <i>Col2a1</i>                |
| SVNS1                                                   | 186500 |           |               |                |     |     |     |      |                 |          |                  |       |             |      |       |       |               | <i>Noq</i>                   |
| CACP                                                    | 208250 |           |               |                |     |     |     |      |                 |          |                  |       |             |      |       |       |               | <i>Prq4</i>                  |
| ARCL1                                                   | 219100 |           |               |                |     |     |     |      |                 |          |                  |       |             |      |       |       |               | <i>Fbln5</i>                 |
| BSS                                                     | 605041 |           |               |                |     |     |     |      |                 |          |                  |       |             |      |       |       |               | <i>Cyld</i>                  |
| HEB                                                     | 129490 |           |               |                |     |     |     |      |                 |          |                  |       |             |      |       |       |               | <i>Edaradd</i>               |
| EPIDERMOLYSIS BULLOSA JUNCTIONALIS WITH PYLORIC ATRESIA | 226730 |           |               |                |     |     |     |      |                 |          |                  |       |             |      |       |       |               | <i>Itqb4</i>                 |
| EPIDERMOLYSIS BULLOSA JUNCTIONALIS WITH PYLORIC ATRESIA | 226730 |           |               |                |     |     |     |      |                 |          |                  |       |             |      |       |       |               | <i>Itqa6</i>                 |
| HEB                                                     | 129490 |           |               |                |     |     |     |      |                 |          |                  |       |             |      |       |       |               | <i>Edar</i>                  |
| ALPS2B                                                  | 607271 |           |               |                |     |     |     |      |                 |          |                  |       |             |      |       |       |               | <i>Casp8</i>                 |
| BLS, TYPE I                                             | 604571 |           |               |                |     |     |     |      |                 |          |                  |       |             |      |       |       |               | <i>Tap2</i>                  |
| SCID, AUTOSOMAL RECESSIVE                               | 608971 |           |               |                |     |     |     |      |                 |          |                  |       |             |      |       |       |               | <i>Cd3d</i>                  |
| SCID, AUTOSOMAL RECESSIVE                               | 608971 |           |               |                |     |     |     |      |                 |          |                  |       |             |      |       |       |               | <i>Cd3e</i>                  |
| CGD, AUTOSOMAL RECESSIVE CYTOCHROME b-POSITIVE, TYPE II | 233710 |           |               |                |     |     |     |      |                 |          |                  |       |             |      |       |       |               | <i>Ncf2</i>                  |
| THYROID HORMONOGENESIS, GENETIC DEFECT IN, 4            | 274800 |           |               |                |     |     |     |      |                 |          |                  |       |             |      |       |       |               | <i>Iyd (0610009A07Rik)</i>   |
| CHNG2                                                   | 218700 |           |               |                |     |     |     |      |                 |          |                  |       |             |      |       |       |               | <i>Pax8</i>                  |
| ADT1P                                                   | 175780 |           |               |                |     |     |     |      |                 |          |                  |       |             |      |       |       |               | <i>Col4a1</i>                |
| DFNX2                                                   | 304400 |           |               |                |     |     |     |      |                 |          |                  |       |             |      |       |       |               | <i>Pou3f4</i>                |
| MCOP55                                                  | 610125 |           |               |                |     |     |     |      |                 |          |                  |       |             |      |       |       |               | <i>Otx2</i>                  |
| PAPILLORENA SYNDROME                                    | 120330 |           |               |                |     |     |     |      |                 |          |                  |       |             |      |       |       |               | <i>Pax2</i>                  |

Rows: selected human genetic diseases and corresponding responsible genes (mouse orthologs). Columns: tissues affected in the listed diseases, as assessed from OMIM analysis. Green cell, the gene is annotated to be expressed in the affected tissue; red cell, the gene is not annotated to be expressed in the affected tissue.
