# Supplementary material for: A High-Resolution Anatomical Atlas of the Transcriptome in the Mouse Embryo
Source: PubMed Central journal article supplement (PMC3022534; doi:10.1371/journal.pbio.1000582), 2011-01-18
Supplement: pbio.1000582.s016.pdf [file pbio.1000582.s016.pdf]

| Group | Gene Symbol | EUReXpress Link                 | Neocortex | Hippocampus | Corpus Striatum | Septum | Thalamus | Hypothalamus | Pretectum | Superior Colliculu | Inferior Colliculus | Tegmentum | Cerebellum | SpinalCord | Skin | Lung | Kidney | Liver | Thyroid | Pituitary | Pancreas | Adrenal Gland | Heart | Thymus | Muscle System | Axial Skeleton |  |
|-------|-------------|---------------------------------|-----------|-------------|-----------------|--------|----------|--------------|-----------|--------------------|---------------------|-----------|------------|------------|------|------|--------|-------|---------|-----------|----------|---------------|-------|--------|---------------|----------------|--|
|       | Tcf3        | <a href="#">euxassay_018176</a> |           |             |                 |        |          |              |           |                    |                     |           |            |            |      |      |        |       |         |           |          |               |       |        |               |                |  |
|       | Tcf4        | <a href="#">euxassay_018303</a> |           |             |                 |        |          |              |           |                    |                     |           |            |            |      |      |        |       |         |           |          |               |       |        |               |                |  |
|       | Tcf7        | <a href="#">euxassay_018177</a> |           |             |                 |        |          |              |           |                    |                     |           |            |            |      |      |        |       |         |           |          |               |       |        |               |                |  |

Wnt Ca2+ signaling

|  |        |                                 |  |  |  |  |  |  |  |  |  |  |  |  |  |  |  |  |  |  |  |  |  |  |  |  |  |
|--|--------|---------------------------------|--|--|--|--|--|--|--|--|--|--|--|--|--|--|--|--|--|--|--|--|--|--|--|--|--|
|  | Nfatc1 | <a href="#">euxassay_002607</a> |  |  |  |  |  |  |  |  |  |  |  |  |  |  |  |  |  |  |  |  |  |  |  |  |  |
|  | Nfatc2 | <a href="#">euxassay_013856</a> |  |  |  |  |  |  |  |  |  |  |  |  |  |  |  |  |  |  |  |  |  |  |  |  |  |
|  | Nfatc3 | <a href="#">euxassay_008958</a> |  |  |  |  |  |  |  |  |  |  |  |  |  |  |  |  |  |  |  |  |  |  |  |  |  |
|  | Nfatc4 | <a href="#">euxassay_003488</a> |  |  |  |  |  |  |  |  |  |  |  |  |  |  |  |  |  |  |  |  |  |  |  |  |  |
|  | Nfat5  | <a href="#">euxassay_019784</a> |  |  |  |  |  |  |  |  |  |  |  |  |  |  |  |  |  |  |  |  |  |  |  |  |  |
|  | Plcd1  | <a href="#">euxassay_018598</a> |  |  |  |  |  |  |  |  |  |  |  |  |  |  |  |  |  |  |  |  |  |  |  |  |  |
|  | Plcg1  | <a href="#">euxassay_018782</a> |  |  |  |  |  |  |  |  |  |  |  |  |  |  |  |  |  |  |  |  |  |  |  |  |  |
|  | Ppp3ca | <a href="#">euxassay_002802</a> |  |  |  |  |  |  |  |  |  |  |  |  |  |  |  |  |  |  |  |  |  |  |  |  |  |
|  | Ppp3r2 | <a href="#">euxassay_019785</a> |  |  |  |  |  |  |  |  |  |  |  |  |  |  |  |  |  |  |  |  |  |  |  |  |  |

Wnt PCP signaling

|  |            |                                 |  |  |  |  |  |  |  |  |  |  |  |  |  |  |  |  |  |  |  |  |  |  |  |  |  |
|--|------------|---------------------------------|--|--|--|--|--|--|--|--|--|--|--|--|--|--|--|--|--|--|--|--|--|--|--|--|--|
|  | Cdc42      | <a href="#">euxassay_000136</a> |  |  |  |  |  |  |  |  |  |  |  |  |  |  |  |  |  |  |  |  |  |  |  |  |  |
|  | D10Ert610e | <a href="#">euxassay_019769</a> |  |  |  |  |  |  |  |  |  |  |  |  |  |  |  |  |  |  |  |  |  |  |  |  |  |
|  | Daam1      | <a href="#">euxassay_019770</a> |  |  |  |  |  |  |  |  |  |  |  |  |  |  |  |  |  |  |  |  |  |  |  |  |  |
|  | Daam2      | <a href="#">euxassay_019771</a> |  |  |  |  |  |  |  |  |  |  |  |  |  |  |  |  |  |  |  |  |  |  |  |  |  |
|  | Mapk8      | <a href="#">euxassay_018521</a> |  |  |  |  |  |  |  |  |  |  |  |  |  |  |  |  |  |  |  |  |  |  |  |  |  |
|  | Mapk9      | <a href="#">euxassay_019788</a> |  |  |  |  |  |  |  |  |  |  |  |  |  |  |  |  |  |  |  |  |  |  |  |  |  |
|  | Mapk10     | <a href="#">euxassay_019772</a> |  |  |  |  |  |  |  |  |  |  |  |  |  |  |  |  |  |  |  |  |  |  |  |  |  |
|  | RhoA       | <a href="#">euxassay_019777</a> |  |  |  |  |  |  |  |  |  |  |  |  |  |  |  |  |  |  |  |  |  |  |  |  |  |
|  | Rock2      | <a href="#">euxassay_014233</a> |  |  |  |  |  |  |  |  |  |  |  |  |  |  |  |  |  |  |  |  |  |  |  |  |  |
|  | Ror2       | <a href="#">euxassay_018175</a> |  |  |  |  |  |  |  |  |  |  |  |  |  |  |  |  |  |  |  |  |  |  |  |  |  |

Wnt GO:0016055

|  |          |                                 |  |  |  |  |  |  |  |  |  |  |  |  |  |  |  |  |  |  |  |  |  |  |  |  |  |
|--|----------|---------------------------------|--|--|--|--|--|--|--|--|--|--|--|--|--|--|--|--|--|--|--|--|--|--|--|--|--|
|  | Aes      | <a href="#">euxassay_019767</a> |  |  |  |  |  |  |  |  |  |  |  |  |  |  |  |  |  |  |  |  |  |  |  |  |  |
|  | Camta1   | <a href="#">euxassay_011844</a> |  |  |  |  |  |  |  |  |  |  |  |  |  |  |  |  |  |  |  |  |  |  |  |  |  |
|  | Camta2   | <a href="#">euxassay_008596</a> |  |  |  |  |  |  |  |  |  |  |  |  |  |  |  |  |  |  |  |  |  |  |  |  |  |
|  | Csnk1d   | <a href="#">euxassay_019773</a> |  |  |  |  |  |  |  |  |  |  |  |  |  |  |  |  |  |  |  |  |  |  |  |  |  |
|  | Csnk1e   | <a href="#">euxassay_006631</a> |  |  |  |  |  |  |  |  |  |  |  |  |  |  |  |  |  |  |  |  |  |  |  |  |  |
|  | Csnk1g1  | <a href="#">euxassay_019774</a> |  |  |  |  |  |  |  |  |  |  |  |  |  |  |  |  |  |  |  |  |  |  |  |  |  |
|  | Csnk1g2  | <a href="#">euxassay_019775</a> |  |  |  |  |  |  |  |  |  |  |  |  |  |  |  |  |  |  |  |  |  |  |  |  |  |
|  | Csnk2a1  | <a href="#">euxassay_018819</a> |  |  |  |  |  |  |  |  |  |  |  |  |  |  |  |  |  |  |  |  |  |  |  |  |  |
|  | Csnk2a2  | <a href="#">euxassay_018707</a> |  |  |  |  |  |  |  |  |  |  |  |  |  |  |  |  |  |  |  |  |  |  |  |  |  |
|  | Csnk2b   | <a href="#">euxassay_003470</a> |  |  |  |  |  |  |  |  |  |  |  |  |  |  |  |  |  |  |  |  |  |  |  |  |  |
|  | Ctnnbip1 | <a href="#">euxassay_007108</a> |  |  |  |  |  |  |  |  |  |  |  |  |  |  |  |  |  |  |  |  |  |  |  |  |  |
|  | Ctnnd1   | <a href="#">euxassay_019781</a> |  |  |  |  |  |  |  |  |  |  |  |  |  |  |  |  |  |  |  |  |  |  |  |  |  |
|  | CxxC4    | <a href="#">euxassay_008607</a> |  |  |  |  |  |  |  |  |  |  |  |  |  |  |  |  |  |  |  |  |  |  |  |  |  |
|  | Dact1    | <a href="#">euxassay_009577</a> |  |  |  |  |  |  |  |  |  |  |  |  |  |  |  |  |  |  |  |  |  |  |  |  |  |
|  | Fbxw4    | <a href="#">euxassay_003165</a> |  |  |  |  |  |  |  |  |  |  |  |  |  |  |  |  |  |  |  |  |  |  |  |  |  |
|  | Hbp1     | <a href="#">euxassay_018713</a> |  |  |  |  |  |  |  |  |  |  |  |  |  |  |  |  |  |  |  |  |  |  |  |  |  |
|  | Invs     | <a href="#">euxassay_019786</a> |  |  |  |  |  |  |  |  |  |  |  |  |  |  |  |  |  |  |  |  |  |  |  |  |  |
|  | Ldb1     | <a href="#">euxassay_006506</a> |  |  |  |  |  |  |  |  |  |  |  |  |  |  |  |  |  |  |  |  |  |  |  |  |  |
|  | Mitf     | <a href="#">euxassay_019482</a> |  |  |  |  |  |  |  |  |  |  |  |  |  |  |  |  |  |  |  |  |  |  |  |  |  |
|  | Pitx2    | <a href="#">euxassay_019470</a> |  |  |  |  |  |  |  |  |  |  |  |  |  |  |  |  |  |  |  |  |  |  |  |  |  |
|  | Slc9a3r1 | <a href="#">euxassay_019782</a> |  |  |  |  |  |  |  |  |  |  |  |  |  |  |  |  |  |  |  |  |  |  |  |  |  |
|  | Sostdc1  | <a href="#">euxassay_019780</a> |  |  |  |  |  |  |  |  |  |  |  |  |  |  |  |  |  |  |  |  |  |  |  |  |  |
|  | Tle4     | <a href="#">euxassay_018870</a> |  |  |  |  |  |  |  |  |  |  |  |  |  |  |  |  |  |  |  |  |  |  |  |  |  |
|  | Tle6     | <a href="#">euxassay_018871</a> |  |  |  |  |  |  |  |  |  |  |  |  |  |  |  |  |  |  |  |  |  |  |  |  |  |
|  | Wisp1    | <a href="#">euxassay_006558</a> |  |  |  |  |  |  |  |  |  |  |  |  |  |  |  |  |  |  |  |  |  |  |  |  |  |
|  | Zbtb33   | <a href="#">euxassay_019778</a> |  |  |  |  |  |  |  |  |  |  |  |  |  |  |  |  |  |  |  |  |  |  |  |  |  |

not detected
  weak
  medium
  strong

Note: The Wnt-signaling components are grouped into blocks for ligands, receptors, extracellular inhibitors, canonical-, Ca2+, and PCP signaling, and additional genes annotated with the GO term "GO:0016055; Wnt receptor signaling pathway". The table provides direct access to the ISH data of the full embryo via the linked EUReXpress Assay ID.
