# Supplementary material for: A High-Resolution Anatomical Atlas of the Transcriptome in the Mouse Embryo
Source: PubMed Central journal article supplement (PMC3022534; doi:10.1371/journal.pbio.1000582), 2011-01-18
Supplement: pbio.1000582.s017.pdf [file pbio.1000582.s017.pdf]

**Table S9.** Classification of single cell expression patterns in the E14.5 liver

| Pattern                                                                                                                                 | Gene                 | Function                                                  | Localization              | Accession # |
|-----------------------------------------------------------------------------------------------------------------------------------------|----------------------|-----------------------------------------------------------|---------------------------|-------------|
| <p>Group1: single scattered cells, d &gt;&gt; cd</p>  | Agpat3               | lipid metabolism                                          | integral membrane protein | NM_053014   |
|                                                                                                                                         | Alas1                | heme biosynthesis                                         | mitochondrial protein     | NM_020559   |
|                                                                                                                                         | Aldoa                | glycolysis                                                | mitochondrial protein     | NM_007438   |
|                                                                                                                                         | Angpt1               | cytokine                                                  | secreted                  | NM_009640   |
|                                                                                                                                         | Arhgap24             | GTPase activator                                          | cytoplasmic               | NM_029270   |
|                                                                                                                                         | Cd200r1              | receptor                                                  | integral membrane protein | NM_021325   |
|                                                                                                                                         | Cd48                 | T cell activation                                         | plasma membrane           | NM_007649   |
|                                                                                                                                         | Ctgf                 | cytokine                                                  | secreted                  | NM_010217   |
|                                                                                                                                         | Daf2                 | immune response                                           | integral membrane protein | NM_007827   |
|                                                                                                                                         | Dapp1                | phosphoinositide 3-kinase regulator activity              | membrane and cytoplasm    | NM_011932   |
|                                                                                                                                         | Dusp10               | MAP kinase tyrosine/serine/threonine phosphatase activity | cytoplasm                 | NM_022019   |
|                                                                                                                                         | F5                   | blood coagulation                                         | secreted                  | NM_007976   |
|                                                                                                                                         | <b>Gata2</b>         | transcription factor                                      | nuclear                   | NM_008090   |
|                                                                                                                                         | Gucy1a3              | guanylate cyclase activity                                | cytoplasm                 | NM_021896   |
|                                                                                                                                         | Ifitm7               | unknown function                                          | integral membrane protein | NM_028968   |
|                                                                                                                                         | <b>Itga2b</b> (CD41) | cell adhesion                                             | integral membrane protein | NM_010575   |
|                                                                                                                                         | Jag1                 | Notch binding                                             | integral membrane protein | NM_013822   |
|                                                                                                                                         | Kcnj5                | ion channel                                               | integral membrane protein | NM_010605   |
| Kcnk6                                                                                                                                   | ion channel          | integral membrane protein                                 | NM_001033525              |             |

|                                                                                     |              |                                       |                           |           |
|-------------------------------------------------------------------------------------|--------------|---------------------------------------|---------------------------|-----------|
|    | Kctd11       | ion channel                           | integral membrane protein | NM_153143 |
|    | Laf4l        | transcription regulation              | nuclear                   | NM_033565 |
|    | Lcn2         | associated with neutrophil gelatinase | extracellular             | NM_008491 |
|    | Lef1         | transcription factor                  | nuclear                   | NM_010703 |
|    | Lta4h        | arachidonic acid metabolism           | cytoplasm                 | NM_008517 |
|    | Ltbp1        | Tgfb1 binding                         | extracellular             | NM_206958 |
|    | Mmn1         | candidate receptor for factor 5       | secreted                  | XM_284198 |
|    | Myom1        | cytoskeleton component                | cytoplasm                 | NM_010867 |
|    | Ngp          | immune response                       | secreted                  | NM_008694 |
|    | Phlda1       | T-cell death associated               | unknown                   | NM_009344 |
|    | Pttg1        | peptidase inhibitor activity          | cytoplasm and nucleus     | NM_013917 |
|  | <b>Runx1</b> | transcription factor                  | nuclear                   | NM_009821 |
|  | Serpine2     | peptidase inhibitor activity          | secreted                  | NM_009255 |
|  | Slamf1       | receptor                              | integral membrane protein | NM_013730 |
|  | Slpi         | peptidase inhibitor activity          | secreted                  | NM_011414 |
|  | Tgfb11       | Wnt receptor signaling pathway        | focal adhesion sites      | NM_009365 |
|  | Tgfb14       | tumor suppressor                      | nuclear                   | NM_009366 |
|  | Za20d2       | protein degradation                   | cytoplasm                 | NM_009551 |
|  | Zfx1b        | transcription factor                  | nuclear                   | AK032970  |

Group2: single scattered cells, d >> cd and circles of cells

|                                                                                     |               |                  |                       |           |
|-------------------------------------------------------------------------------------|---------------|------------------|-----------------------|-----------|
|  | 2810457I06Rik | unknown function | cytoplasm and nucleus | NM_176860 |
|  | 3110003A17Rik | unknown function | unknown               | XM_125510 |

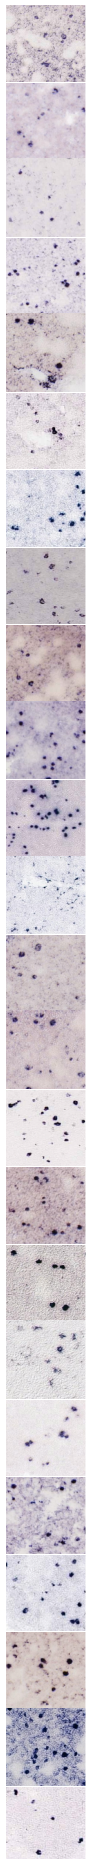

|             |                                              |                                               |           |
|-------------|----------------------------------------------|-----------------------------------------------|-----------|
| Actc1       | cytoskeleton                                 | cytoplasm                                     | NM_009608 |
| Adcy9       | adenylate cyclase activity                   | integral membrane protein                     | NM_009624 |
| Ai838661    | GTP binding                                  | cellular                                      | NM_133884 |
| Clec1b      | transmembrane receptor activity              | integral membrane protein                     | NM_019985 |
| Clu         | cell death: secreted                         | unknown                                       | NM_013492 |
| Csrp1       | unknown function                             | unknown                                       | BC006912  |
| F8a         | unknown function                             | unknown                                       | NM_007978 |
| Ifi47       | immune response                              | unknown                                       | NM_008330 |
| Kif5b       | motor activity                               | cytoplasm                                     | U86090    |
| Lims1       | cell-cell adhesion                           | focal adhesion sites                          | NM_026148 |
| Ltf         | iron ion binding                             | cytoplasm and extracellular                   | NM_008522 |
| <b>Ly6a</b> |                                              | glycosylphosphatidylinositol-anchored protein | NM_010738 |
| Mapk6       | MAP kinase activity                          | cytoplasm                                     | NM_015806 |
| Mef2c       | transcription factor                         | nuclear                                       | NM_025282 |
| P2rx1       | ion channel                                  | integral membrane protein                     | NM_008771 |
| Parvb       | cell adhesion                                | plasma membrane                               | AF237770  |
| Pde5a       | cyclic-nucleotide phosphodiesterase activity | cytoplasm                                     | NM_153422 |
| Plcg2       | T cell receptor signaling pathway            | unknown                                       | NM_172285 |
| Prkca       | protein kinase activity                      | cytoplasm                                     | NM_011101 |
| Pttg1ip     | Pttg1 binding                                | integral membrane protein                     | BC025533  |
| Serpib10    | peptidase inhibitor activity                 | cytoplasm                                     | NM_198028 |
| Sla         | T cell receptor regulation                   | cytoplasm                                     | AJ131777  |
| Slc14a1     | solute transport                             | integral membrane protein                     | NM_028122 |
| Slc6a4      | solute transport                             | integral membrane protein                     | NM_010484 |

|                                                                                   |        |                              |                           |           |
|-----------------------------------------------------------------------------------|--------|------------------------------|---------------------------|-----------|
|  | Tgfb1  | cytokine                     | secreted                  | NM_011577 |
|  | Timp3  | peptidase inhibitor activity | secreted                  | NM_011595 |
|  | Tm7sf3 | unknown function             | integral membrane protein | XM_132970 |
|  | Tmem40 | unknown function             | integral membrane protein | NM_144805 |
|  | Tnnc1  | cytoskeleton                 | cytoplasm                 | NM_009393 |
|  | Trpc6  | channel                      | integral membrane protein | NM_013838 |
|  | Unc119 | unknown function             | unknown                   | NM_011676 |
|  | Vwf    | blood coagulation            | secreted                  | NM_011708 |

Group3: single scattered cells, d ≥ cd

|                                                                                     |         |                                    |                           |           |
|-------------------------------------------------------------------------------------|---------|------------------------------------|---------------------------|-----------|
|   | Alox5ap | arachidonic acid metabolism        | integral membrane protein | NM_009663 |
|  | Car1    | one-carbon metabolism              | cytoplasm                 | NM_009799 |
|  | Cd34    | cell adhesion                      | integral membrane protein | NM_133654 |
|  | Cd5l    | apoptosis                          | unknown                   | NM_009690 |
|  | Cd68    | transmembrane glycoprotein         | unknown                   | NM_009853 |
|  | Cited2  | transcription coactivator activity | nuclear                   | NM_010828 |
|  | Clca2   | channel                            | integral membrane protein | NM_030601 |
|  | Csf1r   | cytokine receptor                  | integral membrane protein | NM_007779 |
|  | Dcn     | extracellular matrix binding       | secreted                  | NM_007833 |
|  | Egr1    | transcription factor               | nuclear                   | NM_007913 |
|  | H2afy   | chromatin binding                  | nuclear                   | XM_127380 |
|  | Itgb2   | cell adhesion                      | integral membrane protein | NM_008404 |
|  | Lhx2    | transcription factor               | nuclear                   | NM_010710 |
|  | Lrmp    | unknown function                   | integral membrane protein | NM_008511 |

|                                                                                   |           |                                     |                                        |           |
|-----------------------------------------------------------------------------------|-----------|-------------------------------------|----------------------------------------|-----------|
|  | Ncf1      | subunit of neutrophil NADPH oxidase | cytoplasm                              | NM_010876 |
|  | Parp8     | ADP-ribose polymerization           | cytoplasm                              | NM_027272 |
|  | Psap      | saposin precursor                   | secreted and integral membrane protein | NM_011179 |
|  | Serpinb1b | peptidase inhibitor activity        | cytoplasm                              | NM_173052 |
|  | Sfpi1     | transcription factor                | nuclear                                | NM_011355 |
|  | Syne1     | actin binding                       | nuclear envelope                       | XM_358299 |

Group4: clustered cells,  $d \approx cd$

|                                                                                     |                         |                                       |                            |           |
|-------------------------------------------------------------------------------------|-------------------------|---------------------------------------|----------------------------|-----------|
|    | Emb                     | cell adhesion                         | integral membrane protein  | NM_010330 |
|    | Emr1                    | fatty acid biosynthetic process       | integral to membrane of ER | NM_010130 |
|   | Hmox1                   | heme oxygenase activity               | ER                         | NM_010442 |
|  | <b>Kit</b><br>(CD117)   | protein tyrosine kinase activity      | integral membrane protein  | NM_021099 |
|  | Mpo                     | heme binding                          | mitochondrial              | NM_010824 |
|  | Myb                     | transcription factor                  | nuclear                    | NM_010848 |
|  | Plac8                   | immune response                       | unknown                    | NM_139198 |
|  | <b>Ptpnc</b><br>(CD45R) | protein tyrosine phosphatase activity | integral membrane protein  | NM_011210 |
|  | Slc17a3                 | transporter                           | integral membrane protein  | NM_134069 |
|  | Spic                    | transcription factor                  | nuclear                    | NM_011461 |
|  | Stab2                   | cell adhesion                         | integral membrane protein  | NM_138673 |

Abbreviations: d, distance between cells; cd, cell diameter; ER, endoplasmic reticulum.
